# Supplementary material for: Disruption of Crystal Packing in Thieno[2,3-b]pyridines Improves Anti-Proliferative Activity
Source: MDPI journal article supplement (doi:10.3390/molecules27030836), 2022-01-27
Supplement: s1 [file s1]

# Supplementary Materials for:

## Disruption of Crystal Packing in Thieno[2,3-*b*]pyridines Improves Anti-proliferative Activity

Natalie A. Haverkate,<sup>1</sup> Euphemia Leung<sup>2</sup>, Lisa I. Pilkington<sup>1</sup>, David Barker<sup>1,3\*</sup>

<sup>1</sup>School of Chemical Sciences, University of Auckland, Auckland 1010, New Zealand

<sup>2</sup>Auckland Cancer Society Research Centre and Department of Molecular Medicine and Pathology, University of Auckland, Grafton, Auckland 1023, New Zealand

<sup>3</sup>The MacDiarmid Institute for Advanced Materials and Nanotechnology, Victoria University of Wellington, Wellington 6012, New Zealand

Corresponding author. d.barker@auckland.ac.nz; Tel.: +64-9-373-7599

### Table of Contents:

|                                                              |         |
|--------------------------------------------------------------|---------|
| General synthetic procedures                                 | S2      |
| Synthetic procedures and compound characterisation data      | S3-S19  |
| <sup>1</sup> H and <sup>13</sup> C NMR spectra for compounds | S20-S49 |
| HRMS data for compounds                                      | S50-S57 |
| Computational logP and logS values                           | S58     |
| Melting points                                               | S59     |
| Anti-proliferative data for compounds                        | S60     |
| References                                                   | S61     |

### *General Procedure A: Synthesis of thieno[2,3-*b*]pyridine-2-carboxamide derivatives 4a-e*

A mixture of carbonitrile **2** (1 equiv.), acetamides **3a-e** (1 equiv.), and anhydrous sodium carbonate (1.06-2 equiv.) in absolute ethanol (4.00 mL per mmol acetamide) was stirred at reflux for 24-48 h. The ethanol was then removed *in vacuo* and the remaining residue

recrystallised from methanol to give the thieno[2,3-*b*]pyridine-2-carboxamide derivatives **4a-e**.

*General procedure B: Synthesis of thieno[2,3-*b*]pyridine-2-carboxamide alcohols 5a-e*

To a solution of ketones **4a-e** (1 equiv.) in dry THF was added a solution of sodium borohydride (1 equiv.) in methanol, dropwise, over 15 min. The mixture was stirred at r.t. for 2 h, water added and stirred for a further 5 min before the volatiles were removed *in vacuo*. The residue was diluted with water, extracted with ethyl acetate, washed with H<sub>2</sub>O and dried with MgSO<sub>4</sub> to give the thieno[2,3-*b*]pyridine-2-carboxamide alcohols **5a-e**.

*General Procedure C: Synthesis of esters and carbonates 6a-e, 7a-e and 8a-e*

To a stirred solution of alcohol (1 equiv.) and DMAP (2.5 equiv.) in dry pyridine under an atmosphere of N<sub>2</sub> at r.t. was added Boc or acetic anhydride, or methyl chloroformate (2.0 equiv.) dropwise. The mixture was monitored by TLC over 20 min, after which the mixture was quenched with equivalent portions of sat. aq. NaHCO<sub>3</sub> followed by 1 M HCl. The mixture was extracted with ethyl acetate, washed with water, dried with MgSO<sub>4</sub>, and the solvent removed *in vacuo* to give the crude product, which was purified using flash chromatography to give the desired product.

**5-Acetyl-6-methyl-2-thioxo-1,2-dihydropyridine-3-carbonitrile 2**

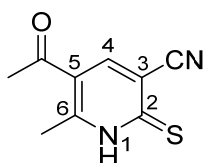

A mixture of acetylacetone **1** (1.00 mL, 10.0 mmol) and *N,N*-dimethylformamide dimethyl acetal (1.33 mL, 10.0 mmol) in dry dioxane (10.0 mL) was stirred under an atmosphere of nitrogen at r.t. overnight. A second mixture of sodium methoxide was prepared by adding sodium (0.46 g, 20.0 mmol) to dry methanol (10.5 mL, 0.260 mol). Cyanothioacetamide (1.00 g, 10.0 mmol) was added to the sodium methoxide and stirred for 10 min, after which the thioacetamide mixture was added to the acetone mixture and stirred for 1 h at r.t.. This was followed by heating at reflux for 4 h. After cooling, the mixture was acidified with ice cold 2 M HCl and water (10 mL) added. The resulting solid was collected by filtration to give the *title compound 2* (1.86 g, 97%) as a light brown solid. m.p. 200-202 °C (Lit. 230-232 °C).<sup>1</sup> δ<sub>H</sub> (400

MHz, (CD<sub>3</sub>)<sub>2</sub>SO) 2.51 (3H, s, COCH<sub>3</sub>), 2.64 (3H, s, 6-CH<sub>3</sub>), 8.55 (1H, s, H-4), 14.26 (1H, br s, NH). The <sup>1</sup>H NMR values were in agreement with literature values.<sup>26</sup>

#### 5-Acetyl-3-amino-6-methyl-*N*-phenylthieno[2,3-*b*]pyridine-2-carboxamide **4a**

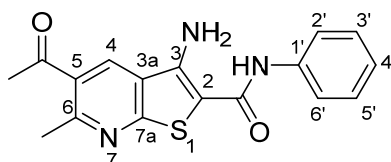

The reaction was carried out following general procedure A using carbonitrile **2** (100 mg, 0.52 mmol), acetamide **3a** (110 mg, 0.52 mmol) and anhydrous sodium carbonate (60.0 mg, 0.55 mmol) in absolute ethanol (4.00 mL) to give the *title compound* **4a** (116 mg, 69%) as a light brown solid. m.p. 228-230 °C (Lit. 228-230 °C).<sup>2</sup> δ<sub>H</sub> (400 MHz, (CD<sub>3</sub>)<sub>2</sub>SO) 2.66 (3H, s, 5-COCH<sub>3</sub>), 2.75 (3H, s, 6-CH<sub>3</sub>), 7.07 (1H, t, *J* = 7.8 Hz, H-4'), 7.32 (2H, t, *J* = 7.8 Hz, H-3' and H-5'), 7.50 (2H, br s, NH<sub>2</sub>), 7.68 (2H, d, *J* = 7.8 Hz, H-2' and H-6'), 9.05 (1H, s, H-4), 9.40 (1H, br s, NH). The <sup>1</sup>H NMR values were in agreement with literature values.<sup>1</sup>

#### 5-Acetyl-3-amino-6-methyl-*N*-(*o*-tolyl)thieno[2,3-*b*]pyridine-2-carboxamide **4b**

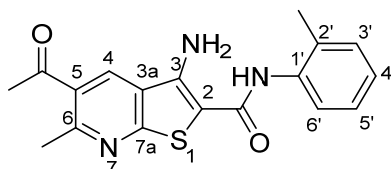

The reaction was carried out following general procedure A using carbonitrile **2** (100 mg, 0.52 mmol), acetamide **3b** (100 mg, 0.52 mmol) and anhydrous sodium carbonate (60.0 mg, 0.55 mmol) in absolute ethanol (4.00 mL) to give the *title compound* **4b** (112 mg, 63%) as a yellow solid. m.p. > 230 °C (Lit. > 230 °C).<sup>2</sup> δ<sub>H</sub> (400 MHz, (CD<sub>3</sub>)<sub>2</sub>SO) 2.23 (3H, s, 2'-CH<sub>3</sub>), 2.66 (3H, s, 5-COCH<sub>3</sub>), 2.75 (3H, s, 6-CH<sub>3</sub>), 7.13 (1H, t, *J* = 7.3 Hz, H-4'), 7.19 (1H, t, *J* = 7.3 Hz, H-5'), 7.26 (1H, d, *J* = 7.3 Hz, H-3'), 7.33 (1H, d, *J* = 7.3 Hz, H-6'), 7.35 (2H, br s, NH<sub>2</sub>), 9.02 (1H, s, H-4), 9.18 (1H, br s, NH). The <sup>1</sup>H NMR values were in agreement with literature values.<sup>1</sup>

#### 5-Acetyl-3-amino-*N*-(3'-chloro-2'-methylphenyl)-6-methylthieno[2,3-*b*]pyridine-2-carboxamide **4c**

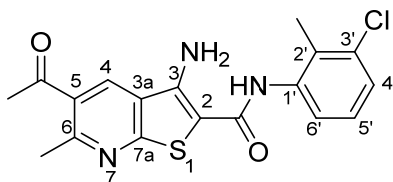

The reaction was carried out following general procedure A using carbonitrile **2** (100 mg, 0.52 mmol), acetamide **3c** (110 mg, 0.52 mmol) and anhydrous sodium carbonate (110 mg, 1.04 mmol) in absolute ethanol (4.00 mL) to give the *title compound* **4c** (207 mg, quant.) as a yellow/cream solid. m.p. > 230 °C (Lit. > 230 °C).<sup>2</sup>  $\delta_{\text{H}}$  (400 MHz, (CD<sub>3</sub>)<sub>2</sub>SO) 2.24 (3H, s, 2'-CH<sub>3</sub>), 2.66 (3H, s, 5-COCH<sub>3</sub>), 2.75 (3H, s, 6-CH<sub>3</sub>), 7.21 (1H, t,  $J$  = 8.0 Hz, H-5'), 7.31 (2H, d,  $J$  = 8.0 Hz, H-4' and H-6'), 7.40 (2H, br s, NH<sub>2</sub>), 9.03 (1H, s, H-4), 9.41 (1H, br s, NH). The <sup>1</sup>H NMR values were in agreement with literature values.<sup>1</sup>

**5-Acetyl-3-amino-6-methyl-N-(naphthalen-1'-yl)thieno[2,3-b]pyridine-2-carboxamide**  
**4d**

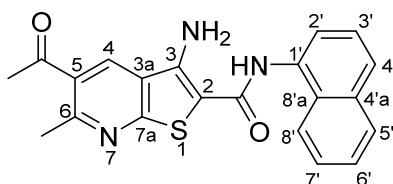

The reaction was carried out following general procedure A using carbonitrile **2** (100 mg, 0.52 mmol), acetamide **3d** (110 mg, 0.52 mmol) and anhydrous sodium carbonate (110 mg, 1.04 mmol) in absolute ethanol (4.00 mL) to give the *title compound* **4d** (93.0 mg, 47%) as a light yellow solid. m.p. >230 °C (Lit. > 230 °C).<sup>2</sup>  $\delta_{\text{H}}$  (400 MHz, (CD<sub>3</sub>)<sub>2</sub>SO) 2.67 (3H, s, 5-COCH<sub>3</sub>), 2.76 (3H, s, 6-CH<sub>3</sub>), 7.40 (2H, br s, NH<sub>2</sub>), 7.46-7.51 (3H, m, 3 × Ar-CH), 7.66-7.71 (2H, m, 2 × Ar-CH), 7.90-7.91 (1H, m, Ar-CH), 8.07 (1H, br, s, Ar-CH), 8.99 (1H, s, H-4), 9.66 (1H, br s, NH). The <sup>1</sup>H NMR values were in agreement with literature values.<sup>1</sup>

### 5-Acetyl-3-amino-*N*-(4'-methoxyphenyl)-6-methylthieno[2,3-*b*]pyridine-2-carboxamide

**4e**

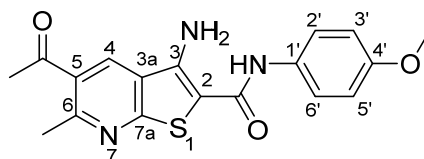

The reaction was carried out following general procedure A using carbonitrile **2** (100 mg, 0.52 mmol), acetamide **3e** (100 mg, 0.52 mmol) and anhydrous sodium carbonate (110 mg, 1.04 mmol) in absolute ethanol (4.00 mL) to give the *title compound* **4e** (159 mg, 88%) as a yellow solid. m.p. 218-220 °C (Lit. 219-221°C).<sup>2</sup>  $\delta_{\text{H}}$  (400 MHz, (CD<sub>3</sub>)<sub>2</sub>SO) 2.66 (3H, s, 5-COCH<sub>3</sub>), 2.75 (3H, s, 6-CH<sub>3</sub>), 3.74 (3H, s, 4'-OCH<sub>3</sub>), 6.89 (2H, d,  $J$  = 9.0 Hz, H-3' and H-5'), 7.44 (2H, br s, NH<sub>2</sub>), 7.57 (2H, d,  $J$  = 9.0 Hz, H-2' and H-6'), 9.03 (1H, s, H-4), 9.36 (1H, br s, NH). The <sup>1</sup>H NMR values were in agreement with literature values.<sup>1</sup>

### 3-Amino-5-(1-hydroxyethyl)-6-methyl-*N*-phenylthieno[2,3-*b*]pyridine-2-carboxamide **5a**

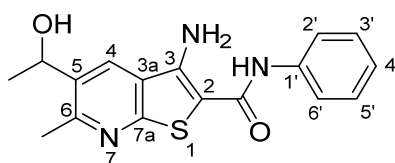

The reaction was carried out following general procedure B using ketone **4a** (0.05 g, 0.15 mmol), NaBH<sub>4</sub> (6.00 mg, 0.15 mmol) and methanol (0.51 mL) in THF (7.70 mL) to give the *title compound* **5a** (32.0 mg, 64%) as a yellow solid. m.p. >230 °C (Lit. > 230 °C).<sup>2</sup>  $\delta_{\text{H}}$  (400 MHz, (CD<sub>3</sub>)<sub>2</sub>SO) 1.40 (3H, d,  $J$  = 6.4 Hz, CHCH<sub>3</sub>), 2.61 (3H, s, 6-CH<sub>3</sub>), 5.02 (1H, dq,  $J$  = 6.4, 3.6 Hz, CHOH), 5.34 (1H, d,  $J$  = 3.6 Hz, CHOH), 7.06 (1H, t,  $J$  = 7.6 Hz, H-4'), 7.31 (2H, d,  $J$  = 7.6 Hz, H-3' and H-5'), 7.41 (2H, br s, NH<sub>2</sub>), 7.68 (2H, d,  $J$  = 7.6 Hz, H-2' and H-6'), 8.54 (1H, s, H-4), 9.34 (1H, br s, NH). The <sup>1</sup>H NMR values were in agreement with literature values.<sup>1</sup>

### 3-Amino-5-(1-hydroxyethyl)-6-methyl-*N*-(*o*-tolyl)thieno[2,3-*b*]pyridine-2-carboxamide

#### 5b

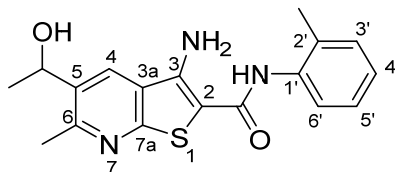

The reaction was carried out following general procedure B using ketone **4b** (0.05 g, 0.15 mmol), NaBH<sub>4</sub> (5.60 mg, 0.15 mmol) and methanol (0.50 mL) in THF (7.40 mL) to give the *title compound* **5b** (25.0 mg, 50%) as a yellow solid. m.p. 143-145 °C (Lit. 142-144 °C).<sup>2</sup>  $\delta_{\text{H}}$  (400 MHz, (CD<sub>3</sub>)<sub>2</sub>SO) 1.40 (3H, d,  $J$  = 6.3 Hz, CHCH<sub>3</sub>), 2.22 (3H, s, 2'-CH<sub>3</sub>), 2.61 (3H, s, 6-CH<sub>3</sub>), 5.02 (1H, dq,  $J$  = 6.3, 3.8 Hz, CHOH), 5.35 (1H, d,  $J$  = 3.8 Hz, CHOH), 7.16 (1H, dd,  $J$  = 7.4, 1.8 Hz, H-4'), 7.19 (1H, dd,  $J$  = 7.4, 1.8 Hz, H-5'), 7.26-7.32 (4H, m, H-3', H-6' and NH<sub>2</sub>), 8.52 (1H, s, H-4), 9.03 (1H, br s, NH). The <sup>1</sup>H NMR values were in agreement with literature values.<sup>1</sup>

### 3-Amino-*N*-(3'-chloro-2'-methylphenyl)-5-(1-hydroxyethyl)-6-methylthieno[2,3-*b*]pyridine-2-carboxamide **5c**

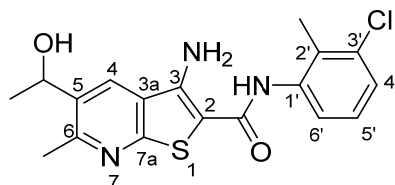

The reaction was carried out following general procedure B using ketone **4c** (0.08 g, 0.21 mmol), NaBH<sub>4</sub> (8.10 mg, 0.21 mmol) and methanol (0.71 mL) in THF (10.7 mL) to give the *title compound* **5c** (49.0 mg, 61%) as a yellow solid. m.p. >230 °C (Lit. > 230 °C).<sup>2</sup>  $\delta_{\text{H}}$  (400 MHz, (CD<sub>3</sub>)<sub>2</sub>SO) 1.40 (3H, d,  $J$  = 6.4 Hz, CHCH<sub>3</sub>), 2.23 (3H, s, 2'-CH<sub>3</sub>), 2.61 (3H, s, 6-CH<sub>3</sub>), 5.02 (1H, dq,  $J$  = 6.4, 3.6 Hz, CHOH), 5.35 (1H, d,  $J$  = 3.6 Hz, CHOH), 7.22 (1H, t,  $J$  = 7.8 Hz, H-5'), 7.26 (1H, d,  $J$  = 7.8 Hz, H-6'), 7.28-7.35 (3H, m, H-4' and NH<sub>2</sub>), 8.53 (1H, s, H-4), 9.30 (1H, br s, NH). The <sup>1</sup>H NMR values were in agreement with literature values.<sup>1</sup>

**3-Amino-5-(1-hydroxyethyl)-6-methyl-N-(naphthalen-1-yl)thieno[2,3-*b*]pyridine-2-carboxamide **5d****

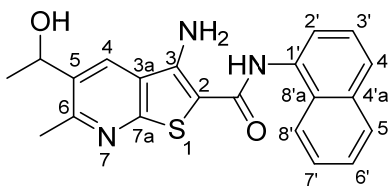

The reaction was carried out following general procedure B using ketone **4d** (0.04 g, 0.107 mmol), NaBH<sub>4</sub> (4.00 mg, 0.107 mmol) and methanol (0.35 mL) in THF (5.30 mL) to give the *title compound* **5d** (44.0 mg, quant.) as a yellow solid. m.p. 216-218 °C (Lit. 216-218 °C).<sup>2</sup>  $\delta_{\text{H}}$  (400 MHz, (CD<sub>3</sub>)<sub>2</sub>SO) 1.40 (3H, d,  $J$  = 6.4 Hz, CHCH<sub>3</sub>), 2.63 (3H, s, 6-CH<sub>3</sub>), 5.04 (1H, dq,  $J$  = 6.4, 3.7 Hz, CHOH), 5.37 (1H, d,  $J$  = 3.7 Hz, CHOH), 7.33 (2H, br s, NH<sub>2</sub>), 7.52-7.56 (4H, m, 4 × Ar-CH), 7.84-7.86 (1H, m, Ar-CH), 7.91-7.98 (2H, m, 2 × Ar-CH), 8.54 (1H, s, H-4), 9.62 (1H, br s, NH). The <sup>1</sup>H NMR values were in agreement with literature values.<sup>1</sup>

**3-Amino-5-(1-hydroxyethyl)-N-(4'-methoxyphenyl)-6-methylthieno[2,3-*b*]pyridine-2-carboxamide **5e****

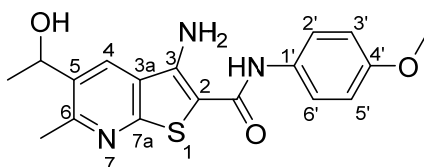

The reaction was carried out following general procedure B using ketone **4e** (0.08 g, 0.23 mmol), NaBH<sub>4</sub> (8.50 mg, 0.23 mmol) and methanol (0.74 mL) in THF (11.3 mL) to give the *title compound* **5e** (90.0 mg, quant.) as a yellow solid. m.p. >230 °C (Lit. > 230 °C).<sup>2</sup>  $\delta_{\text{H}}$  (400 MHz, (CD<sub>3</sub>)<sub>2</sub>SO) 1.40 (3H, d,  $J$  = 6.3 Hz, CHCH<sub>3</sub>), 2.61 (3H, s, 6-CH<sub>3</sub>), 3.74 (3H, s, 4'-OCH<sub>3</sub>), 5.02 (1H, dq,  $J$  = 6.3, 3.4 Hz, CHOH), 5.34 (1H, d,  $J$  = 3.4 Hz, CHOH), 6.89 (2H, d,  $J$  = 8.8 Hz, H-3' and H-5'), 7.35 (2H, br s, NH<sub>2</sub>), 7.56 (2H, d,  $J$  = 8.8 Hz, H-2' and H-6'), 8.52 (1H, s, H-4), 9.24 (1H, br s, NH). The <sup>1</sup>H NMR values were in agreement with literature values.<sup>1</sup>

### 1-(3-Amino-6-methyl-2-(phenylcarbamoyl)thieno[2,3-*b*]pyridin-5-yl)ethyl acetate **6a**

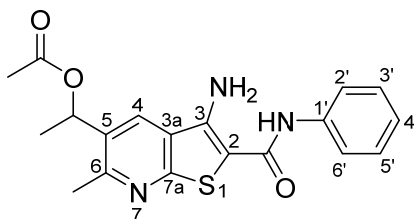

The reaction was carried out following General Procedure C using alcohol **5a** (14.0 mg, 0.04 mmol), DMAP (13.0 mg, 0.11 mmol) and acetic anhydride (0.08 mL, 0.09 mmol) in dry pyridine (0.50 mL) for 15 min then purified with flash chromatography (3:1 petroleum ether, ethyl acetate) to give the *title compound* **6a** (10.0 mg, 63%) as a pale yellow crystalline solid. m.p. 203-205 °C.  $\delta_{\text{H}}$  (400 MHz,  $(\text{CD}_3)_2\text{SO}$ ) 1.55 (3H, d,  $J = 6.5$  Hz, 5-CHCH $\underline{\text{H}}$ <sub>3</sub>), 2.08 (3H, s, acetyl COCH<sub>3</sub>), 2.64 (3H, s, 6-CH<sub>3</sub>), 6.01 (1H, q,  $J = 6.5$  Hz, 5-CHCH $\underline{\text{H}}$ <sub>3</sub>), 7.07 (1H, tt,  $J = 7.5$ , 1.1 Hz, H-4'), 7.32 (2H, t,  $J = 7.5$  Hz, H-3' and H-5'), 7.41 (2H, br s, NH<sub>2</sub>), 7.69 (2H, dd,  $J = 7.5$ , 1.1 Hz, H-2' and H-6'), 8.52 (1H, s, H-4), 9.39 (1H, br s, NH).  $\delta_{\text{C}}$  (100 MHz,  $(\text{CD}_3)_2\text{SO}$ ) 20.8 and 20.9 (5-CHCH $\underline{\text{H}}$ <sub>3</sub> and acetyl COCH<sub>3</sub>), 22.4 (6-CH<sub>3</sub>), 68.4 (5-CHCH $\underline{\text{H}}$ <sub>3</sub>), 96.0 (C-2), 121.1 (C-2' and C-6'), 123.3 (C-4'), 124.5 (C-3a), 128.1 (C-4), 128.4 (C-3' and C-5'), 132.0 (C-5), 138.0 (C-1'), 147.0 (C-3), 156.8 (C-6), 157.2 (C-7a), 163.9 (2-CONH), 169.8 (acetyl COCH<sub>3</sub>).  $\nu_{\text{max}}$  (ATR)/cm<sup>-1</sup> 3437 (N-H amide), 3329 (N-H amine), 2929 (C-H aromatic), 2825 (C-H alkane), 1735 (C=O carbonyl), 1608 (C=O amide), 1529 (C=C aromatic), 1438 (-C-H bending), 1223 (C-N aromatic), 1102 (C-O ether), 1075 (C-N aliphatic).  $m/z$  (ESI<sup>+</sup>): 370 (MH<sup>+</sup>, 100%). HRMS (ESI<sup>+</sup>) found (MH<sup>+</sup>): 370.1214 C<sub>19</sub>H<sub>20</sub>N<sub>3</sub>O<sub>3</sub>S requires 370.1220.

### 1-(3-Amino-6-methyl-2-(*o*-tolylcarbamoyl)thieno[2,3-*b*]pyridin-5-yl)ethyl acetate **6b**

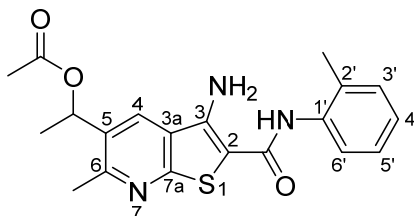

The reaction was carried out following General Procedure C using alcohol **5b** (26 mg, 0.08 mmol), DMAP (23.0 mg, 0.19 mmol) and acetic anhydride (0.01 mL, 0.15 mmol) in dry pyridine (0.60 mL) for 15 min then purified with flash chromatography (3:1 petroleum ether, ethyl acetate) to give the *title compound* **6b** (15.0 mg, 54%) as a pale yellow crystalline solid.



m.p. 196-198 °C.  $\delta_{\text{H}}$  (400 MHz,  $(\text{CD}_3)_2\text{SO}$ ) 1.56 (3H, d,  $J = 6.5$  Hz, 5-CHCH $\underline{\text{H}}$ 3), 2.08 (3H, s, acetyl COCH $\underline{\text{H}}$ 3), 2.22 (3H, s, 2'-CH $\underline{\text{H}}$ 3), 2.64 (3H, s, 6-CH $\underline{\text{H}}$ 3), 6.01 (1H, q,  $J = 6.5$  Hz, 5-CHCH $\underline{\text{H}}$ 3), 7.15 (1H, td,  $J = 7.3, 1.3$  Hz, H-4'), 7.20 (1H, td,  $J = 7.3, 1.3$  Hz, H-5'), 7.25 (1H, dd,  $J = 7.3, 1.3$  Hz, H-3'), 7.29 (2H, br s, NH $\underline{\text{H}}$ 2), 7.32 (1H, dd,  $J = 7.3, 1.3$  Hz, H-6'), 8.50 (1H, s, H-4), 9.08 (1H, br s, NH).  $\delta_{\text{C}}$  (100 MHz,  $(\text{CD}_3)_2\text{SO}$ ) 17.9 (2'-CH $\underline{\text{H}}$ 3), 20.8 and 20.9 (5-CHCH $\underline{\text{H}}$ 3 and acetyl COCH $\underline{\text{H}}$ 3), 22.2 (6-CH $\underline{\text{H}}$ 3), 68.4 (5-CHCH $\underline{\text{H}}$ 3), 96.5 (C-2), 124.6 (C-3a), 125.8 and 125.9 (C-4' and C-5'), 126.8 (C-6'), 128.0 (C-4), 130.1 (C-3'), 131.9 (C-5), 133.9 (C-2'), 136.4 (C-1'), 146.3 (C-3), 156.6 (C-6), 157.1 (C-7a), 163.9 (2-CONH), 169.8 (acetyl COCH $\underline{\text{H}}$ 3).  $\nu_{\text{max}}$  (ATR)/cm $^{-1}$  3406 (N-H amide), 3294 (N-H amine), 2970 (C-H aromatic), 2930 (C-H alkane), 1738 (C=O carbonyl), 1610 (C=O amide), 1514 (C=C aromatic), 1489 (-C-H bending), 1232 (C-N aromatic), 1114 (C-O ether), 1072 (C-N aliphatic).  $m/z$  (ESI $^{+}$ ): 384 (MH $^{+}$ , 100%), 346 (97%), 324 (55%). HRMS (ESI $^{+}$ ) found (MH $^{+}$ ): 384.1370 C $_{20}$ H $_{22}$ N $_3$ O $_3$ S requires 384.1376.

**1-(3-Amino-2-((3'-chloro-2'-methylphenyl)carbamoyl)-6-methylthieno[2,3-*b*]pyridin-5-yl)ethyl acetate 6c**

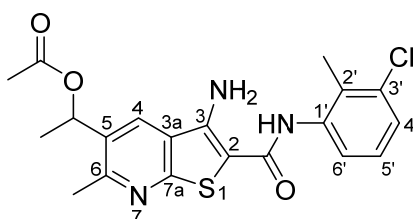

The reaction was carried out following General Procedure C using alcohol **5c** (0.10 g, 0.27 mmol), DMAP (81.0 mg, 0.67 mmol) and acetic anhydride (0.05 mL, 0.53 mmol) in dry pyridine (2 mL) for 15 min then purified with flash chromatography (3:1 petroleum ether, ethyl acetate) to give the *title compound* **6c** (62.0 mg, 56%) as a pale yellow crystalline solid. m.p. 209-211 °C.  $\delta_{\text{H}}$  (400 MHz,  $(\text{CD}_3)_2\text{SO}$ ) 1.55 (3H, d,  $J = 6.4$  Hz, 5-CHCH $\underline{\text{H}}$ 3), 2.08 (3H, s, acetyl COCH $\underline{\text{H}}$ 3), 2.23 (3H, s, 2'-CH $\underline{\text{H}}$ 3), 2.64 (3H, s, 6-CH $\underline{\text{H}}$ 3), 6.01 (1H, q,  $J = 6.4$  Hz, 5-CHCH $\underline{\text{H}}$ 3), 7.22 (1H, t,  $J = 7.5$  Hz, H-5'), 7.28 (1H, dd,  $J = 7.5, 1.4$  Hz, H-6'), 7.34 (1H, dd,  $J = 7.5, 1.4$  Hz, H-4'), 7.33 (2H, br s, NH $\underline{\text{H}}$ 2), 8.51 (1H, s, H-4), 9.36 (1H, br s, NH).  $\delta_{\text{C}}$  (100 MHz,  $(\text{CD}_3)_2\text{SO}$ ) 15.4 (2'-CH $\underline{\text{H}}$ 3), 20.8 and 20.9 (5-CHCH $\underline{\text{H}}$ 3 and acetyl COCH $\underline{\text{H}}$ 3), 22.3 (6-CH $\underline{\text{H}}$ 3), 68.4 (5-CHCH $\underline{\text{H}}$ 3), 95.8 (C-2), 124.5 (C-3a), 126.2 (C-6'), 126.5 (C-4'), 126.7 (C-5'), 128.1 (C-4), 132.0 (C-5), 132.5 (C-2'), 133.6 (C-3'), 138.1 (C-1'), 146.8 (C-3), 156.8 (C-6), 157.2 (C-7a), 164.1 (2-CONH), 169.8 (acetyl COCH $\underline{\text{H}}$ 3).  $\nu_{\text{max}}$  (ATR)/cm $^{-1}$  3404 (N-H amide), 3351 (N-H amine), 2982 (C-H aromatic), 2936 (C-H alkane), 1740 (C=O carbonyl), 1645 (C=O amide), 1578 (C=C aromatic),

1432 (-C-H bending), 1234 (C-N aromatic), 1183 (C-O ether), 1074 (C-N aliphatic), 768 (C-Cl).  $m/z$  (ESI<sup>+</sup>): 442 (<sup>37</sup>ClMNa<sup>+</sup>, 40%), 440 (<sup>35</sup>ClMNa<sup>+</sup>, 100%). HRMS (ESI<sup>+</sup>) found (<sup>37</sup>ClMNa<sup>+</sup>): 442.0854 C<sub>20</sub>H<sub>20</sub><sup>37</sup>ClN<sub>3</sub>NaO<sub>3</sub>S requires 442.0781. Found (<sup>35</sup>ClMNa<sup>+</sup>): 440.0797 C<sub>20</sub>H<sub>20</sub><sup>35</sup>ClN<sub>3</sub>NaO<sub>3</sub>S requires 440.0806.

**1-(3-Amino-6-methyl-2-(naphthalen-1'-ylcarbamoyl)thieno[2,3-*b*]pyridin-5-yl)ethyl acetate **6d****

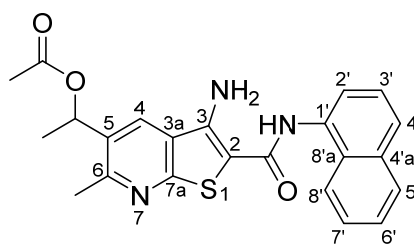

The reaction was carried out following General Procedure C using alcohol **5d** (20.0 mg, 0.05 mmol), DMAP (16.0 mg, 0.13 mmol) and acetic anhydride (0.01 mL, 0.11 mmol) in dry pyridine (0.40 mL) for 15 min then purified with flash chromatography (3:1 petroleum ether, ethyl acetate) to give the *title compound* **6d** (10.0 mg, 45%) as a pale yellow crystalline solid. m.p. 190-192 °C.  $\delta_H$  (400 MHz, (CD<sub>3</sub>)<sub>2</sub>SO) 1.57 (3H, d,  $J$  = 6.5 Hz, 5-CHCH<sub>3</sub>), 2.09 (3H, s, acetyl COCH<sub>3</sub>), 2.66 (3H, s, 6-CH<sub>3</sub>), 6.02 (1H, q,  $J$  = 6.5 Hz, 5-CHCH<sub>3</sub>), 7.34 (2H, br s, NH<sub>2</sub>), 7.52-7.56 (4H, m, 4 × Ar-CH), 7.83-7.87 (1H, m, Ar-CH), 7.91-7.93 (1H, m, Ar-CH), 7.96-7.98 (1H, m, Ar-CH), 8.52 (1H, s, H-4), 9.67 (1H, br s, NH).  $\delta_C$  (100 MHz, (CD<sub>3</sub>)<sub>2</sub>SO) 20.8 and 20.9 (5-CHCH<sub>3</sub> and acetyl COCH<sub>3</sub>), 22.3 (6-CH<sub>3</sub>), 68.4 (5-CHCH<sub>3</sub>), 96.2 (C-2), 123.5 (Ar-CH), 124.3 (Ar-CH), 124.6 (C-3a), 125.5 (Ar-CH), 125.86 (Ar-CH), 125.94 (Ar-CH), 126.2 (Ar-CH), 128.0 (Ar-CH), 128.1 (C-4), 129.7 (Ar-C), 131.9 (C-5), 133.7 (C-1'), 133.9 (Ar-C), 146.7 (C-3), 156.7 (C-6), 157.3 (C-7a), 164.8 (2-CONH), 169.8 (acetyl COCH<sub>3</sub>).  $\nu_{max}$  (ATR)/cm<sup>-1</sup> 3394 (N-H amide), 3308 (N-H amine), 2923 (C-H aromatic), 2852 (C-H alkane), 1731 (C=O carbonyl), 1607 (C=O amide), 1516 (C=C aromatic), 1464 (-C-H bending), 1236 (C-N aromatic), 1112 (C-O ether), 1089 (C-N aliphatic).  $m/z$  (ESI<sup>+</sup>): 420 (MH<sup>+</sup>, 100%), 413 (65%), 397 (20%), 382 (90%), 360 (45%). HRMS (ESI<sup>+</sup>) found (MH<sup>+</sup>): 420.1367 C<sub>23</sub>H<sub>22</sub>N<sub>3</sub>O<sub>3</sub>S requires 420.1376.

**1-(3-Amino-2-((4'-methoxyphenyl)carbamoyl)-6-methylthieno[2,3-*b*]pyridin-5-yl)ethyl acetate **6e****

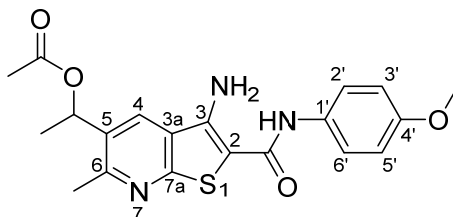

The reaction was carried out following General Procedure C using alcohol **5e** (20.0 mg, 0.06 mmol), DMAP (17.0 mg, 0.14 mmol) and acetic anhydride (0.01 mL, 0.11 mmol) in dry pyridine (1 mL) for 20 min then purified with flash chromatography (3:1 petroleum ether, ethyl acetate) to give the *title compound* **6e** (15.0 mg, 68%) as a pale yellow crystalline solid. m.p. > 230 °C.  $\delta_{\text{H}}$  (400 MHz,  $(\text{CD}_3)_2\text{SO}$ ) 1.56 (3H, d,  $J = 6.5$  Hz, 5-CHCH $\underline{\text{H}}$ 3), 2.08 (3H, s, acetyl COCH $\underline{\text{H}}$ 3), 2.63 (3H, s, 6-CH $\underline{\text{H}}$ 3), 3.74 (3H, s, 4'-OCH $\underline{\text{H}}$ 3), 6.00 (1H, q,  $J = 6.5$  Hz, 5-CHCH $\underline{\text{H}}$ 3), 6.89 (2H, d,  $J = 8.7$  Hz, H-3' and H-5'), 7.35 (2H, br s, NH $\underline{\text{H}}$ 2), 7.57 (2H, d,  $J = 8.7$  Hz, H-2' and H-6'), 8.50 (1H, s, H-4), 9.29 (1H, br s, NH).  $\delta_{\text{C}}$  (100 MHz,  $(\text{CD}_3)_2\text{SO}$ ) 20.8 and 20.9 (5-CHCH $\underline{\text{H}}$ 3 and acetyl COCH $\underline{\text{H}}$ 3), 22.2 (6-CH $\underline{\text{H}}$ 3), 55.2 (4'-OCH $\underline{\text{H}}$ 3), 68.4 (5-CHCH $\underline{\text{H}}$ 3), 96.2 (C-2), 113.5 (C-3' and C-5'), 122.9 (C-2' and C-6'), 124.6 (C-3a), 128.0 (C-4), 131.88 and 131.95 (C-1' and C-5), 146.6 (C-3), 155.5 (C-4'), 156.7 (C-6), 157.1 (C-7a), 163.7 (2-CONH), 169.8 (acetyl COCH $\underline{\text{H}}$ 3).  $\nu_{\text{max}}$  (ATR)/cm $^{-1}$  3431 (N-H amide), 3327 (N-H amine), 2982 (C-H aromatic), 2891 (C-H alkane), 1737 (C=O carbonyl), 1600 (C=O amide), 1509 (C=C aromatic), 1411 (-C-H bending), 1227 (C-N aromatic), 1168 (C-O ether), 1098 (C-N aliphatic).  $m/z$  (ESI $^{+}$ ): 422 (MNa $^{+}$ , 100%). HRMS (ESI $^{+}$ ) found (MNa $^{+}$ ): 422.1135 C $_{20}$ H $_{21}$ N $_3$ NaO $_4$ S requires 422.1145.

**1-(3-Amino-6-methyl-2-(phenylcarbamoyl)thieno[2,3-*b*]pyridin-5-yl)ethyl *tert*-butyl carbonate **7a****

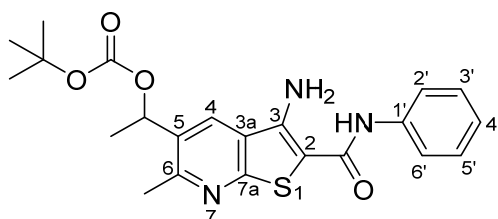

The reaction was carried out following General Procedure C using alcohol **5a** (30.0 mg, 0.09 mmol), DMAP (28.0 mg, 0.23 mmol) and Boc anhydride (40.0 mg, 0.18 mmol) in dry pyridine

(0.70 mL) for 15 min then purified with flash chromatography (3:1 petroleum ether, ethyl acetate) to give the *title compound* **7a** (15.0 mg, 38%) as a pale yellow crystalline solid. m.p. 190-192 °C.  $\delta_{\text{H}}$  (400 MHz,  $(\text{CD}_3)_2\text{SO}$ ) 1.39 (9H, s,  $3 \times t$ -butyl  $\text{CH}_3$ ), 1.56 (3H, d,  $J = 6.5$  Hz, 5-CHCH $\underline{\text{C}}\text{H}_3$ ), 2.65 (3H, s, 6-CH $\underline{\text{C}}\text{H}_3$ ), 5.88 (1H, q,  $J = 6.5$  Hz, 5-CHCH $\underline{\text{C}}\text{H}_3$ ), 7.07 (1H, tt,  $J = 7.4$ , 1.2 Hz, H-4'), 7.32 (2H, t,  $J = 7.4$  Hz, H-3' and H-5'), 7.44 (2H, br s,  $\text{NH}_2$ ), 7.69 (2H, d,  $J = 7.4$  Hz, H-2' and H-6'), 8.54 (1H, s, H-4), 9.39 (1H, br s, NH).  $\delta_{\text{C}}$  (100 MHz,  $(\text{CD}_3)_2\text{SO}$ ) 21.1 (5-CHCH $\underline{\text{C}}\text{H}_3$ ), 22.2 (6-CH $\underline{\text{C}}\text{H}_3$ ), 27.3 ( $3 \times t$ -butyl  $\text{CH}_3$ ), 71.2 (5-CHCH $\underline{\text{C}}\text{H}_3$ ), 81.9 ( $t$ -butyl quat.), 96.0 (C-2), 121.1 (C-2' and C-6'), 123.3 (C-4'), 124.5 (C-3a), 128.1 (C-4), 128.4 (C-3' and C-5'), 131.9 (C-5), 139.0 (C-1'), 147.0 (C-3), 152.3 (carbonate C=O), 156.7 (C-6), 157.3 (C-7a), 163.9 (2-CONH).  $\nu_{\text{max}}$  (ATR)/ $\text{cm}^{-1}$  3409 (N-H amide), 3303 (N-H amine), 2983 (C-H aromatic), 2852 (C-H alkane), 1731 (C=O carbonyl), 1630 (C=O amide), 1591 (C=C aromatic), 1432 (-C-H bending), 1251 (C-N aromatic), 1163 (C-O ether), 1082 (C-N aliphatic).  $m/z$  (ESI $^+$ ): 428 (MH $^+$ , 100%), 372 (20%), 332 (40%). HRMS (ESI $^+$ ) found (MH $^+$ ): 428.1626  $\text{C}_{22}\text{H}_{26}\text{N}_3\text{O}_4\text{S}$  requires 428.1639.

**1-(3-Amino-6-methyl-2-(*o*-tolylcarbamoylethylthieno[2,3-*b*]pyridin-5-yl)ethyl *tert*-butyl carbonate **7b****

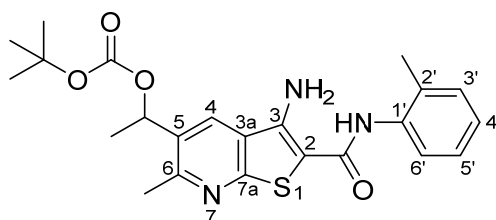

The reaction was carried out following General Procedure C using alcohol **5b** (70.0 mg, 0.21 mmol), DMAP (63.0 mg, 0.51 mmol) and Boc anhydride (89.0 mg, 0.41 mmol) in dry pyridine (1.5 mL) for 30 min then purified with flash chromatography (3:1 petroleum ether, ethyl acetate) to give the *title compound* **7b** (25.0 mg, 27%) as a pale yellow crystalline solid. m.p. 187-189 °C.  $\delta_{\text{H}}$  (400 MHz,  $(\text{CD}_3)_2\text{SO}$ ) 1.39 (9H, s,  $3 \times t$ -butyl  $\text{CH}_3$ ), 1.56 (3H, d,  $J = 6.5$  Hz, 5-CHCH $\underline{\text{C}}\text{H}_3$ ), 2.22 (3H, s, 2'-CH $\underline{\text{C}}\text{H}_3$ ), 2.65 (3H, s, 6-CH $\underline{\text{C}}\text{H}_3$ ), 5.87 (1H, q,  $J = 6.5$  Hz, 5-CHCH $\underline{\text{C}}\text{H}_3$ ), 7.15 (1H, td,  $J = 7.3$ , 1.3 Hz, H-4'), 7.19 (1H, td,  $J = 7.3$ , 1.3 Hz, H-5'), 7.25 (1H, dd,  $J = 7.3$ , 1.3 Hz, H-3'), 7.31 (1H, dd,  $J = 7.3$ , 1.3 Hz, H-6'), 7.32 (2H, br s,  $\text{NH}_2$ ), 8.52 (1H, s, H-4), 9.09 (1H, br s, NH).  $\delta_{\text{C}}$  (100 MHz,  $(\text{CD}_3)_2\text{SO}$ ) 17.9 (2'-CH $\underline{\text{C}}\text{H}_3$ ), 21.1 (5-CHCH $\underline{\text{C}}\text{H}_3$ ), 22.2 (6-CH $\underline{\text{C}}\text{H}_3$ ), 27.3 ( $3 \times t$ -butyl  $\text{CH}_3$ ), 71.2 (5-CHCH $\underline{\text{C}}\text{H}_3$ ), 81.9 ( $t$ -butyl quat.), 96.4 (C-2), 124.7 (C-3a), 125.8 and 125.9 (C-4' and C-5'), 126.9 (C-6'), 128.0 (C-4), 130.1 (C-3'), 131.8 (C-5), 134.0 (C-2'), 136.4

(C-1'), 146.4 (C-3), 152.3 (carbonate C=O), 156.5 (C-6), 157.3 (C-7a), 163.9 (2-CONH).  $\nu_{\text{max}}$  (ATR)/ $\text{cm}^{-1}$  3400 (N-H amide), 3279 (N-H amine), 2978 (C-H aromatic), 2880 (C-H alkane), 1739 (C=O carbonyl), 1609 (C=O amide), 1513 (C=C aromatic), 1283 (C-N aromatic), 1165 (C-O ether), 1089 (C-N aliphatic).  $m/z$  (ESI<sup>+</sup>): 442 (MH<sup>+</sup>, 100%), 386 (20%), 346 (60%). HRMS (ESI<sup>+</sup>) found (MH<sup>+</sup>): 442.1787 C<sub>23</sub>H<sub>28</sub>N<sub>3</sub>O<sub>4</sub>S requires 442.1795.

**1-(3-Amino-2-((3'-chloro-2'-methylphenyl)carbamoyl)-6-methylthieno[2,3-*b*]pyridin-5-yl)ethyl *tert*-butyl carbonate 7c**

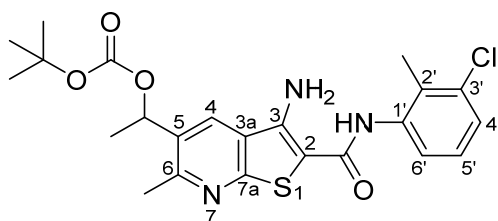

The reaction was carried out following General Procedure C using alcohol **5c** (40.0 mg, 0.11 mmol), DMAP (32.0 mg, 0.27 mmol) and Boc anhydride (46.0 mg, 0.21 mmol) in dry pyridine (1.0 mL) for 15 min then purified with flash chromatography (3:1 petroleum ether, ethyl acetate) to give the *title compound* **7c** (10.0 mg, 20%) as a pale yellow crystalline solid. m.p. 199-201 °C.  $\delta_{\text{H}}$  (400 MHz, (CD<sub>3</sub>)<sub>2</sub>SO) 1.39 (9H, s, 3 × *t*-butyl CH<sub>3</sub>), 1.56 (3H, d,  $J$  = 6.5 Hz, 5-CHCH<sub>3</sub>), 2.23 (3H, s, 2'-CH<sub>3</sub>), 2.65 (3H, s, 6-CH<sub>3</sub>), 5.87 (1H, q,  $J$  = 6.5 Hz, 5-CHCH<sub>3</sub>), 7.22 (1H, t,  $J$  = 7.8 Hz, H-5'), 7.27 (1H, dd,  $J$  = 7.8, 1.4 Hz, H-6'), 7.34 (1H, dd,  $J$  = 7.8, 1.4 Hz, H-4'), 7.36 (2H, br s, NH<sub>2</sub>), 8.53 (1H, s, H-4), 9.36 (1H, br s, NH).  $\delta_{\text{C}}$  (100 MHz, (CD<sub>3</sub>)<sub>2</sub>SO) 15.4 (2'-CH<sub>3</sub>), 21.1 (5-CHCH<sub>3</sub>), 22.2 (6-CH<sub>3</sub>), 27.3 (3 × *t*-butyl CH<sub>3</sub>), 71.2 (5-CHCH<sub>3</sub>), 81.9 (*t*-butyl quat.), 95.8 (C-2), 124.6 (C-3a), 126.2 (C-6'), 126.6 (C-4'), 126.7 (C-5'), 128.1 (C-4), 131.9 (C-5), 132.5 (C-2'), 133.6 (C-3'), 138.1 (C-1'), 146.8 (C-3), 152.2 (carbonate C=O), 156.6 (C-6), 157.3 (C-7a), 164.1 (2-CONH).  $\nu_{\text{max}}$  (ATR)/ $\text{cm}^{-1}$  3406 (N-H amide), 3290 (N-H amine), 2927 (C-H aromatic), 2845 (C-H alkane), 1742 (C=O carbonyl), 1607 (C=O amide), 1510 (C=C aromatic), 1460 (-C-H bending), 1283 (C-N aromatic), 1168 (C-O ether), 1088 (C-N aliphatic), 779 (C-Cl).  $m/z$  (ESI<sup>+</sup>): 478 (<sup>37</sup>ClMH<sup>+</sup>, 40%), 476 (<sup>35</sup>ClMH<sup>+</sup>, 100%), 413 (43%), 380 (55%). HRMS (ESI<sup>+</sup>) found (<sup>37</sup>ClMH<sup>+</sup>): 478.1369 C<sub>23</sub>H<sub>27</sub><sup>37</sup>ClN<sub>3</sub>O<sub>4</sub>S requires 478.1383. Found (<sup>35</sup>ClMH<sup>+</sup>): 476.1392 C<sub>23</sub>H<sub>27</sub><sup>35</sup>ClN<sub>3</sub>O<sub>4</sub>S requires 476.1405.

**1-(3-Amino-6-methyl-2-(naphthalen-1'-ylcarbonyl)thieno[2,3-*b*]pyridin-5-yl)ethyl *tert*-butyl carbonate 7d**

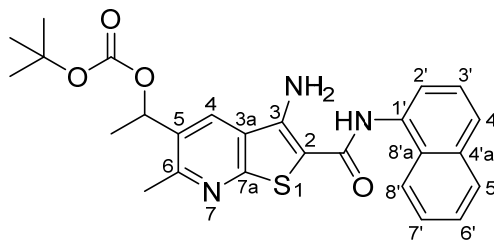

The reaction was carried out following General Procedure C using alcohol **5d** (0.10 g, 0.27 mmol), DMAP (81.0 mg, 0.66 mmol) and Boc anhydride (0.12 g, 0.53 mmol) in dry pyridine (2.0 mL) for 20 min then purified with flash chromatography (3:1 petroleum ether, ethyl acetate) to give the *title compound* **7d** (20.0 mg, 17%) as a pale yellow crystalline solid. m.p. 202-204 °C.  $\delta_{\text{H}}$  (400 MHz, (CD<sub>3</sub>)<sub>2</sub>SO) 1.40 (9H, s, 3 × *t*-butyl CH<sub>3</sub>), 1.57 (3H, d,  $J$  = 6.5 Hz, 5-CHCH<sub>3</sub>), 2.67 (3H, s, 6-CH<sub>3</sub>), 5.89 (1H, q,  $J$  = 6.5 Hz, 5-CHCH<sub>3</sub>), 7.36 (2H, br s, NH<sub>2</sub>), 7.53-7.56 (4H, m, 4 × Ar-CH), 7.84-7.87 (1H, m, Ar-CH), 7.91-7.93 (1H, m, Ar-CH), 7.95-7.98 (1H, m, Ar-CH), 8.54 (1H, s, H-4), 9.67 (1H, br s, NH).  $\delta_{\text{C}}$  (100 MHz, (CD<sub>3</sub>)<sub>2</sub>SO) 21.2 (5-CHCH<sub>3</sub>), 22.3 (6-CH<sub>3</sub>), 27.3 (3 × *t*-butyl CH<sub>3</sub>), 71.2 (5-CHCH<sub>3</sub>), 81.9 (*t*-butyl quat.), 96.2 (C-2), 123.5 (Ar-CH), 124.4 (Ar-CH), 124.6 (C-3a), 125.5 (Ar-CH), 125.9 (Ar-CH), 126.0 (Ar-CH), 126.2 (Ar-CH), 127.99 (Ar-CH), 128.04 (C-4), 129.7 (Ar-C), 131.8 (C-5), 133.7 (C-1'), 133.9 (Ar-C), 146.8 (C-3), 152.3 (carbonate C=O), 156.6 (C-6), 157.4 (C-7a), 164.8 (2-CONH).  $\nu_{\text{max}}$  (ATR)/cm<sup>-1</sup> 3400 (N-H amide), 3285 (N-H amine), 2978 (C-H aromatic), 2923 (C-H alkane), 1734 (C=O carbonyl), 1605 (C=O amide), 1501 (C=C aromatic), 1262 (C-N aromatic), 1158 (C-O ether), 1081 (C-N aliphatic).  $m/z$  (ESI<sup>+</sup>): 500 (MNa<sup>+</sup>, 100%), 478 (50%), 413 (35%). HRMS (ESI<sup>+</sup>) found (MNa<sup>+</sup>): 500.1606 C<sub>26</sub>H<sub>27</sub>N<sub>3</sub>NaO<sub>4</sub>S requires 500.1614.

**1-(3-Amino-2-((4'-methoxyphenyl)carbamoyl)-6-methylthieno[2,3-*b*]pyridin-5-yl)ethyl  
*tert*-butyl carbonate **7e****

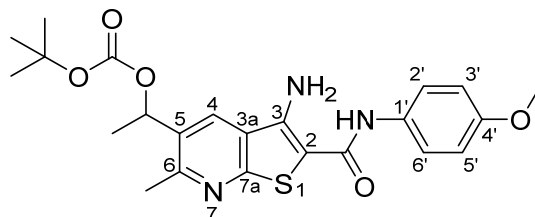

The reaction was carried out following General Procedure C using alcohol **5e** (60.0 mg, 0.17 mmol), DMAP (51.0 mg, 0.42 mmol) and Boc anhydride (73.0 mg, 0.42 mmol) in dry pyridine (1.3 mL) for 15 min then purified with flash chromatography (3:1 petroleum ether, ethyl acetate) to give the *title compound* **7e** (20.0 mg, 26%) as a pale yellow crystalline solid. m.p. 196-198 °C.  $\delta_{\text{H}}$  (400 MHz,  $(\text{CD}_3)_2\text{SO}$ ) 1.39 (9H, s, 3  $\times$  *t*-butyl  $\text{CH}_3$ ), 1.56 (3H, d,  $J$  = 6.5 Hz, 5- $\text{CHCH}_3$ ), 2.65 (3H, s, 6- $\text{CH}_3$ ), 3.74 (3H, s, 4'- $\text{OCH}_3$ ), 5.87 (1H, q,  $J$  = 6.5 Hz, 5- $\text{CHCH}_3$ ), 6.89 (2H, d,  $J$  = 8.9 Hz, H-3' and H-5'), 7.38 (2H, br s,  $\text{NH}_2$ ), 7.57 (2H, d,  $J$  = 8.9 Hz, H-2' and H-6'), 8.52 (1H, s, H-4), 9.29 (1H, br s, NH).  $\delta_{\text{C}}$  (100 MHz,  $(\text{CD}_3)_2\text{SO}$ ) 21.1 (5- $\text{CHCH}_3$ ), 22.2 (6- $\text{CH}_3$ ), 27.3 (3  $\times$  *t*-butyl  $\text{CH}_3$ ), 55.1 (4'- $\text{OCH}_3$ ), 71.2 (5- $\text{CHCH}_3$ ), 81.9 (*t*-butyl quat.), 96.2 (C-2), 113.5 (C-3' and C-5'), 122.9 (C-2' and C-6'), 124.6 (C-3a), 128.0 (C-4), 131.8 and 131.9 (C-1' and C-5), 146.6 (C-3), 152.3 (carbonate C=O), 155.5 (C-4'), 156.5 (C-6), 157.3 (C-7a), 163.7 (2-CONH).  $\nu_{\text{max}}$  (ATR)/ $\text{cm}^{-1}$  3408 (N-H amide), 3292 (N-H amine), 2981 (C-H aromatic), 2925 (C-H alkane), 1745 (C=O carbonyl), 1603 (C=O amide), 1506 (C=C aromatic), 1465 (-C-H bending), 1248 (C-N aromatic), 1166 (C-O ether), 1092 (C-N aliphatic).  $m/z$  (ESI<sup>+</sup>): 480 ( $\text{MNa}^+$ , 45%), 402 (35%), 362 (100%), 275 (50%). HRMS (ESI<sup>+</sup>) found ( $\text{MNa}^+$ ): 480.1561  $\text{C}_{23}\text{H}_{27}\text{N}_3\text{NaO}_5\text{S}$  requires 480.1564.

**1-(3-Amino-6-methyl-2-(phenylcarbamoyl)thieno[2,3-*b*]pyridin-5-yl)ethyl methyl carbonate 8a**

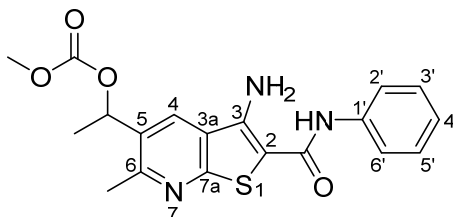

The reaction was carried out following General Procedure C using alcohol **5a** (90.0 mg, 0.28 mmol), DMAP (67.0 mg, 0.55 mmol) and methyl chloroformate (0.02 mL, 0.28 mmol) in dry pyridine (2.0 mL) for 15 min then purified with flash chromatography (3:1 petroleum ether, ethyl acetate) to give the *title compound* **8a** (20.0 mg, 22%) as a pale yellow crystalline solid. m.p. 194-196 °C.  $\delta_{\text{H}}$  (400 MHz,  $(\text{CD}_3)_2\text{SO}$ ) 1.60 (3H, d,  $J = 6.5$  Hz, 5-CHCH $\underline{\text{H}}$ 3), 2.67 (3H, s, 6-CH $\underline{\text{H}}$ 3), 3.69 (3H, s, OCH $\underline{\text{H}}$ 3), 5.94 (1H, q,  $J = 6.5$  Hz, 5-CHCH $\underline{\text{H}}$ 3), 7.07 (1H, tt,  $J = 7.5, 1.2$  Hz, H-4'), 7.32 (2H, t,  $J = 7.5$  Hz, H-3' and H-5'), 7.42 (2H, br s, NH $\underline{\text{H}}$ 2), 7.69 (2H, d,  $J = 7.5$  Hz, H-2' and H-6'), 8.55 (1H, s, H-4), 9.40 (1H, br s, NH).  $\delta_{\text{C}}$  (100 MHz,  $(\text{CD}_3)_2\text{SO}$ ) 21.1 (5-CHCH $\underline{\text{H}}$ 3), 22.3 (6-CH $\underline{\text{H}}$ 3), 54.7 (OCH $\underline{\text{H}}$ 3), 72.3 (5-CHCH $\underline{\text{H}}$ 3), 96.1 (C-2), 121.1 (C-2' and C-6'), 123.3 (C-4'), 124.5 (C-3a), 128.3 (C-4), 128.4 (C-3' and C-5'), 131.5 (C-5), 139.0 (C-1'), 147.0 (C-3), 154.5 (carbonate C=O), 156.8 (C-6), 157.4 (C-7a), 163.9 (2-CONH).  $\nu_{\text{max}}$  (ATR)/cm $^{-1}$  3449 (N-H amide), 3327 (N-H amine), 2926 (C-H aromatic), 2852 (C-H alkane), 1741 (C=O carbonyl), 1626 (C=O amide), 1588 (C=C aromatic), 1495 (-C-H bending), 1255 (C-N aromatic), 1100 (C-O ether), 1071 (C-N aliphatic).  $m/z$  (ESI $^{+}$ ): 386 (MH $^{+}$ , 100%), 332 (45%). HRMS (ESI $^{+}$ ) found (MH $^{+}$ ): 386.1163 C $_{19}$ H $_{20}$ N $_3$ O $_4$ S requires 386.1169.

**1-(3-Amino-6-methyl-2-(o-tolylcarbamoyl)thieno[2,3-*b*]pyridin-5-yl)ethyl methyl carbonate 8b**

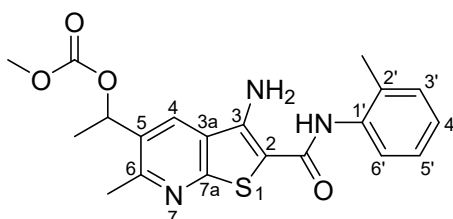

The reaction was carried out following General Procedure C using alcohol **5b** (0.10 g, 0.29 mmol), DMAP (72.0 mg, 0.59 mmol) and methyl chloroformate (0.02 mL, 0.29 mmol) in dry



pyridine (2.0 mL) for 15 min then purified with flash chromatography (3:1 petroleum ether, ethyl acetate) to give the *title compound* **8b** (40.0 mg, 40%) as a pale yellow crystalline solid. m.p. 213-215 °C.  $\delta_{\text{H}}$  (400 MHz,  $(\text{CD}_3)_2\text{SO}$ ) 1.60 (3H, d,  $J = 6.5$  Hz, 5-CHCH $\underline{\text{H}}$ <sub>3</sub>), 2.22 (3H, s, 2'-CH<sub>3</sub>), 2.66 (3H, s, 6-CH<sub>3</sub>), 3.69 (3H, s, OCH<sub>3</sub>), 5.94 (1H, q,  $J = 6.5$  Hz, 5-CH $\underline{\text{H}}$ CH<sub>3</sub>), 7.15 (1H, td,  $J = 7.3, 1.3$  Hz, H-4'), 7.20 (1H, td,  $J = 7.3, 1.3$  Hz, H-5'), 7.25 (1H, dd,  $J = 7.3, 1.3$  Hz, H-3'), 7.30 (2H, br s, NH<sub>2</sub>), 7.31 (1H, dd,  $J = 7.3, 1.3$  Hz, H-6'), 8.53 (1H, s, H-4), 9.10 (1H, br s, NH).  $\delta_{\text{C}}$  (100 MHz,  $(\text{CD}_3)_2\text{SO}$ ) 17.9 (2'-CH<sub>3</sub>), 21.1 (5-CH $\underline{\text{H}}$ CH<sub>3</sub>), 22.3 (6-CH<sub>3</sub>), 54.7 (OCH<sub>3</sub>), 72.4 (5-CHCH<sub>3</sub>), 96.5 (C-2), 124.7 (C-3a), 125.8 and 125.9 (C-4' and C-5'), 126.9 (C-6'), 128.2 (C-4), 130.2 (C-3'), 131.4 (C-5), 133.9 (C-2'), 136.4 (C-1'), 146.4 (C-3), 154.5 (carbonate C=O), 156.6 (C-6), 157.4 (C-7a), 163.9 (2-CONH).  $\nu_{\text{max}}$  (ATR)/cm<sup>-1</sup> 3400 (N-H amide), 3291 (N-H amine), 2955 (C-H aromatic), 2850 (C-H alkane), 1747 (C=O carbonyl), 1609 (C=O amide), 1596 (C=C aromatic), 1439 (-C-H bending), 1262 (C-N aromatic), 1108 (C-O ether), 1069 (C-N aliphatic).  $m/z$  (ESI<sup>+</sup>): 400 (MH<sup>+</sup>, 100%), 346 (73%). HRMS (ESI<sup>+</sup>) found (MH<sup>+</sup>): 400.1314 C<sub>20</sub>H<sub>22</sub>N<sub>3</sub>O<sub>4</sub>S requires 400.1326

**1-(3-Amino-2-((3'-chloro-2'-methylphenyl)carbamoyl)-6-methylthieno[2,3-*b*]pyridin-5-yl)ethyl methyl carbonate **8c****

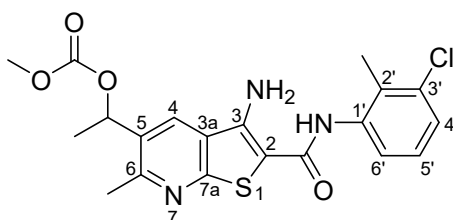

The reaction was carried out following General Procedure C using alcohol **5c** (30.0 mg, 0.08 mmol), DMAP (19.0 mg, 0.18 mmol) and methyl chloroformate (0.01 mL, 0.08 mmol) in dry pyridine (1.0 mL) for 15 min then purified with flash chromatography (3:1 petroleum ether, ethyl acetate) to give the *title compound* **8c** (10.0 mg, 33%) as a pale yellow crystalline solid. m.p. 202-204 °C.  $\delta_{\text{H}}$  (400 MHz,  $(\text{CD}_3)_2\text{SO}$ ) 1.60 (3H, d,  $J = 6.5$  Hz, 5-CHCH $\underline{\text{H}}$ <sub>3</sub>), 2.23 (3H, s, 2'-CH<sub>3</sub>), 2.67 (3H, s, 6-CH<sub>3</sub>), 3.69 (3H, s, OCH<sub>3</sub>), 5.94 (1H, q,  $J = 6.5$  Hz, 5-CH $\underline{\text{H}}$ CH<sub>3</sub>), 7.23 (1H, t,  $J = 7.8$  Hz, H-5'), 7.28 (1H, dd,  $J = 7.8, 1.4$  Hz, H-6'), 7.33-7.35 (3H, m, H-4' and NH<sub>2</sub>), 8.54 (1H, s, H-4), 9.36 (1H, br s, NH).  $\delta_{\text{C}}$  (100 MHz,  $(\text{CD}_3)_2\text{SO}$ ) 15.4 (2'-CH<sub>3</sub>), 21.1 (5-CH $\underline{\text{H}}$ CH<sub>3</sub>), 22.3 (6-CH<sub>3</sub>), 54.7 (OCH<sub>3</sub>), 72.3 (5-CHCH<sub>3</sub>), 95.8 (C-2), 124.6 (C-3a), 126.2 (C-6'), 126.6 (C-4'), 126.7 (C-5'), 128.3 (C-4), 131.5 (C-5), 132.5 (C-2'), 133.6 (C-3'), 138.1 (C-1'), 146.8 (C-3), 154.5 (carbonate C=O), 156.7 (C-6), 157.5 (C-7a), 164.1 (2-CONH).  $\nu_{\text{max}}$

(ATR)/cm<sup>-1</sup> 3400 (N-H amide), 3291 (N-H amine), 2952 (C-H aromatic), 2851 (C-H alkane), 1747 (C=O carbonyl), 1607 (C=O amide), 1590 (C=C aromatic), 1436 (-C-H bending), 1240 (C-N aromatic), 1106 (C-O ether), 1071 (C-N aliphatic), 774 (C-Cl). *m/z* (ESI<sup>+</sup>): 436 (<sup>37</sup>ClMH<sup>+</sup>, 40%), 434 (<sup>35</sup>ClMH<sup>+</sup>, 100%), 380 (45%). HRMS (ESI<sup>+</sup>) found (<sup>37</sup>ClMH<sup>+</sup>): 436.0903 C<sub>20</sub>H<sub>21</sub><sup>37</sup>ClN<sub>3</sub>O<sub>4</sub>S requires 436.0912. Found (<sup>35</sup>ClMH<sup>+</sup>): 434.0930 C<sub>20</sub>H<sub>21</sub><sup>35</sup>ClN<sub>3</sub>O<sub>4</sub>S requires 434.0936.

**1-(3-Amino-6-methyl-2-(naphthalen-1'-ylcarbamoyl)thieno[2,3-*b*]pyridin-5-yl)ethyl methyl carbonate **8d****

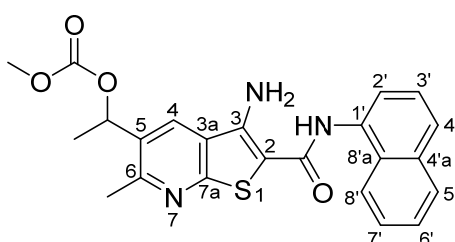

The reaction was carried out following General Procedure C using alcohol **5d** (60.0 mg, 0.16 mmol), DMAP (39.0 mg, 0.32 mmol) and methyl chloroformate (0.01 mL, 0.16 mmol) in dry pyridine (1.0 mL) for 15 min then purified with flash chromatography (3:1 petroleum ether, ethyl acetate) to give the *title compound* **8d** (28.0 mg, 47%) as a pale yellow crystalline solid. m.p. 188-190 °C.  $\delta_H$  (400 MHz, (CD<sub>3</sub>)<sub>2</sub>SO) 1.61 (3H, d, *J* = 6.5 Hz, 5-CHCH<sub>3</sub>), 2.68 (3H, s, 6-CH<sub>3</sub>), 3.70 (3H, s, OCH<sub>3</sub>), 5.96 (1H, q, *J* = 6.5 Hz, 5-CHCH<sub>3</sub>), 7.35 (2H, br s, NH<sub>2</sub>), 7.53-7.56 (4H, m, 4 × Ar-CH), 7.84-7.88 (1H, m, Ar-CH), 7.91-7.94 (1H, m, Ar-CH), 7.96-7.98 (1H, m, Ar-CH), 8.56 (1H, s, H-4), 9.68 (1H, br s, NH).  $\delta_C$  (100 MHz, (CD<sub>3</sub>)<sub>2</sub>SO) 21.1 (5-CHCH<sub>3</sub>), 22.3 (6-CH<sub>3</sub>), 54.8 (OCH<sub>3</sub>), 72.4 (5-CHCH<sub>3</sub>), 96.3 (C-2), 123.4 (Ar-CH), 124.3 (Ar-CH), 124.6 (C-3a), 125.5 (Ar-CH), 125.87 (Ar-CH), 125.95 (Ar-CH), 126.2 (Ar-CH), 128.0 (Ar-CH), 128.3 (C-4), 129.7 (Ar-C), 131.4 (C-5), 133.7 (C-1'), 133.9 (Ar-C), 146.7 (C-3), 154.5 (carbonate C=O), 156.7 (C-6), 157.6 (C-7a), 164.8 (2-CONH).  $\nu_{max}$  (ATR)/cm<sup>-1</sup> 3393 (N-H amide), 3308 (N-H amine), 2985 (C-H aromatic), 2851 (C-H alkane), 1748 (C=O carbonyl), 1607 (C=O amide), 1501 (C=C aromatic), 1439 (-C-H bending), 1259 (C-N aromatic), 1106 (C-O ether), 1067 (C-N aliphatic). *m/z* (ESI<sup>+</sup>): 436 (MH<sup>+</sup>, 100%), 382 (73%). HRMS (ESI<sup>+</sup>) found (MH<sup>+</sup>): 436.1318 C<sub>23</sub>H<sub>22</sub>N<sub>3</sub>O<sub>4</sub>S requires 436.1326.

**1-(3-Amino-2-((4'-methoxyphenyl)carbamoyl)-6-methylthieno[2,3-*b*]pyridin-5-yl)ethyl methyl carbonate **8e****

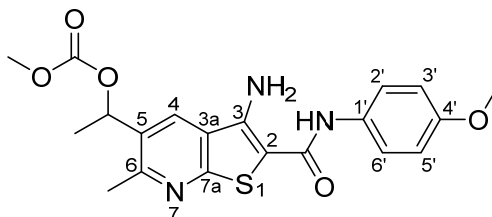

The reaction was carried out following General Procedure C using alcohol **5e** (90.0 mg, 0.25 mmol), DMAP (62.0 mg, 0.50 mmol) and methyl chloroformate (0.02 mL, 0.25 mmol) in dry pyridine (2.0 mL) for 15 min then purified with flash chromatography (3:1 petroleum ether, ethyl acetate) to give the *title compound* **8e** (25.0 mg, 28%) as a pale yellow crystalline solid. m.p. > 230 °C.  $\delta_{\text{H}}$  (400 MHz,  $(\text{CD}_3)_2\text{SO}$ ) 1.60 (3H, d,  $J = 6.5$  Hz, 5-CHCH $\underline{\text{C}}\text{H}_3$ ), 2.66 (3H, s, 6-CH $\underline{\text{C}}\text{H}_3$ ), 3.69 (3H, s, OCH $\underline{\text{C}}\text{H}_3$ ), 3.74 (3H, s, 4'-OCH $\underline{\text{C}}\text{H}_3$ ), 5.93 (1H, q,  $J = 6.5$  Hz, 5-CHCH $\underline{\text{C}}\text{H}_3$ ), 6.89 (2H, d,  $J = 8.9$  Hz, H-3' and H-5'), 7.37 (2H, br s, NH $\underline{\text{C}}\text{H}_2$ ), 7.57 (2H, d,  $J = 8.9$  Hz, H-2' and H-6'), 8.53 (1H, s, H-4), 9.29 (1H, br s, NH).  $\delta_{\text{C}}$  (100 MHz,  $(\text{CD}_3)_2\text{SO}$ ) 21.1 (5-CHCH $\underline{\text{C}}\text{H}_3$ ), 22.2 (6-CH $\underline{\text{C}}\text{H}_3$ ), 54.7 (OCH $\underline{\text{C}}\text{H}_3$ ), 55.1 (4'-OCH $\underline{\text{C}}\text{H}_3$ ), 72.3 (5-CHCH $\underline{\text{C}}\text{H}_3$ ), 96.2 (C-2), 113.5 (C-3' and C-5'), 122.9 (C-2' and C-6'), 124.6 (C-3a), 128.2 (C-4), 131.4 (C-5), 131.9 (C-1'), 146.6 (C-3), 154.5 (carbonate C=O), 155.5 (C-4'), 156.6 (C-6), 157.4 (C-7a), 163.7 (2-CONH).  $\nu_{\text{max}}$  (ATR)/ $\text{cm}^{-1}$  3413 (N-H amide), 3295 (N-H amine), 2955 (C-H aromatic), 2850 (C-H alkane), 1752 (C=O carbonyl), 1601 (C=O amide), 1507 (C=C aromatic), 1464 (-C-H bending), 1263 (C-N aromatic), 1106 (C-O ether), 1071 (C-N aliphatic).  $m/z$  (ESI $^+$ ): 416 (MH $^+$ , 100%). HRMS (ESI $^+$ ) found (MH $^+$ ): 416.1265 C $_{20}$ H $_{22}$ N $_3$ O $_5$ S requires 416.1275.

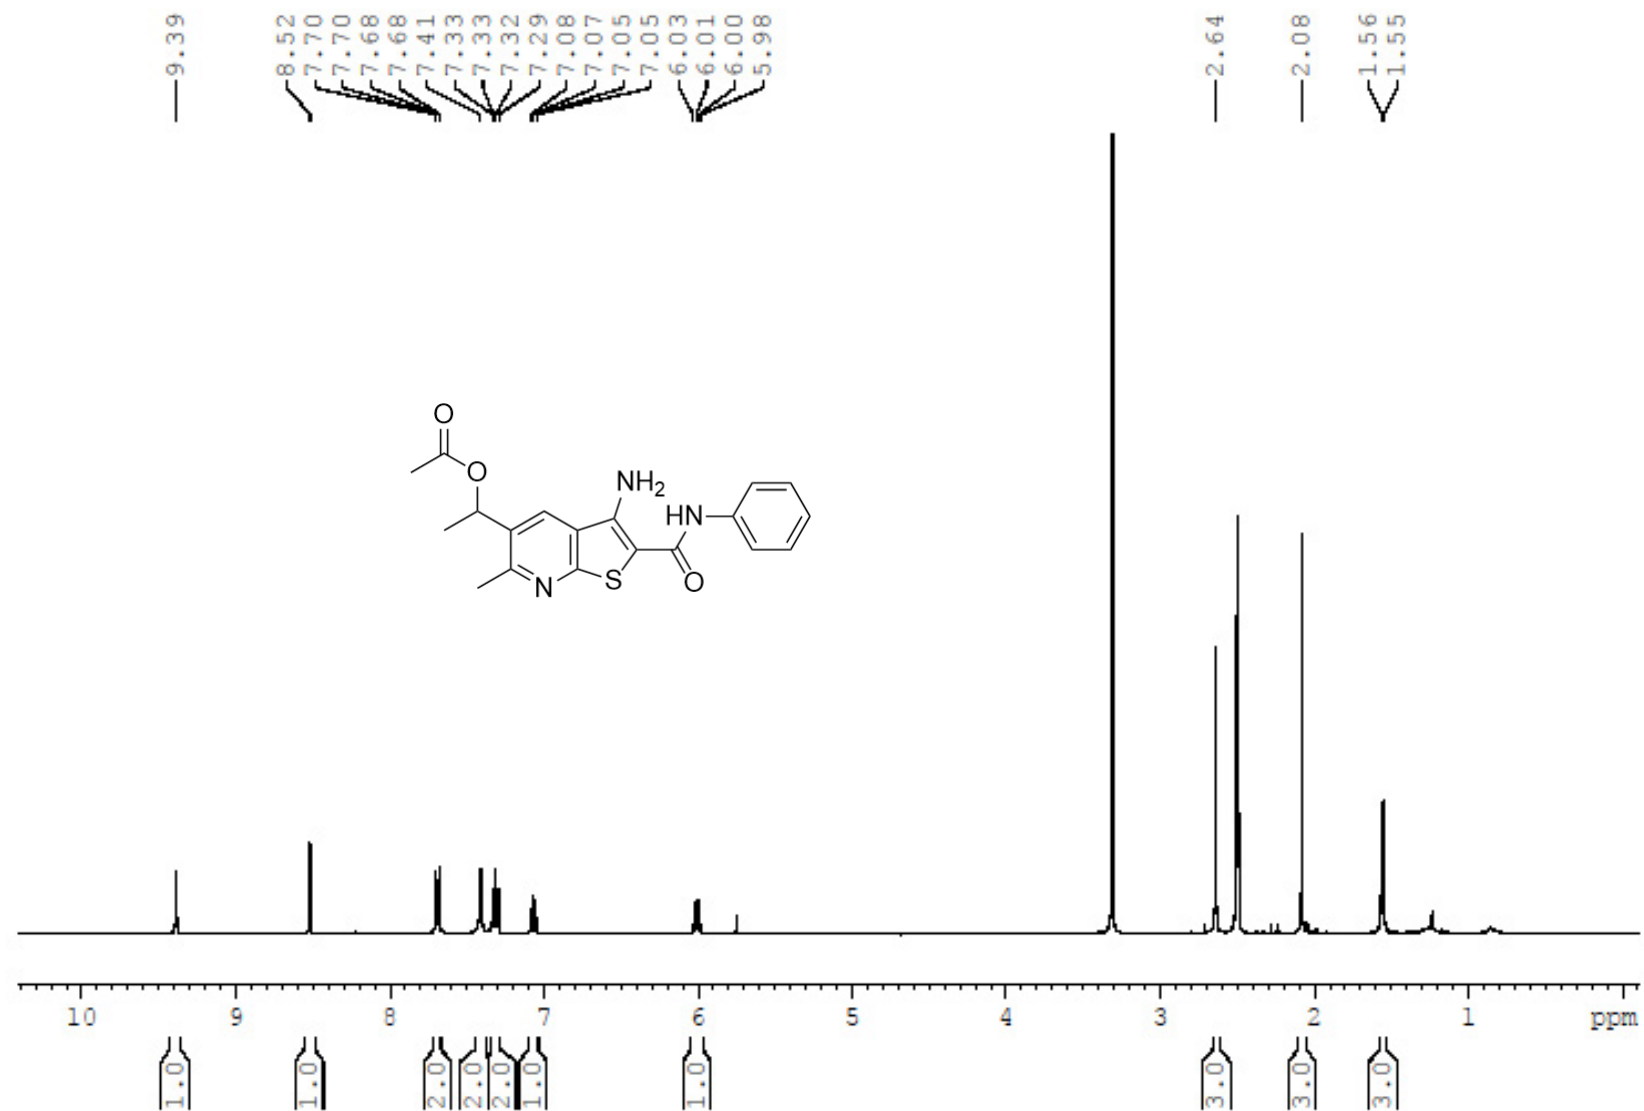

**Figure S1:**  $^1\text{H}$  NMR spectrum of **6a** (400 MHz;  $\text{DMSO-}d_6$ ).

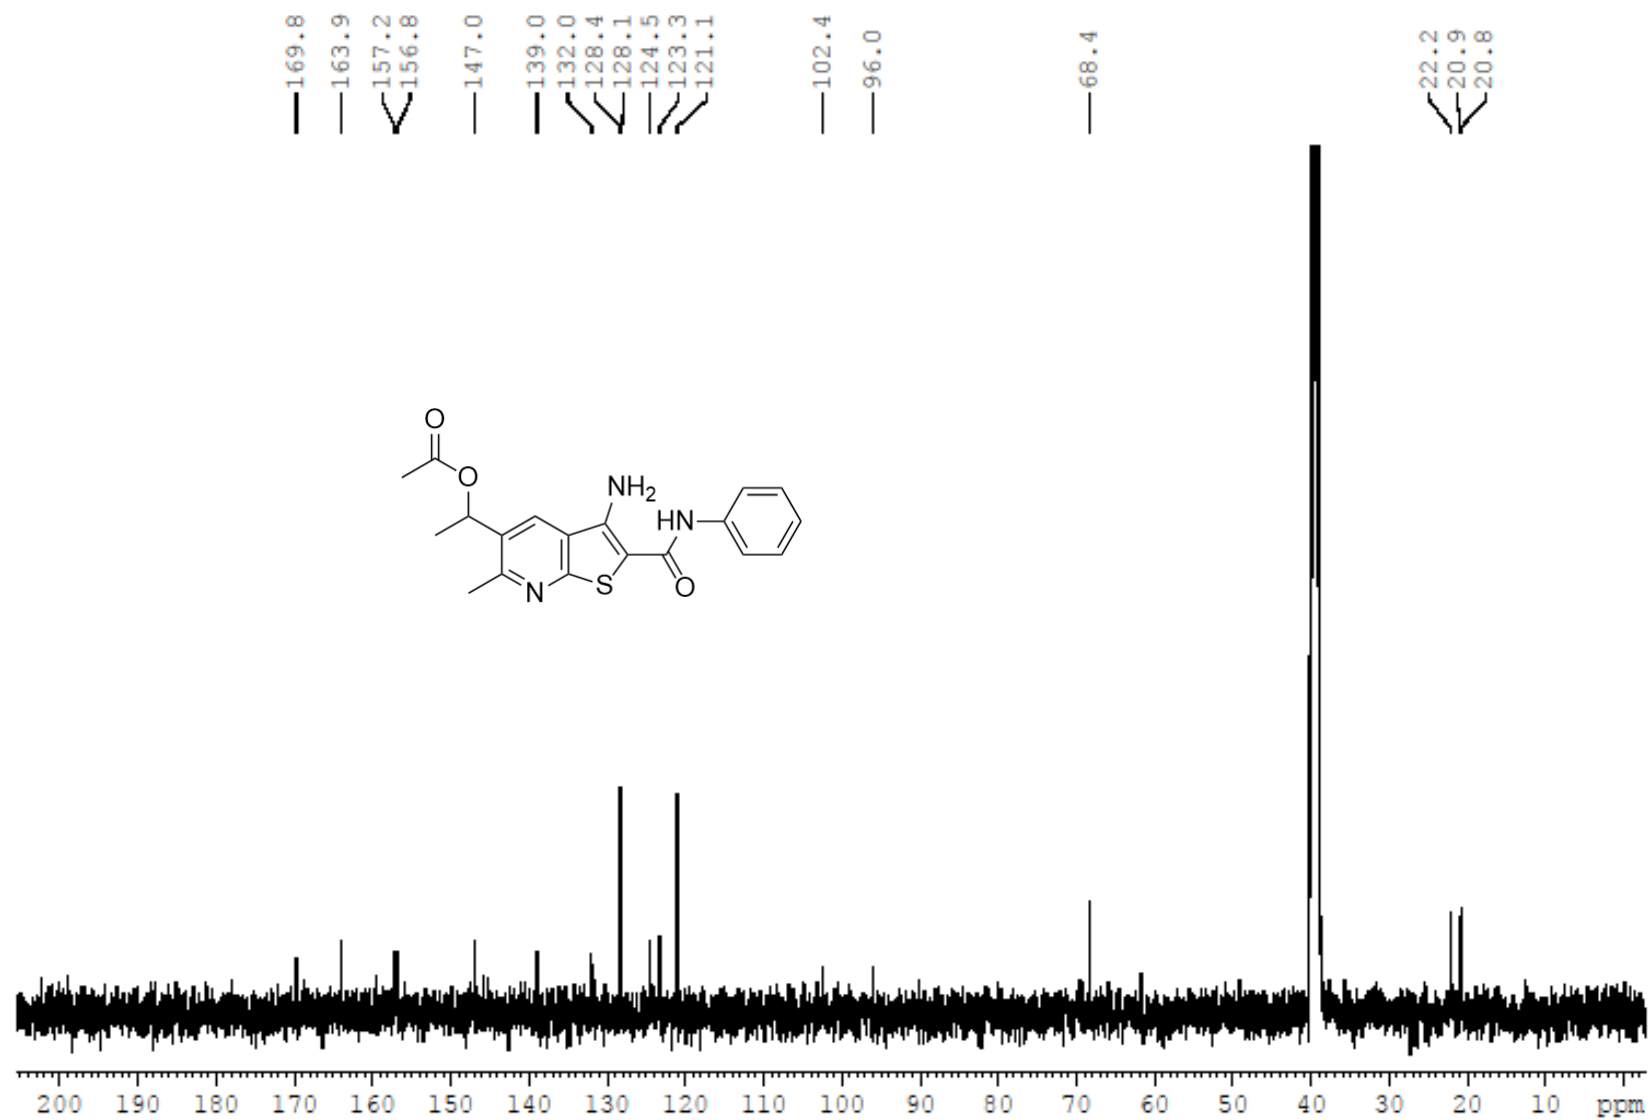

**Figure S2:** <sup>13</sup>C NMR spectrum of **6a** (100 MHz; DMSO-*d*<sub>6</sub>).

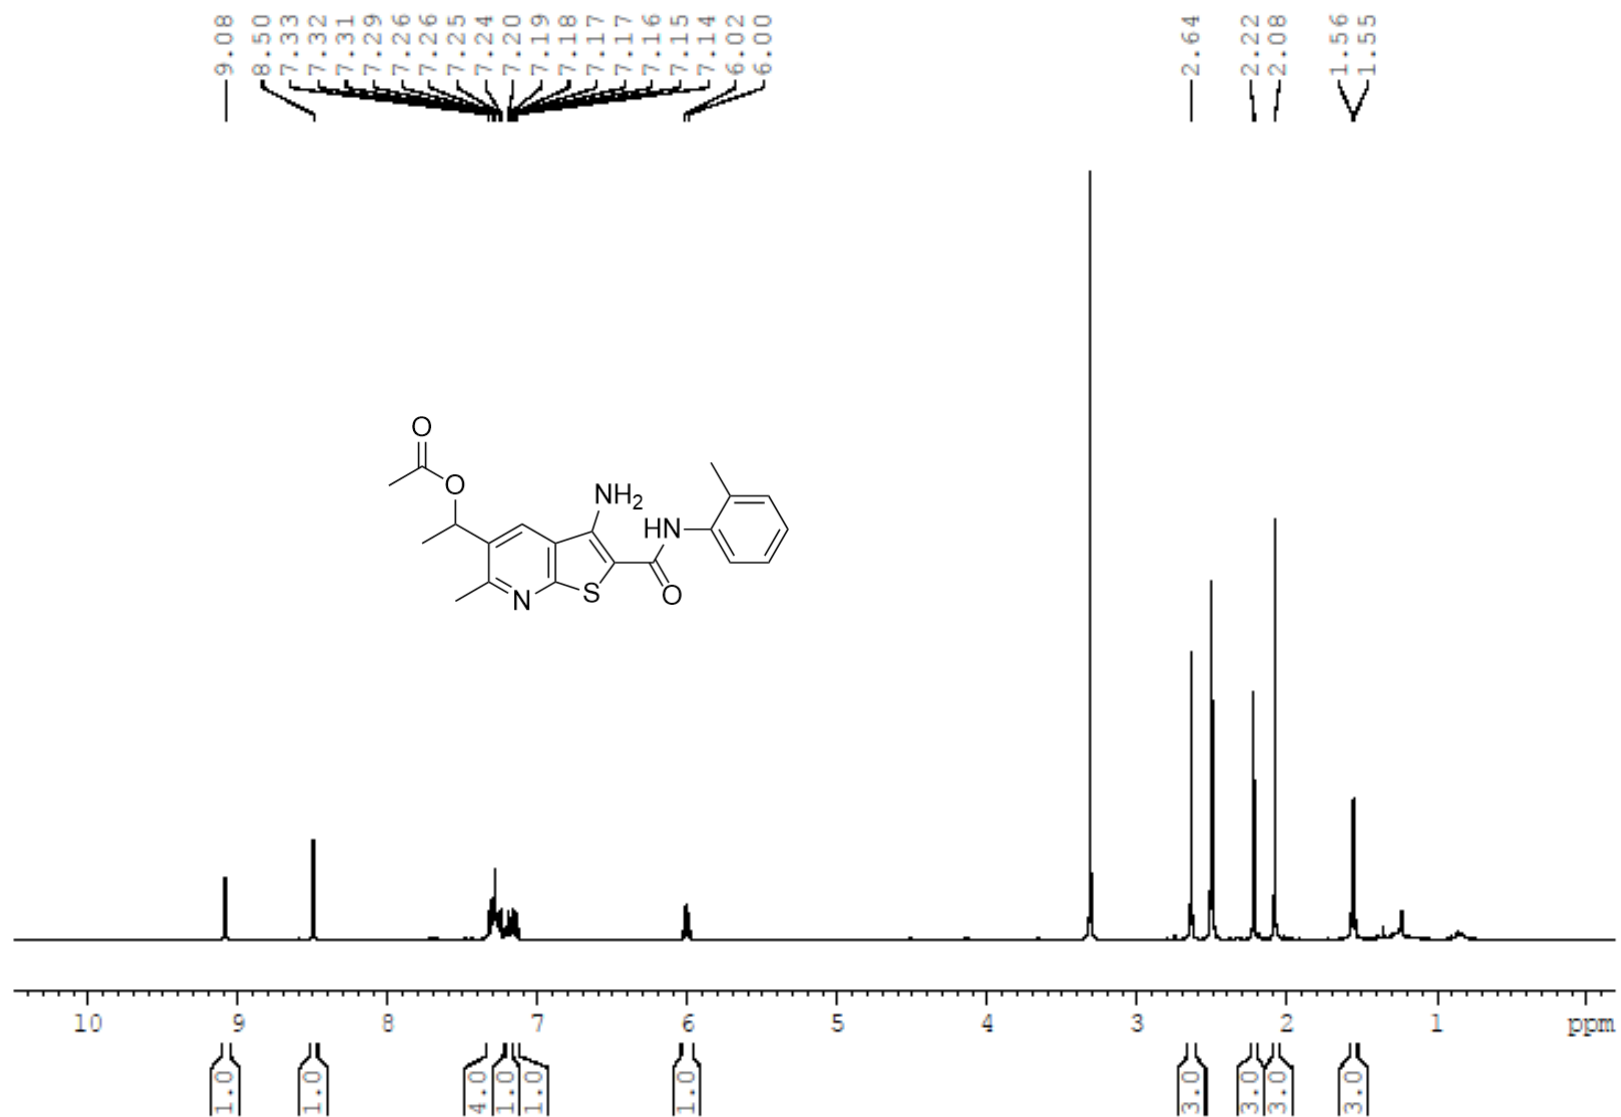

**Figure S3:** <sup>1</sup>H NMR spectrum of **6b** (400 MHz; DMSO-*d*<sub>6</sub>).

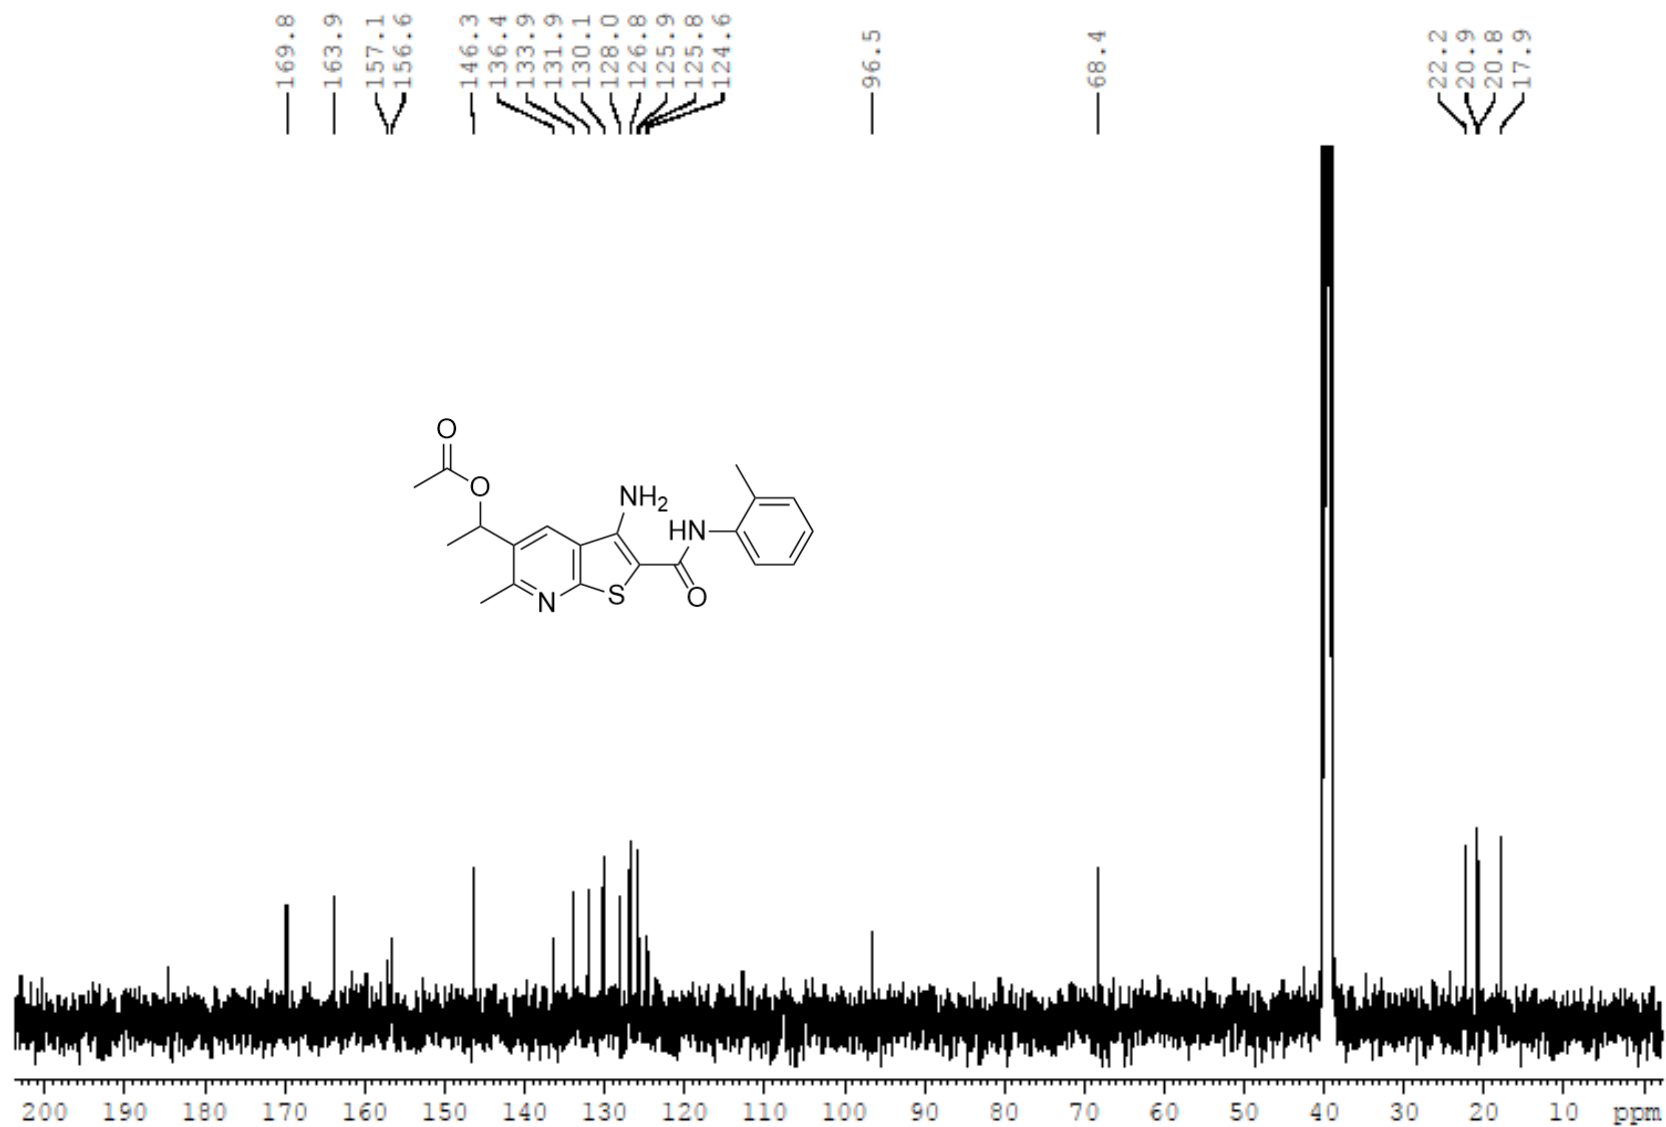

**Figure S4:** <sup>13</sup>C NMR spectrum of **6b** (100 MHz; DMSO-*d*<sub>6</sub>).

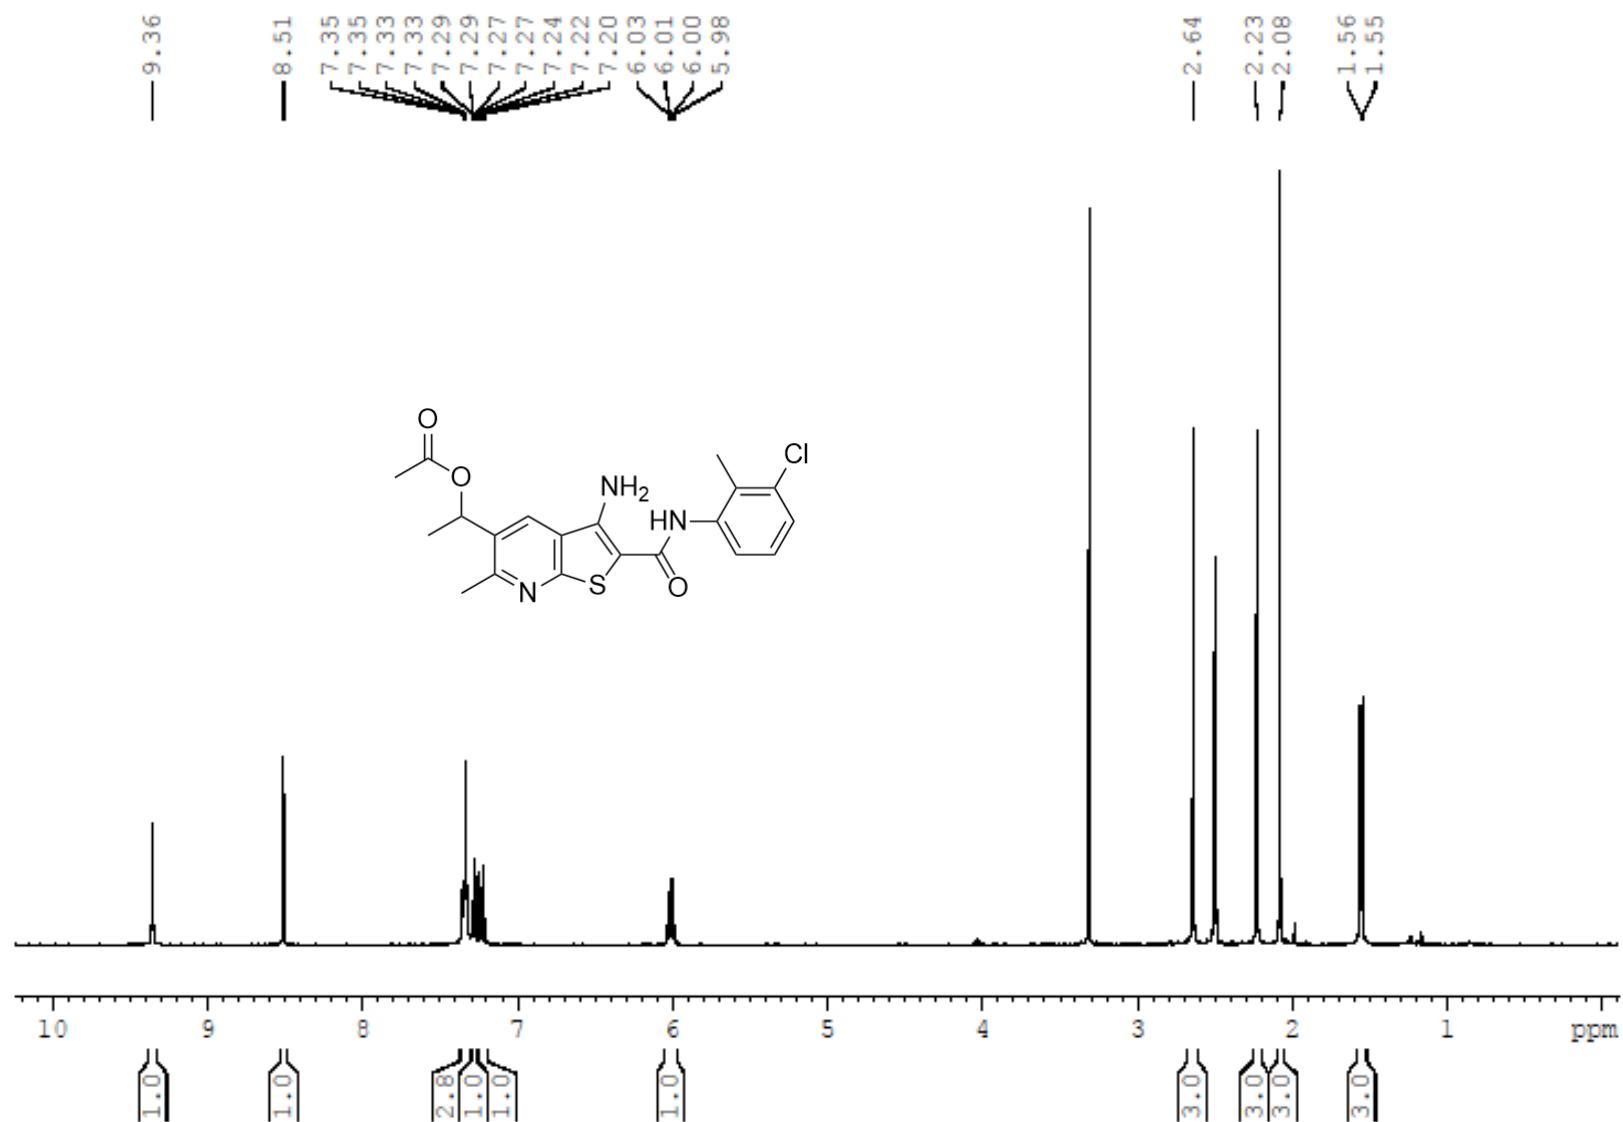

**Figure S5:** <sup>1</sup>H NMR spectrum of **6c** (400 MHz; DMSO-*d*<sub>6</sub>).



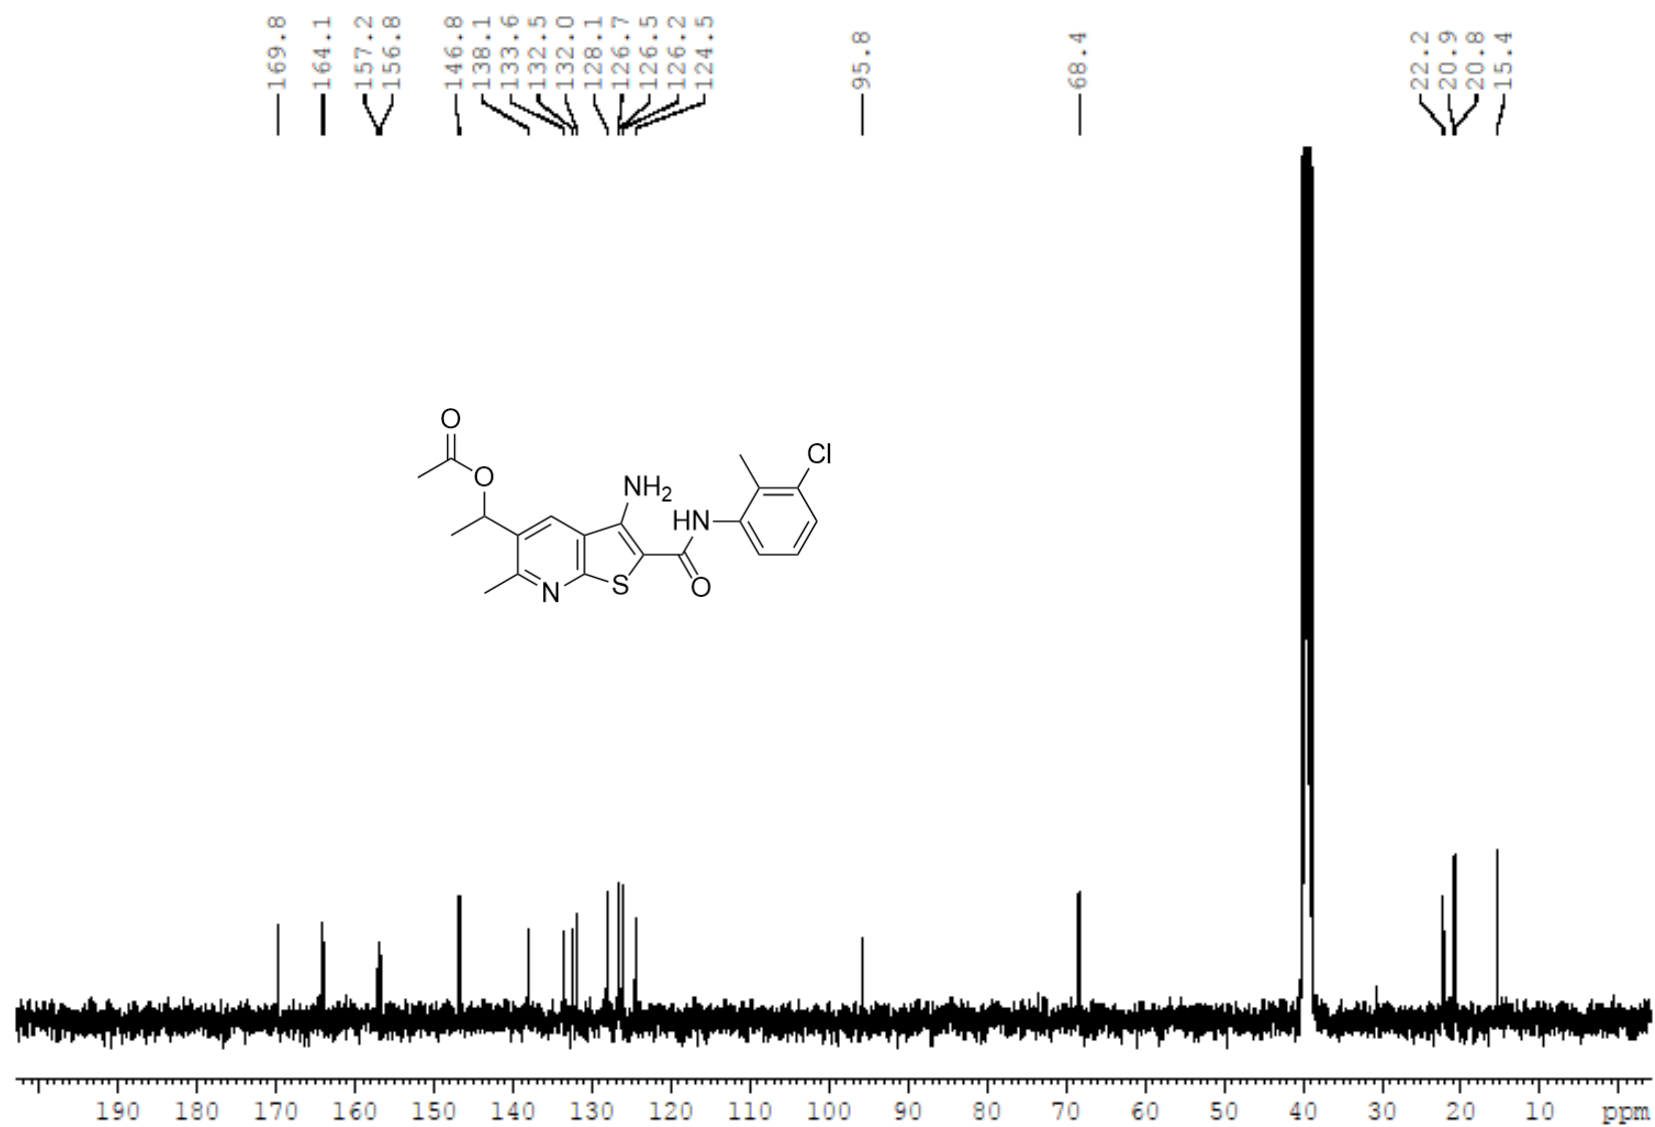

**Figure S6:**  $^{13}\text{C}$  NMR spectrum of **6c** (100 MHz;  $\text{DMSO}-d_6$ ).

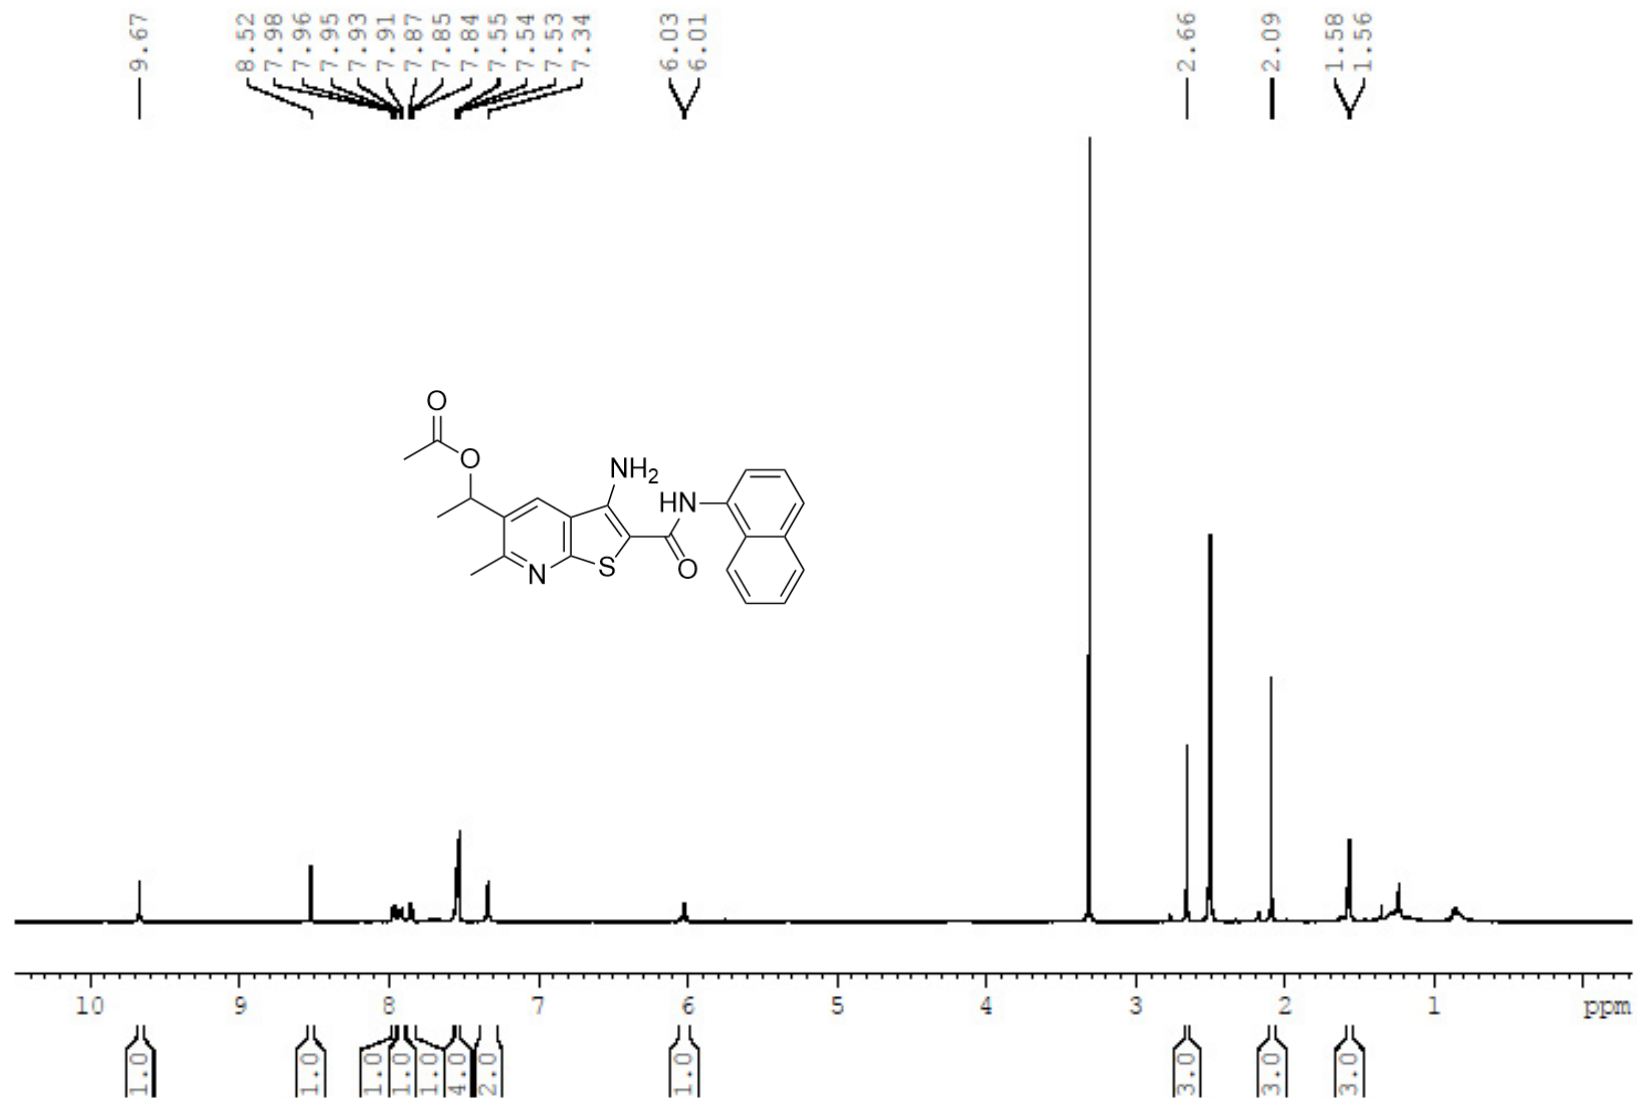

**Figure S7:**  $^1\text{H}$  NMR spectrum of **6d** (400 MHz;  $\text{DMSO}-d_6$ ).

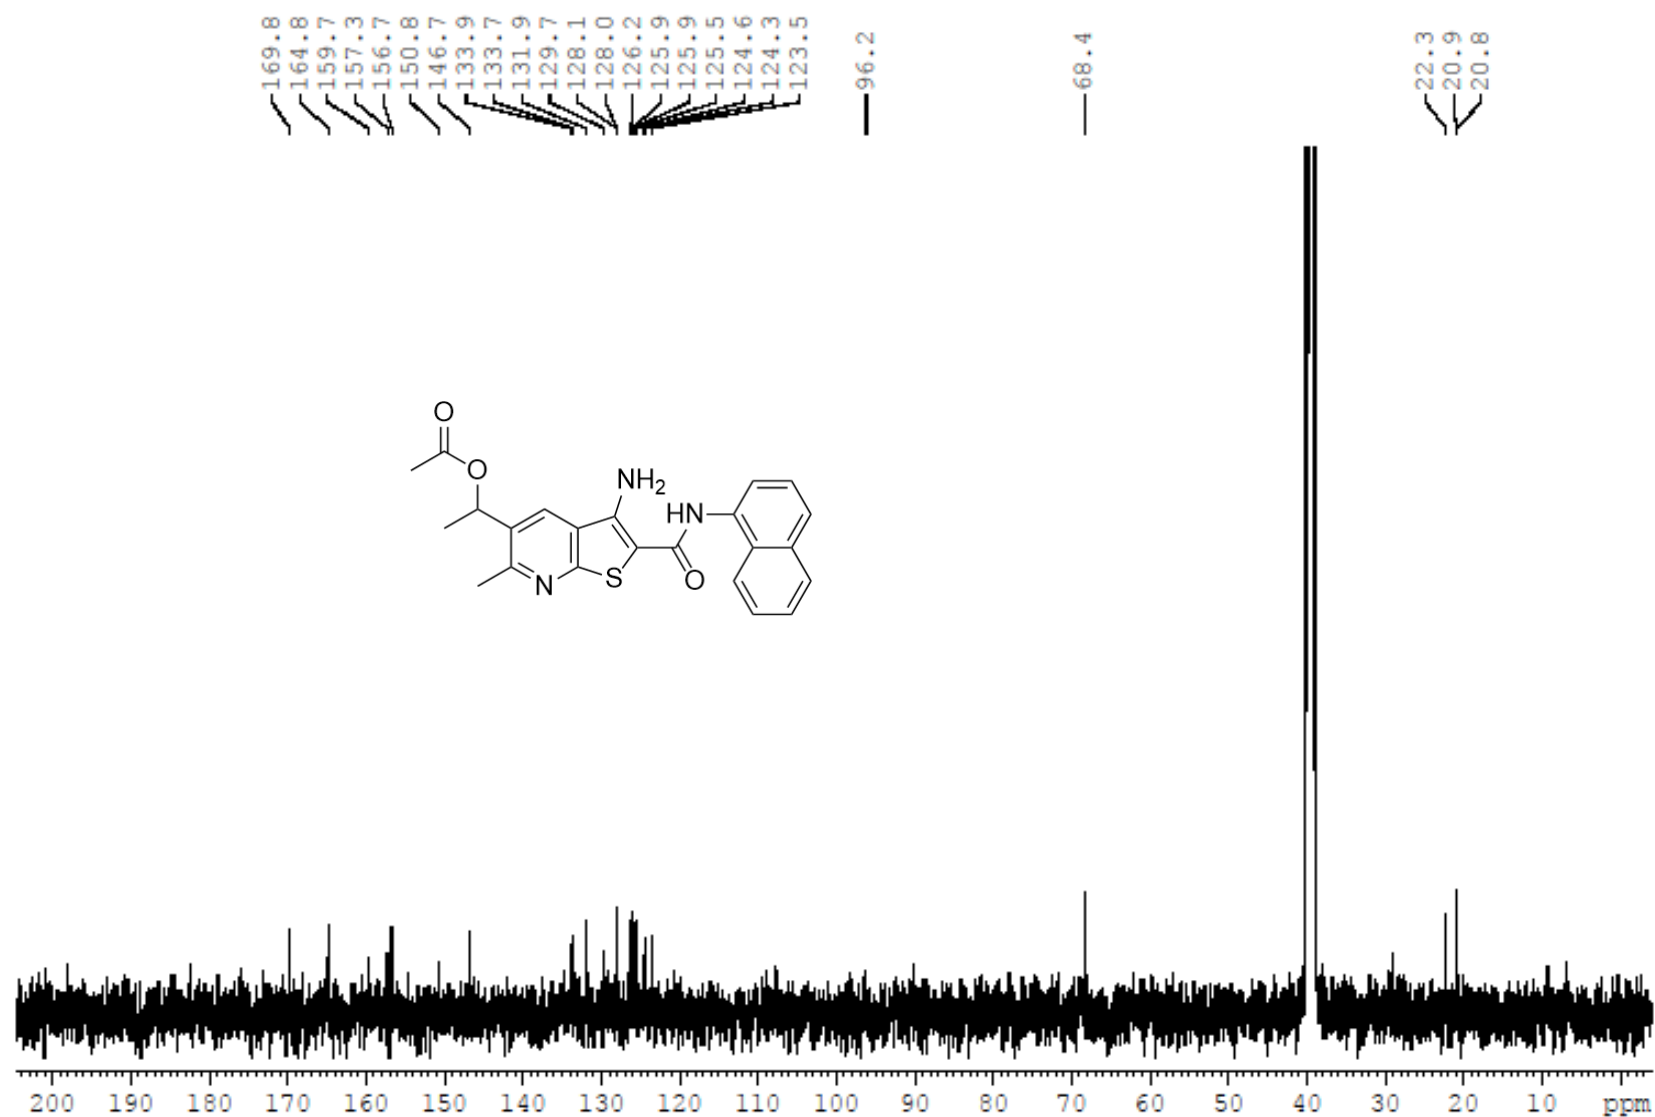

**Figure S8:** <sup>13</sup>C NMR spectrum of **6d** (100 MHz; DMSO-*d*<sub>6</sub>).

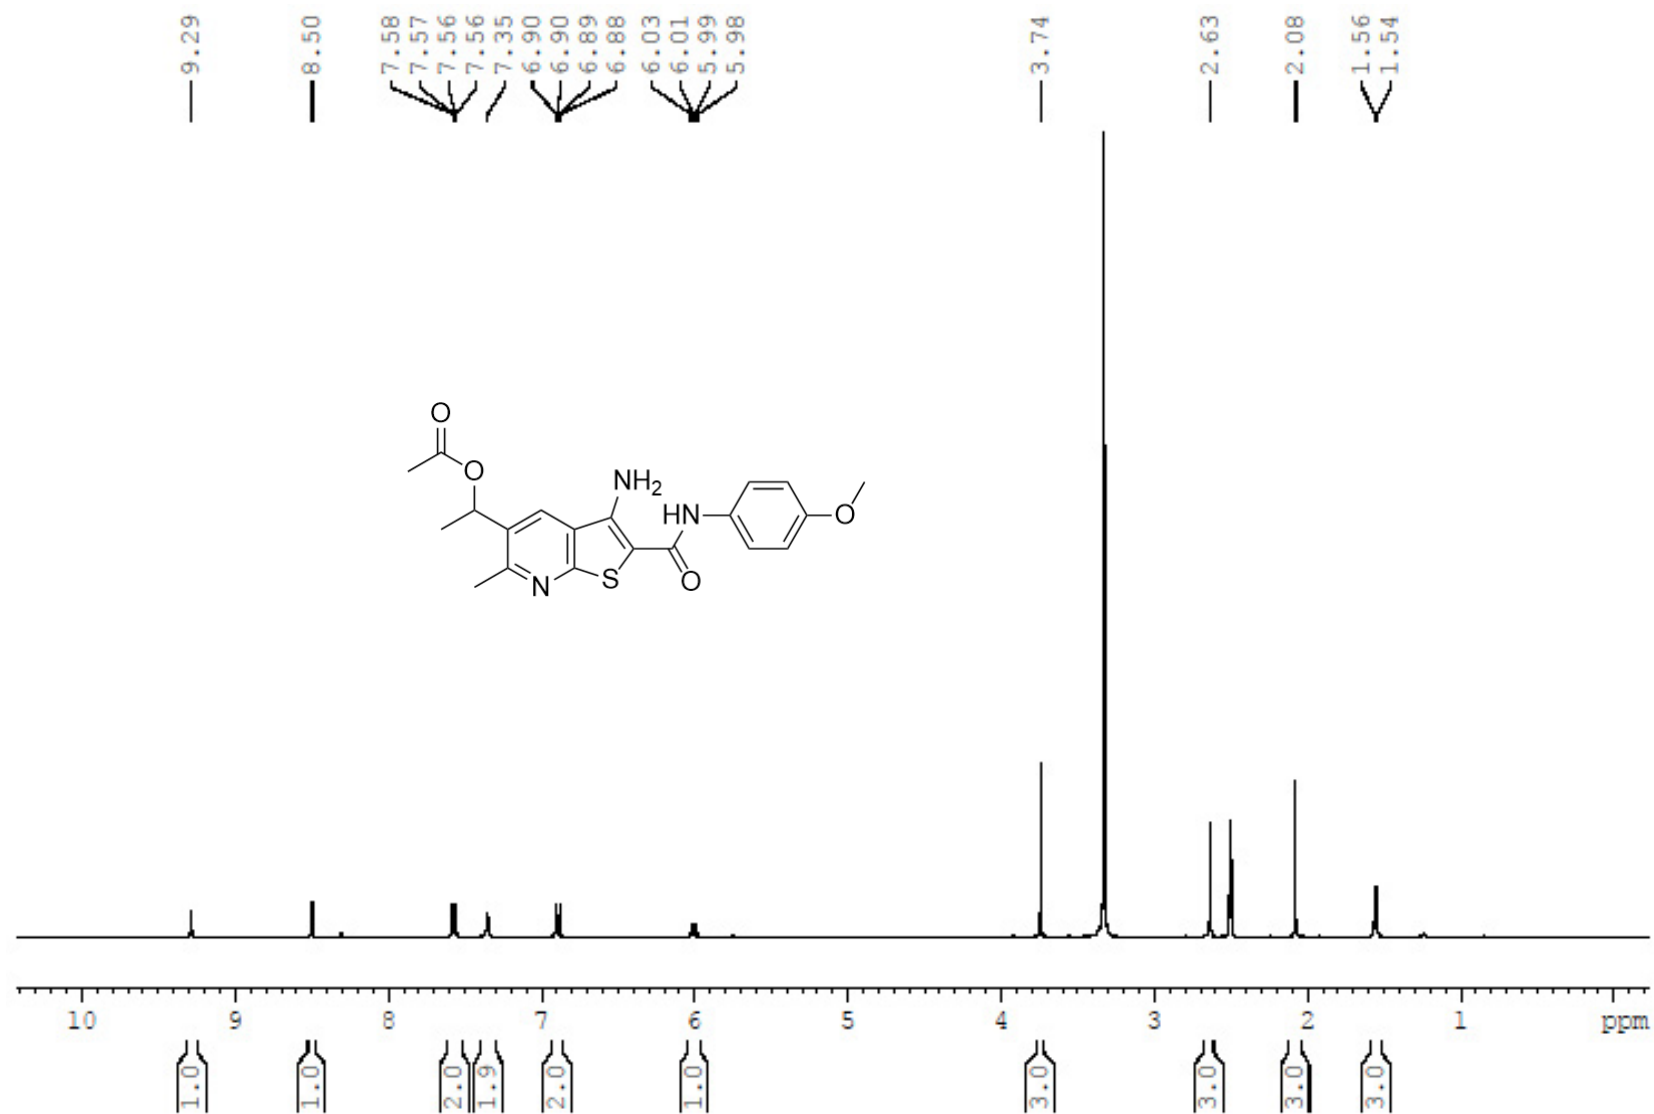

**Figure S9:** <sup>1</sup>H NMR spectrum of **6e** (400 MHz; DMSO-*d*<sub>6</sub>).

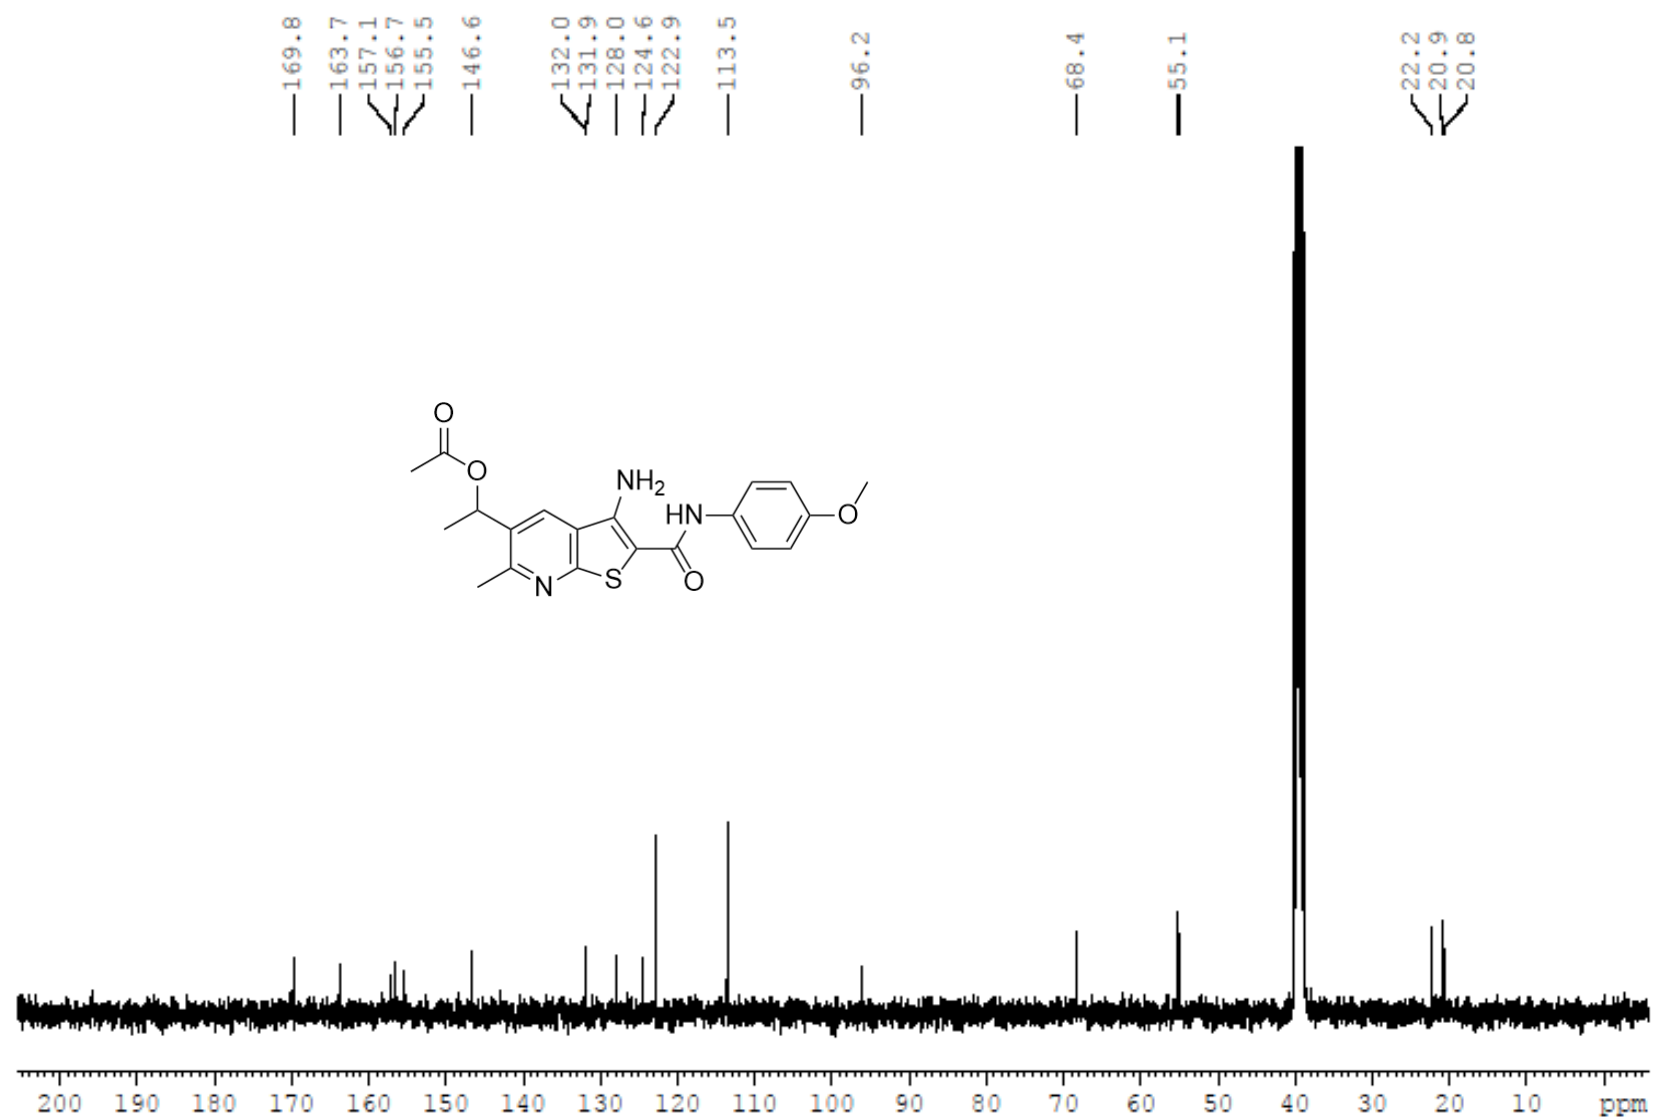

**Figure S10:**  $^{13}\text{C}$  NMR spectrum of **6e** (100 MHz;  $\text{DMSO}-d_6$ ).

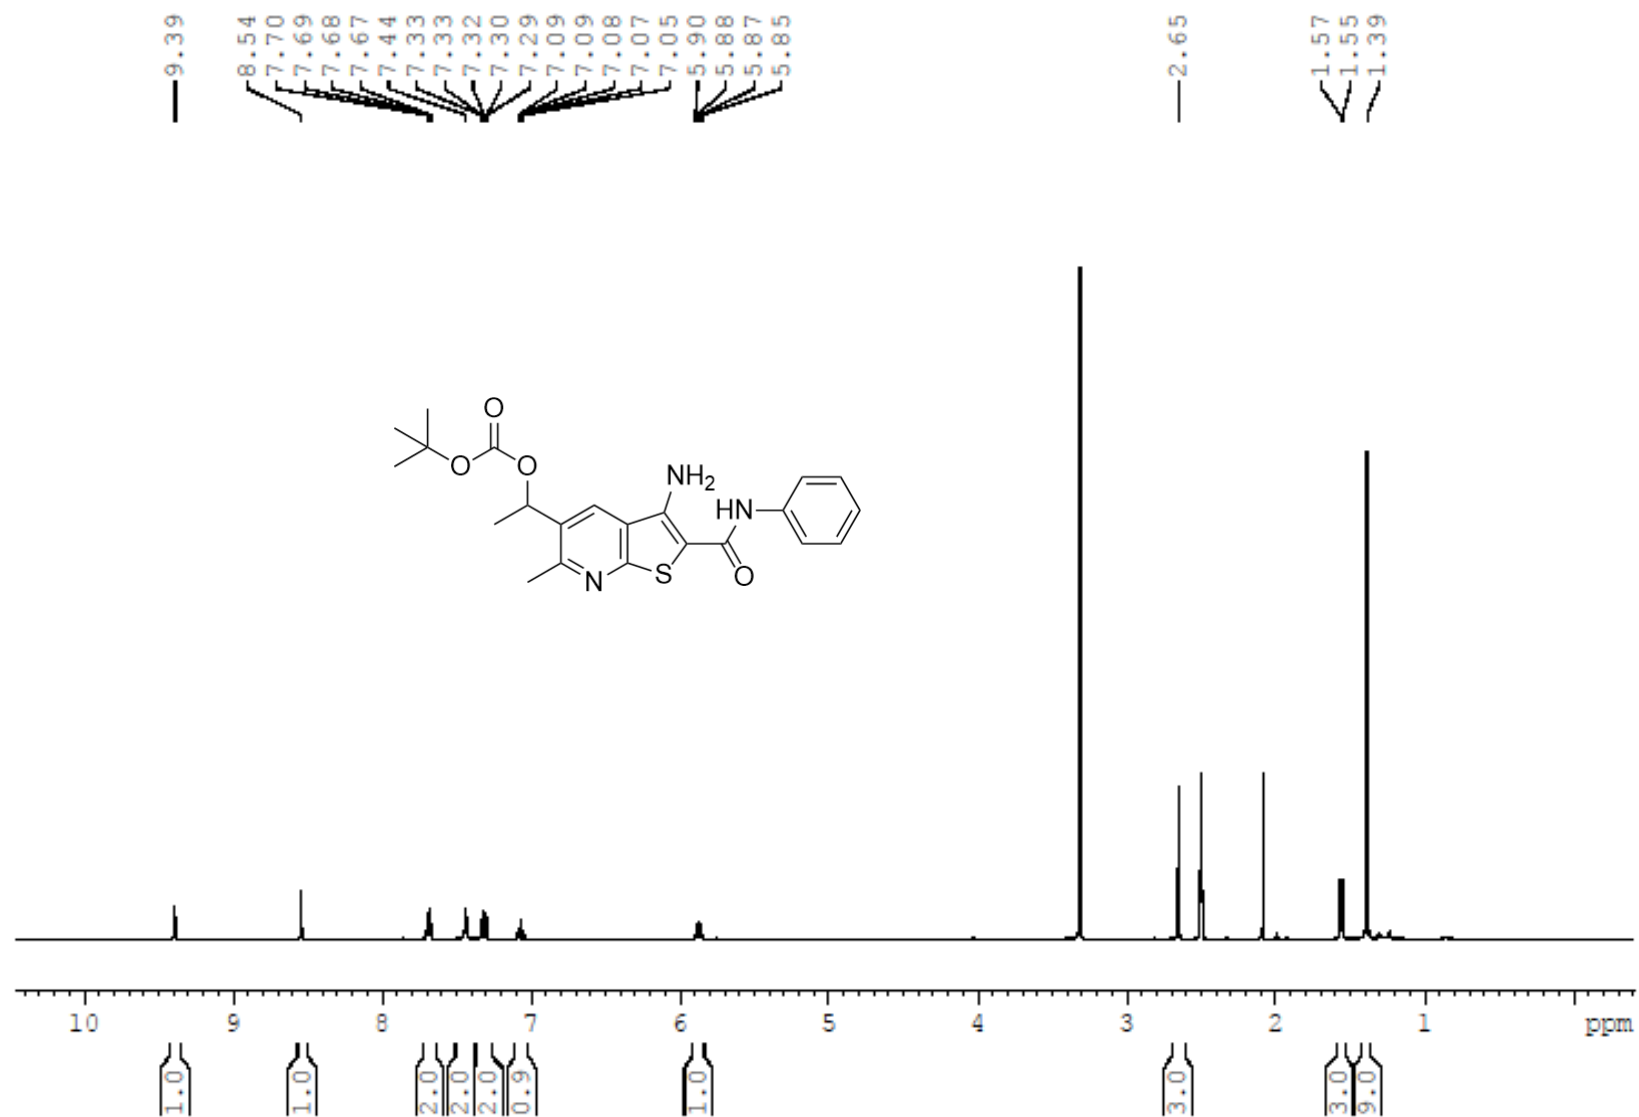

**Figure S11:** <sup>1</sup>H NMR spectrum of **7a** (400 MHz; DMSO-*d*<sub>6</sub>).

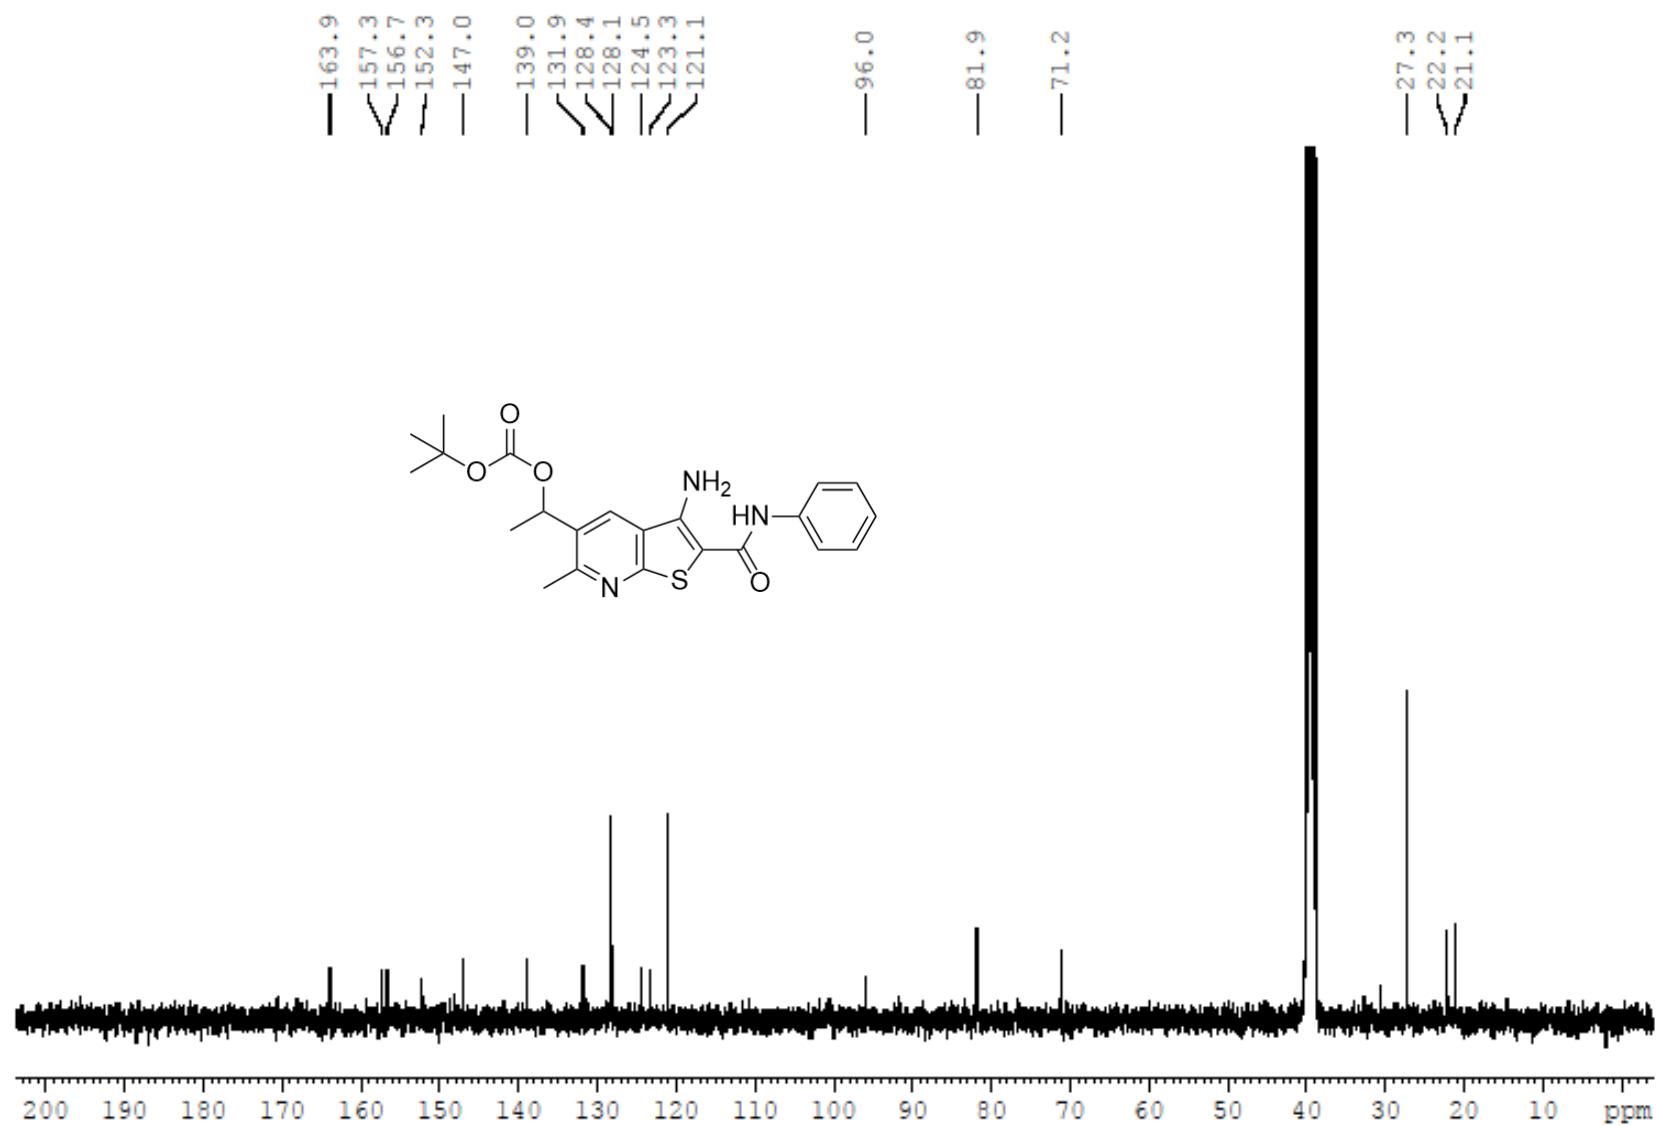

**Figure S12:**  $^{13}\text{C}$  NMR spectrum of **7a** (100 MHz;  $\text{DMSO}-d_6$ ).

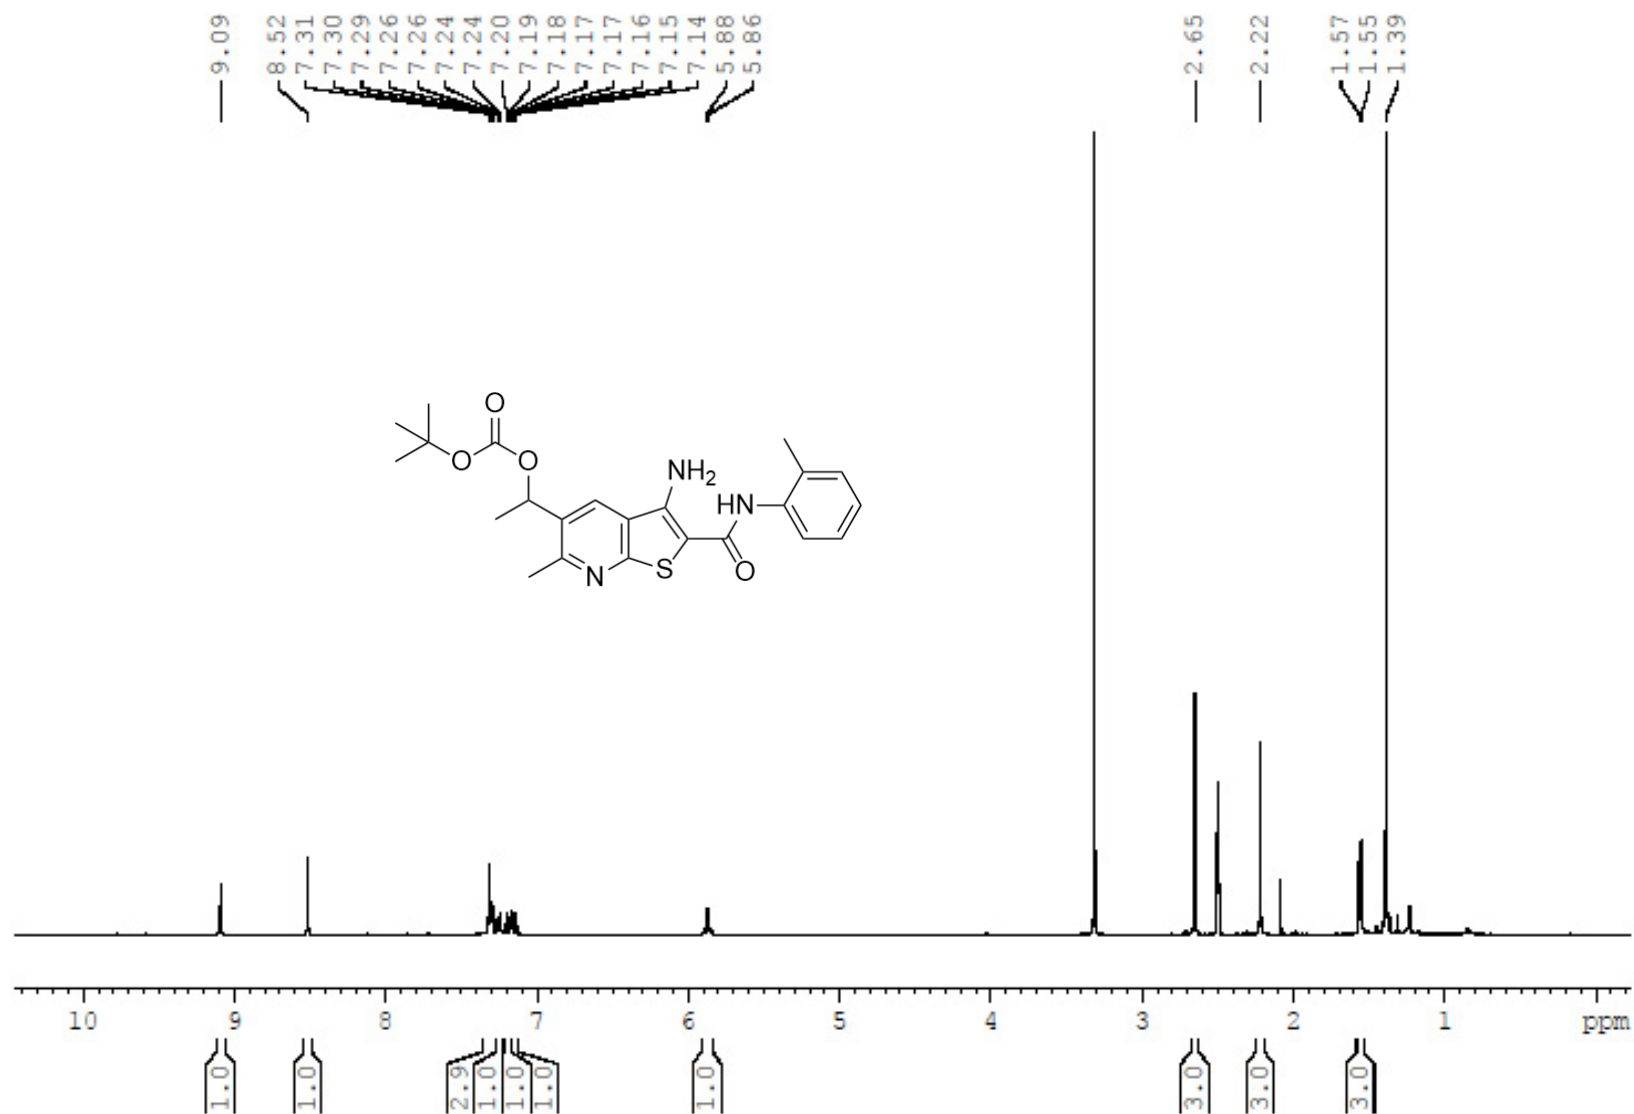

**Figure S13:**  $^1\text{H}$  NMR spectrum of **7b** (400 MHz;  $\text{DMSO-}d_6$ ).



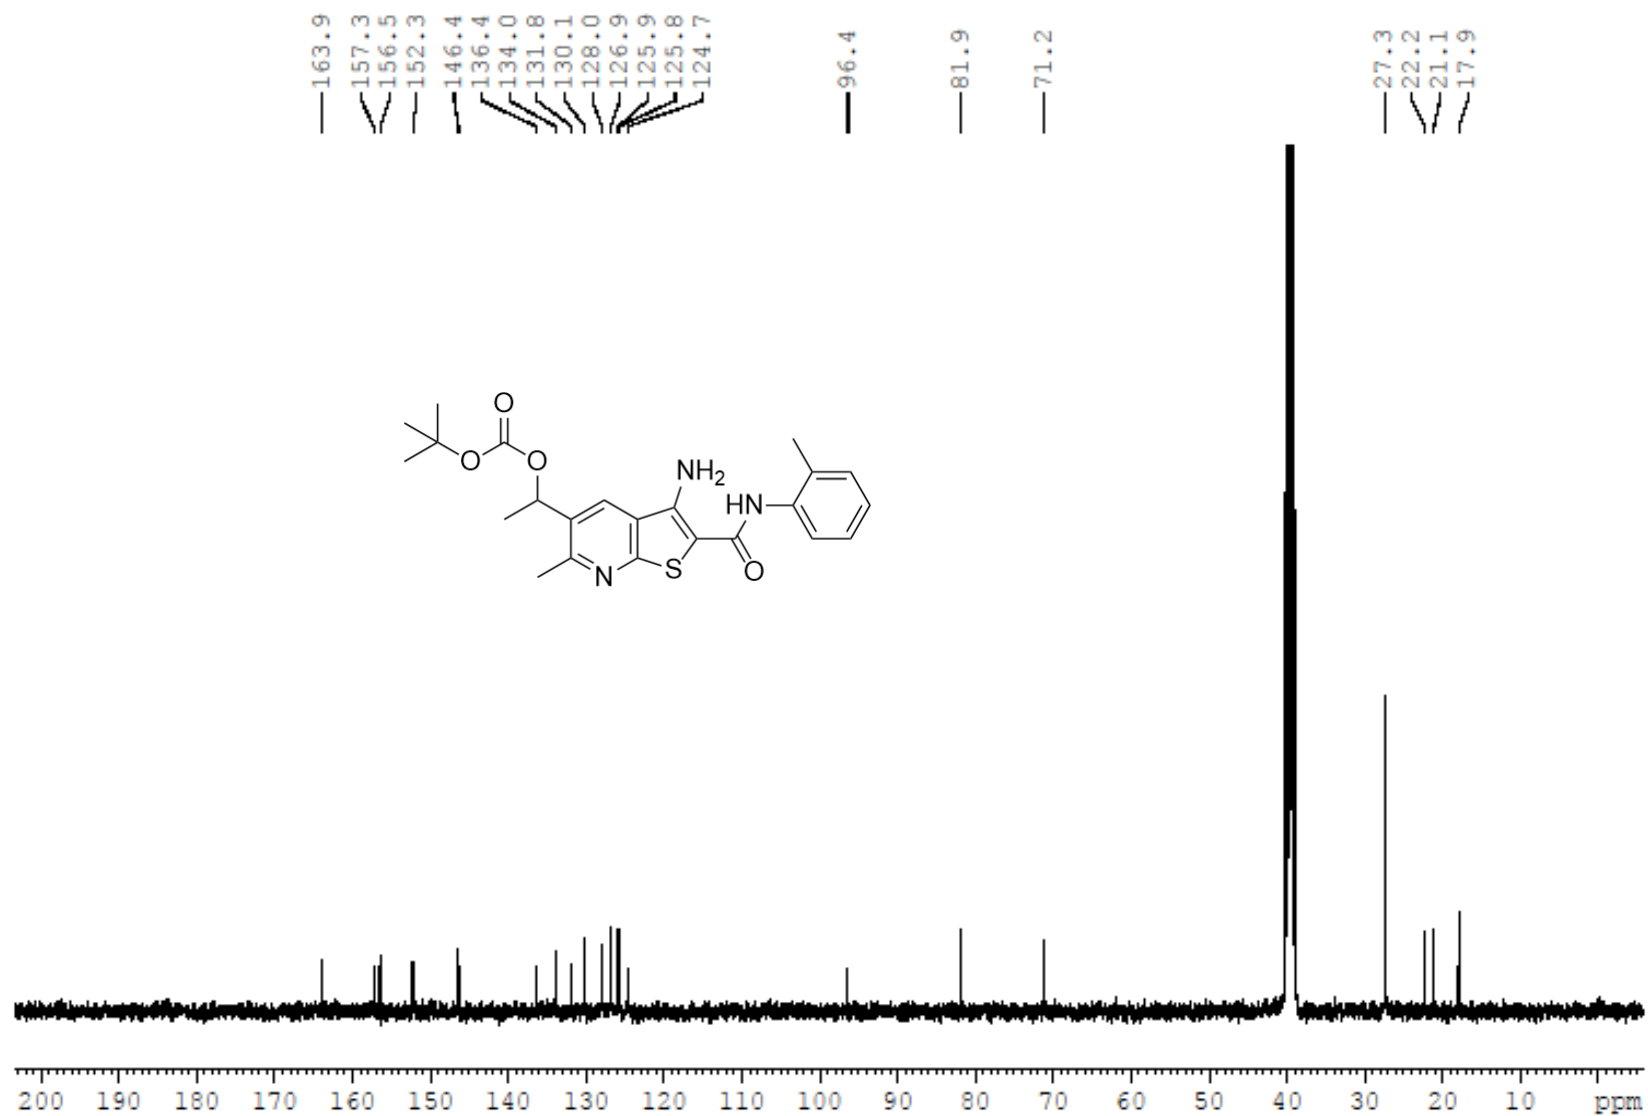

**Figure S14:** <sup>13</sup>C NMR spectrum of **7b** (100 MHz; DMSO-*d*<sub>6</sub>).

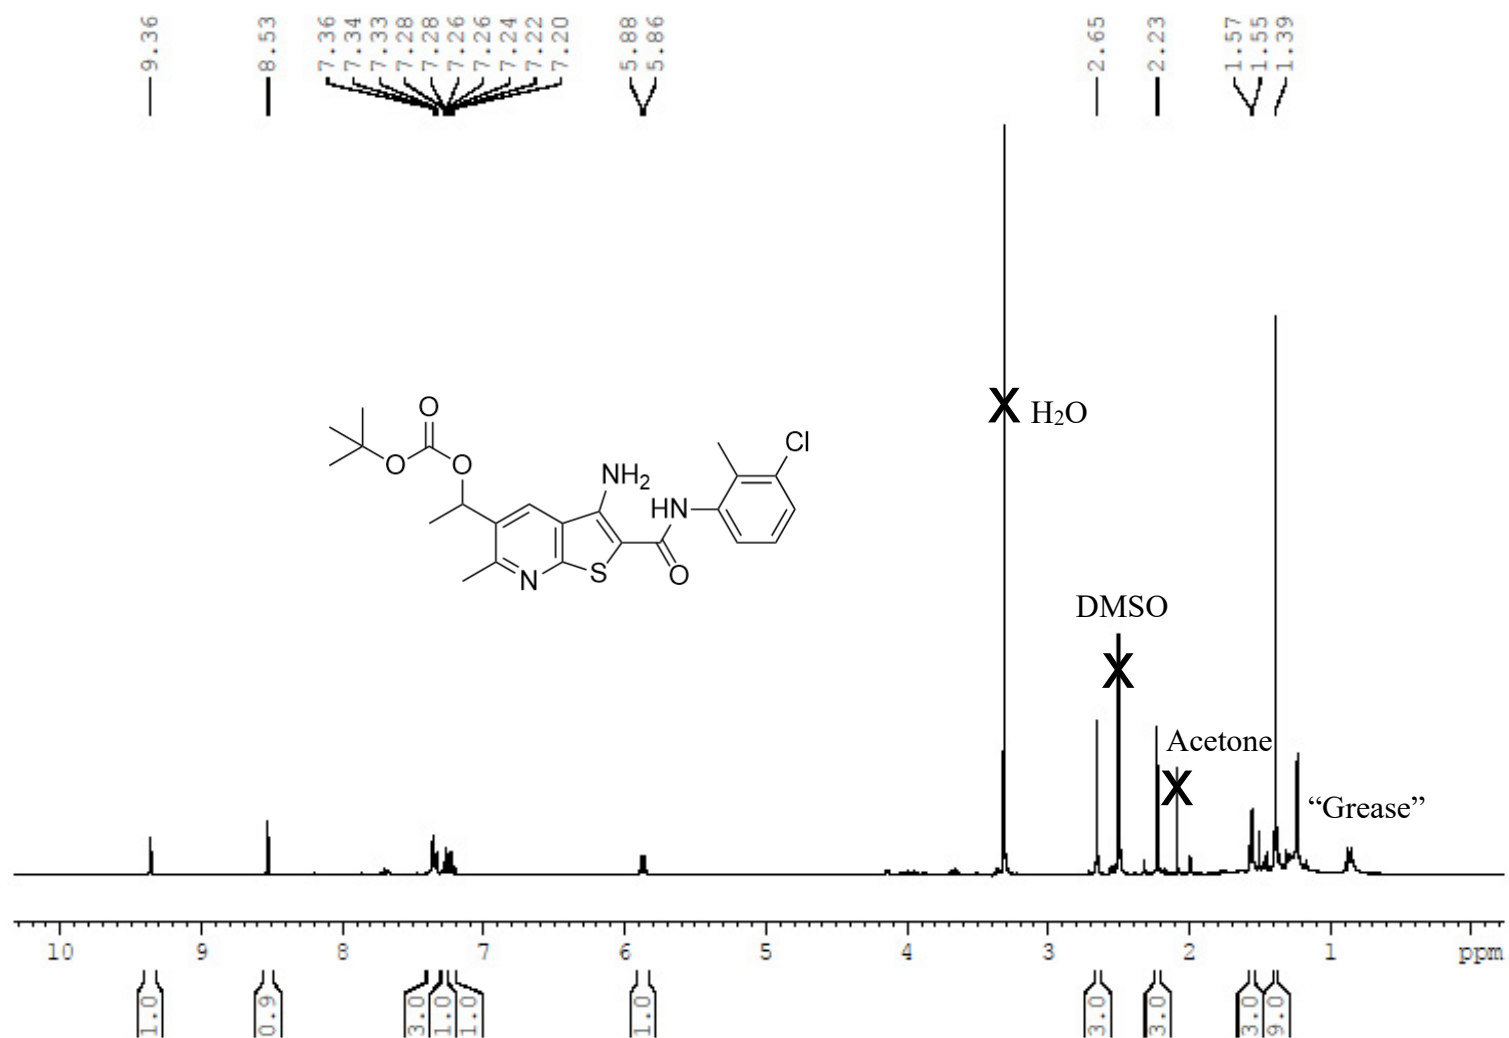

**Figure S15:**  $^1\text{H}$  NMR spectrum of **7c** (400 MHz;  $\text{DMSO-}d_6$ ).

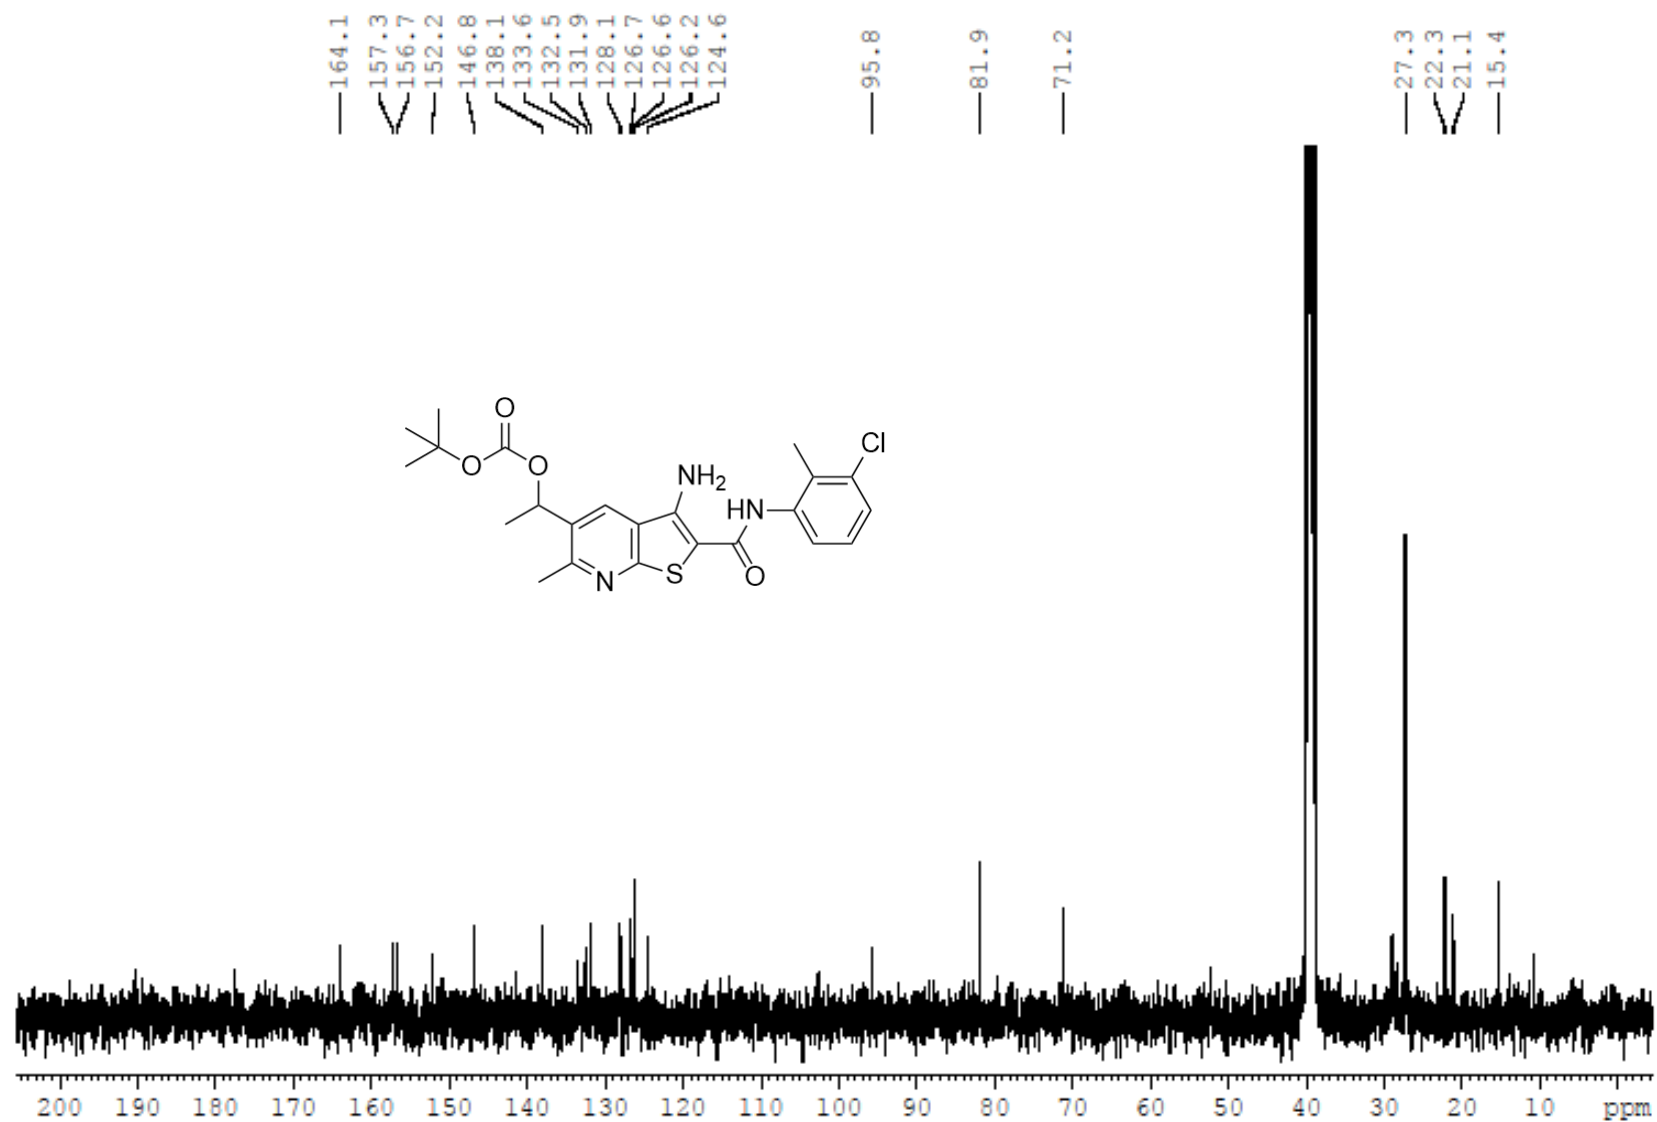

**Figure S16:** <sup>13</sup>C NMR spectrum of **7c** (100 MHz; DMSO-*d*<sub>6</sub>).

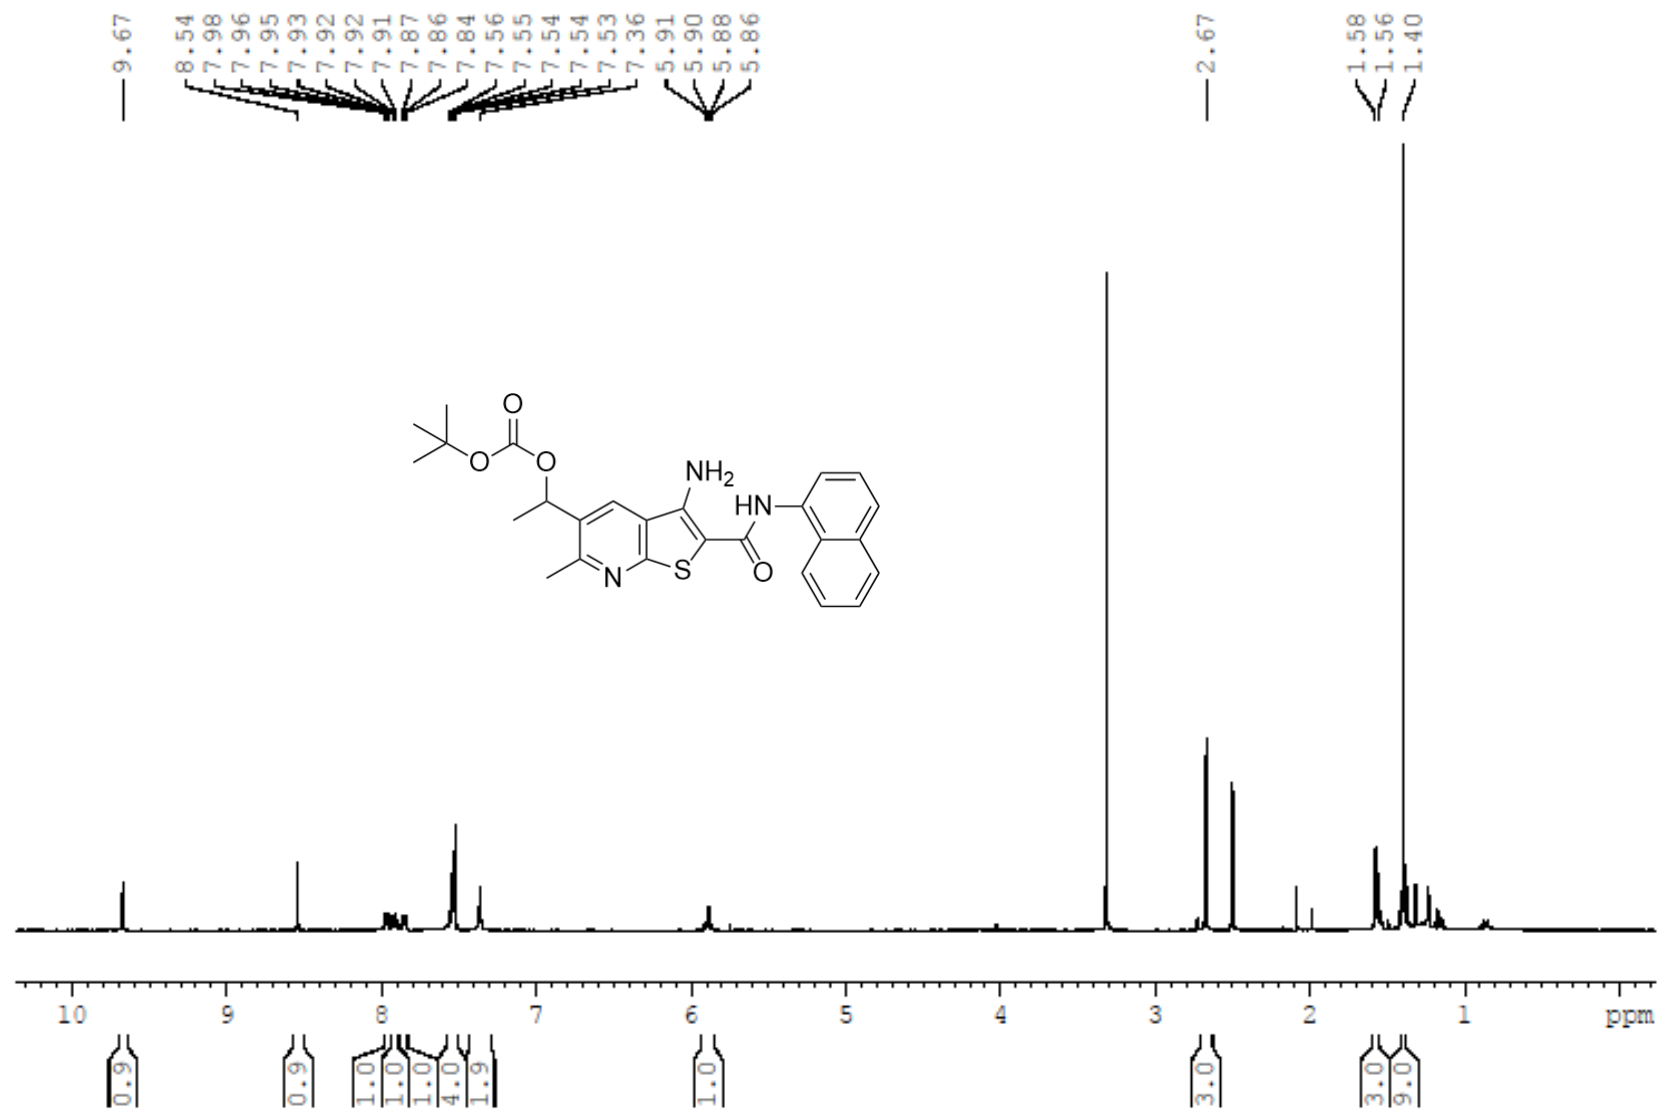

**Figure S17:** <sup>1</sup>H NMR spectrum of **7d** (400 MHz; DMSO-*d*<sub>6</sub>).

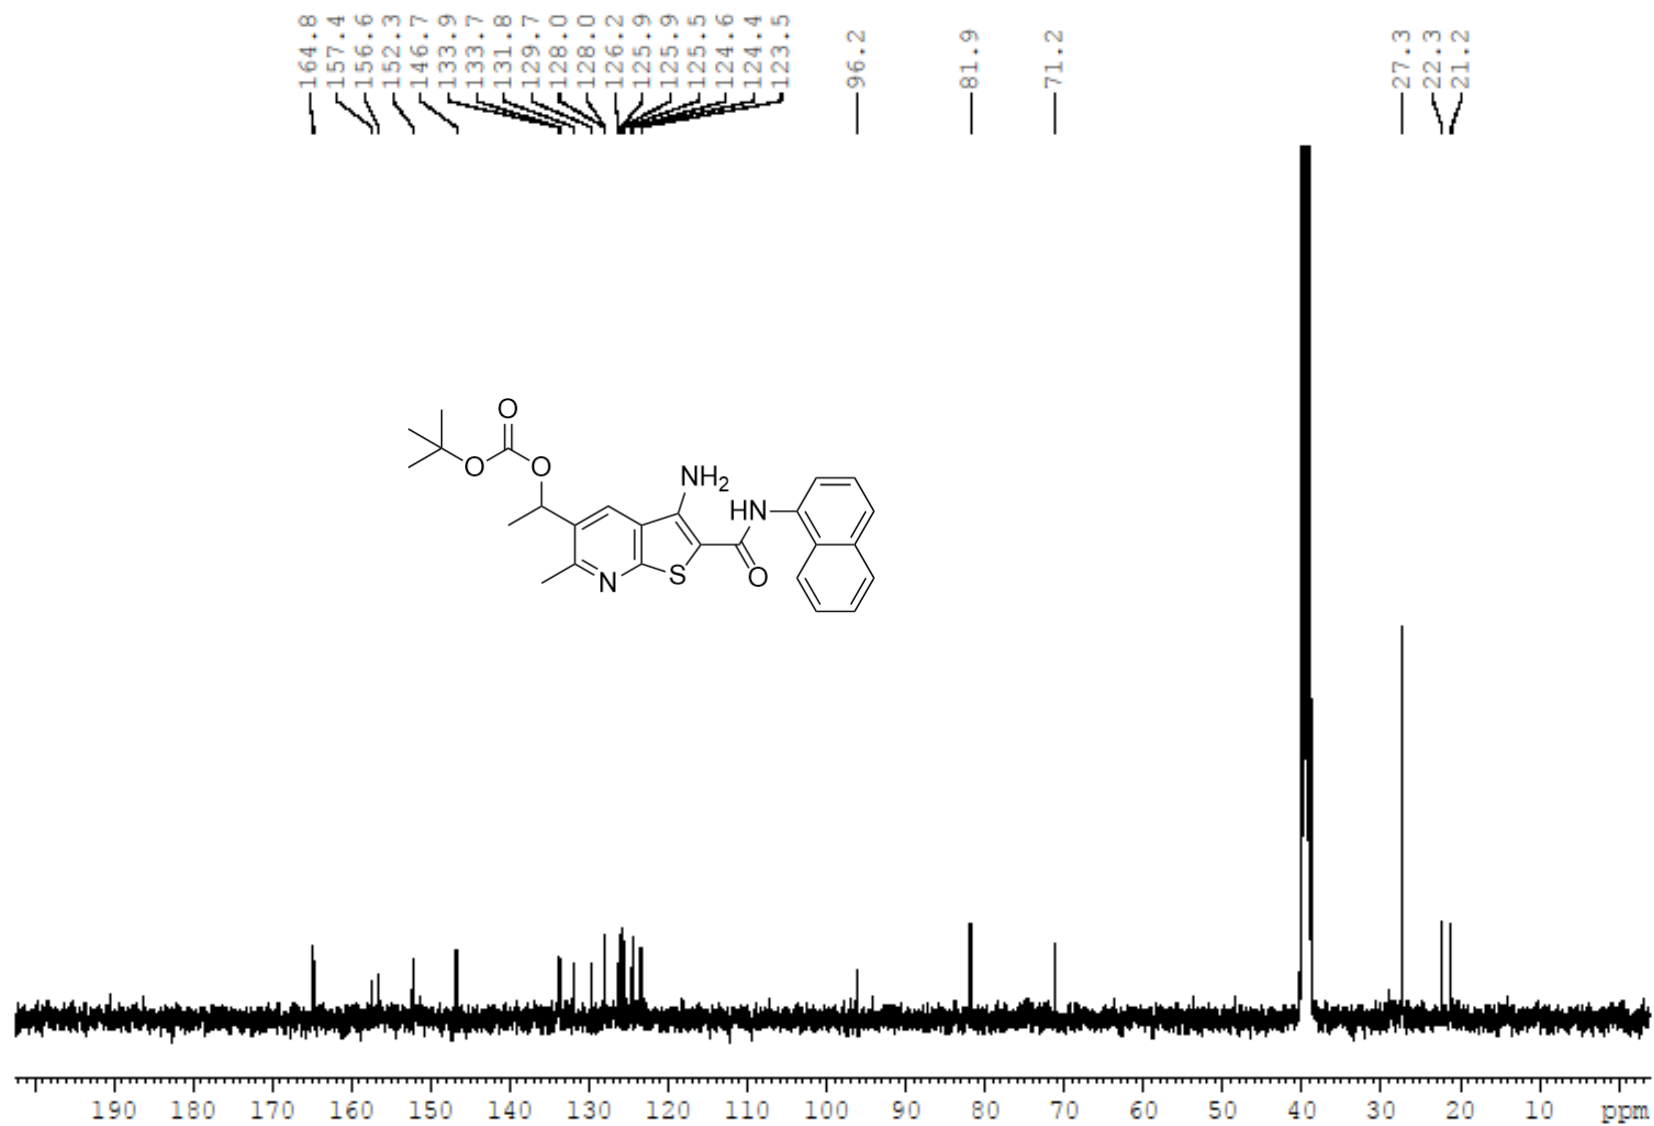

**Figure S18:** <sup>13</sup>C NMR spectrum of **7d** (100 MHz; DMSO-*d*<sub>6</sub>).

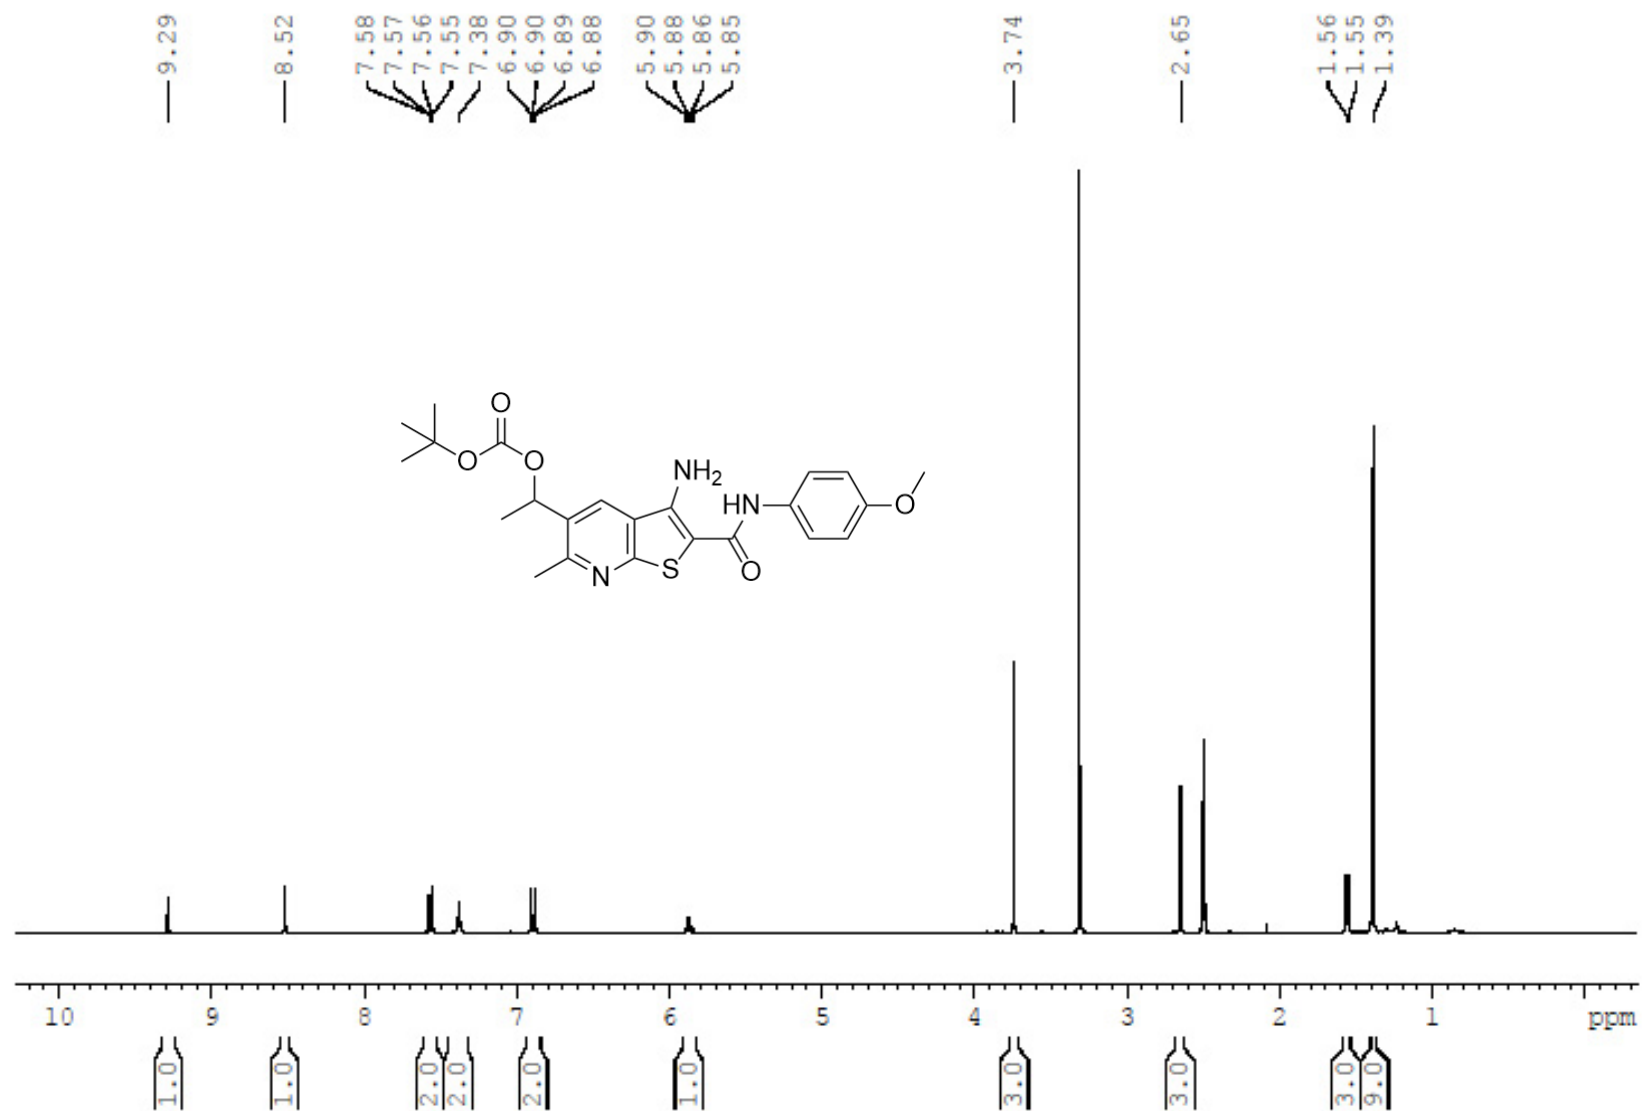

**Figure S19:** <sup>1</sup>H NMR spectrum of **7e** (400 MHz; DMSO-*d*<sub>6</sub>).

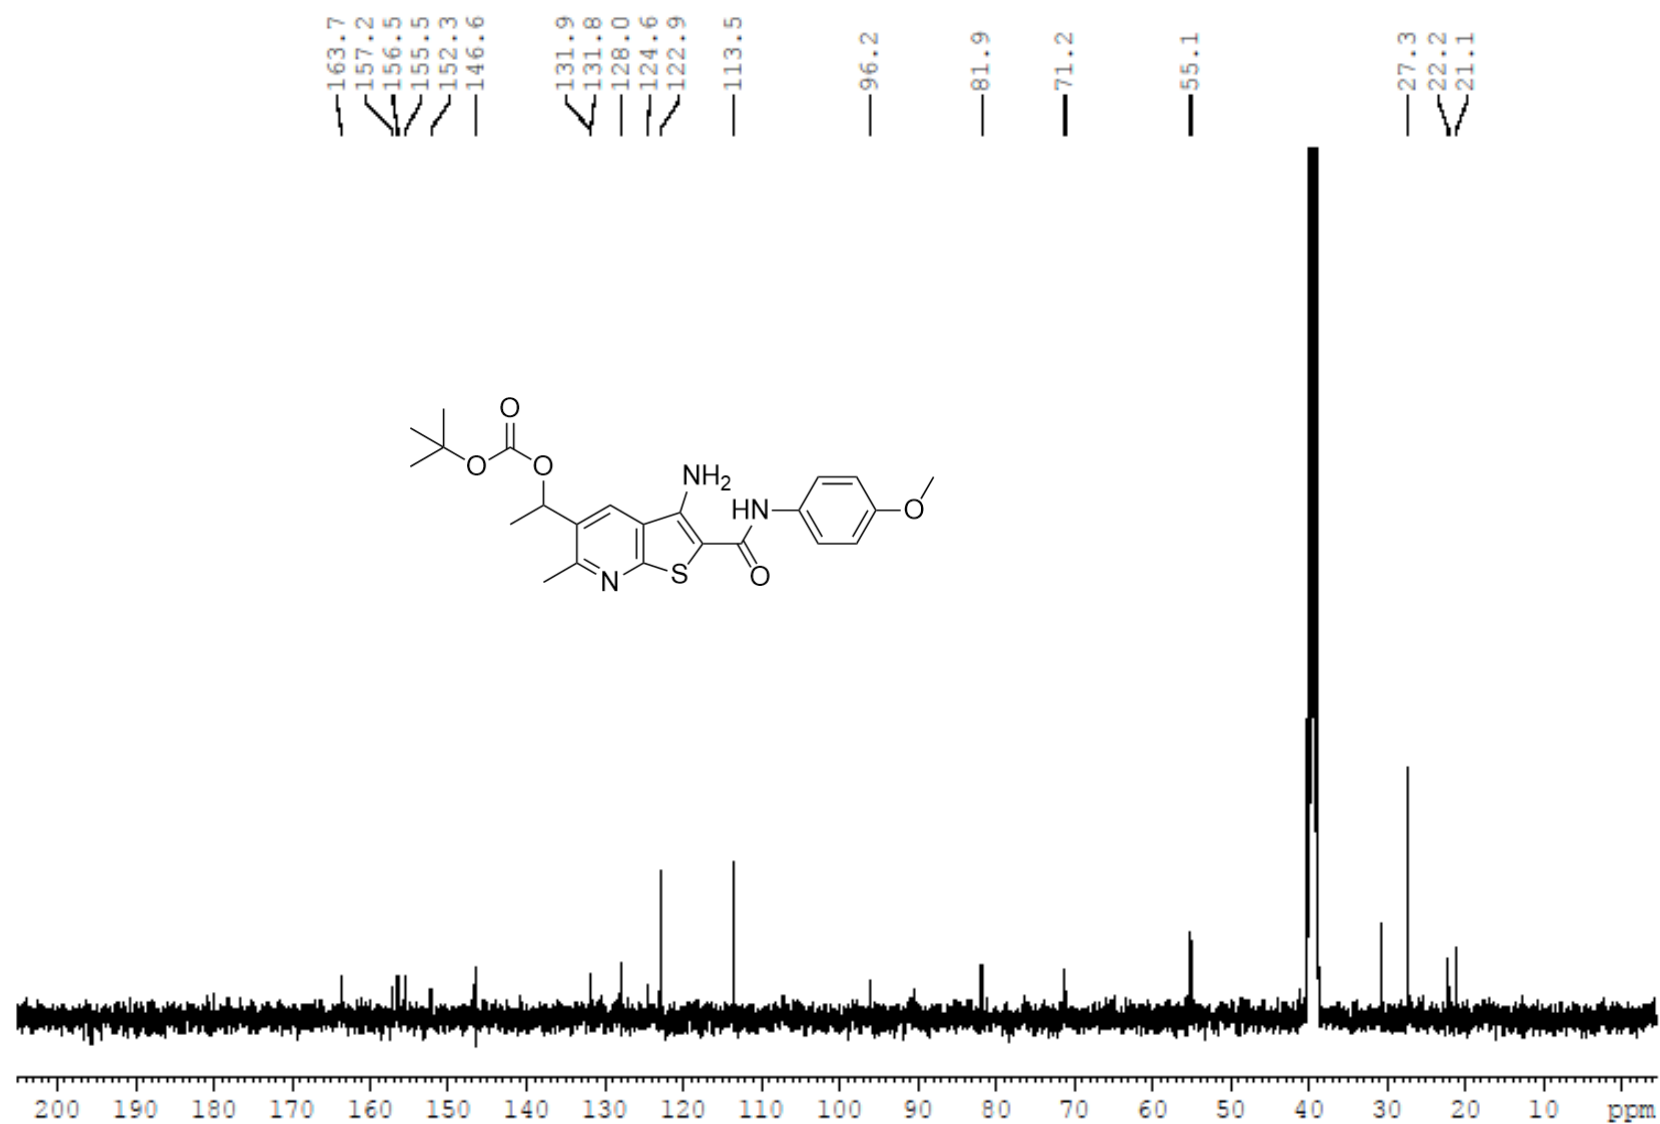

**Figure S20:**  $^{13}\text{C}$  NMR spectrum of **7e** (100 MHz;  $\text{DMSO}-d_6$ ).

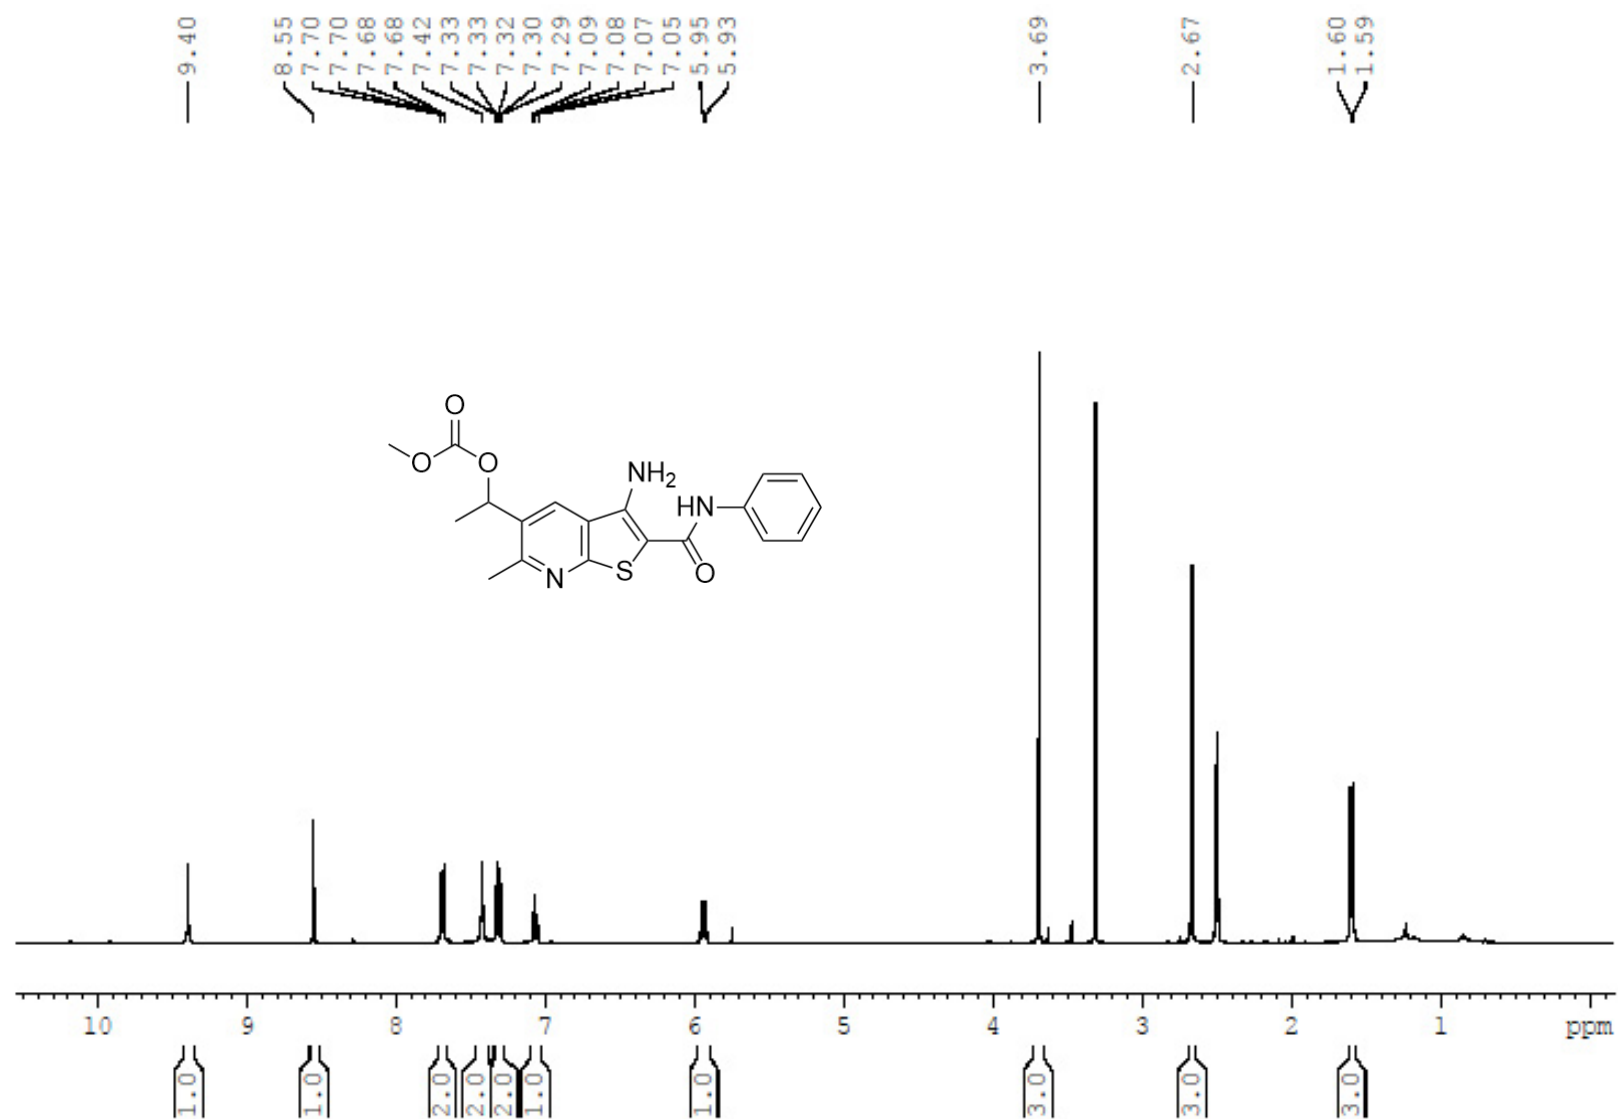

**Figure S21:** <sup>1</sup>H NMR spectrum of **8a** (400 MHz; DMSO-*d*<sub>6</sub>).



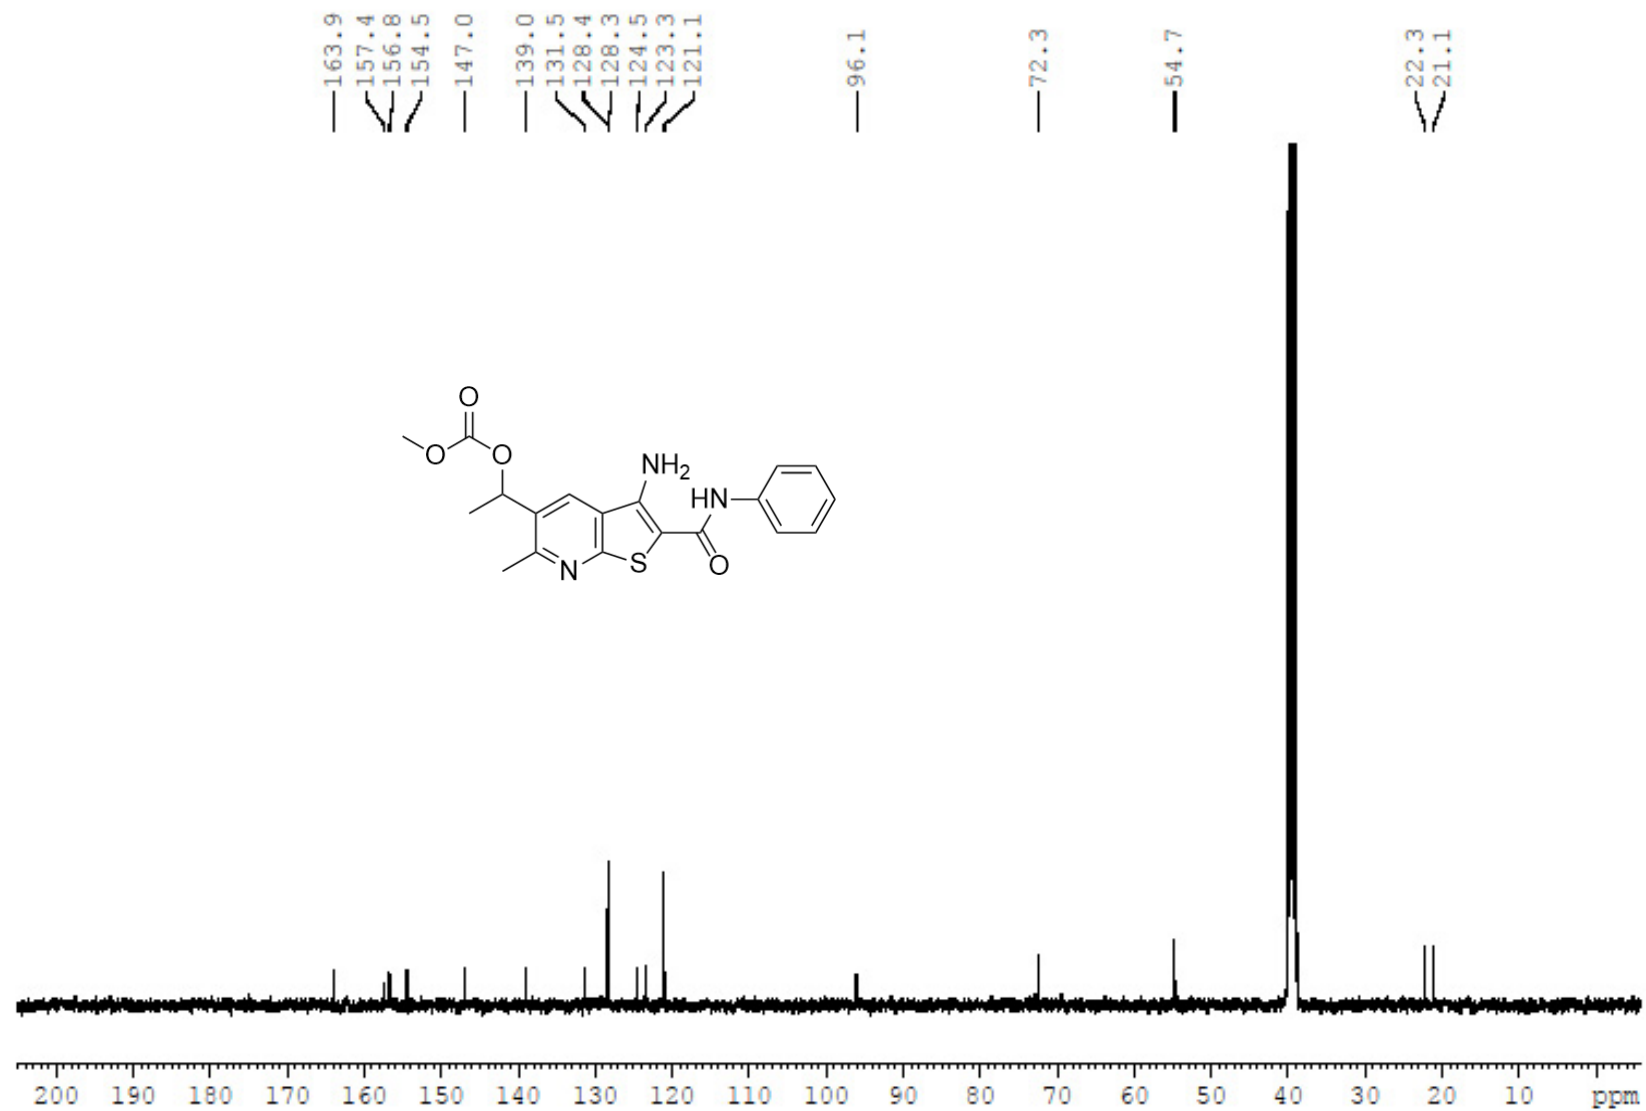

**Figure S22:** <sup>13</sup>C NMR spectrum of **8a** (100 MHz; DMSO-*d*<sub>6</sub>).

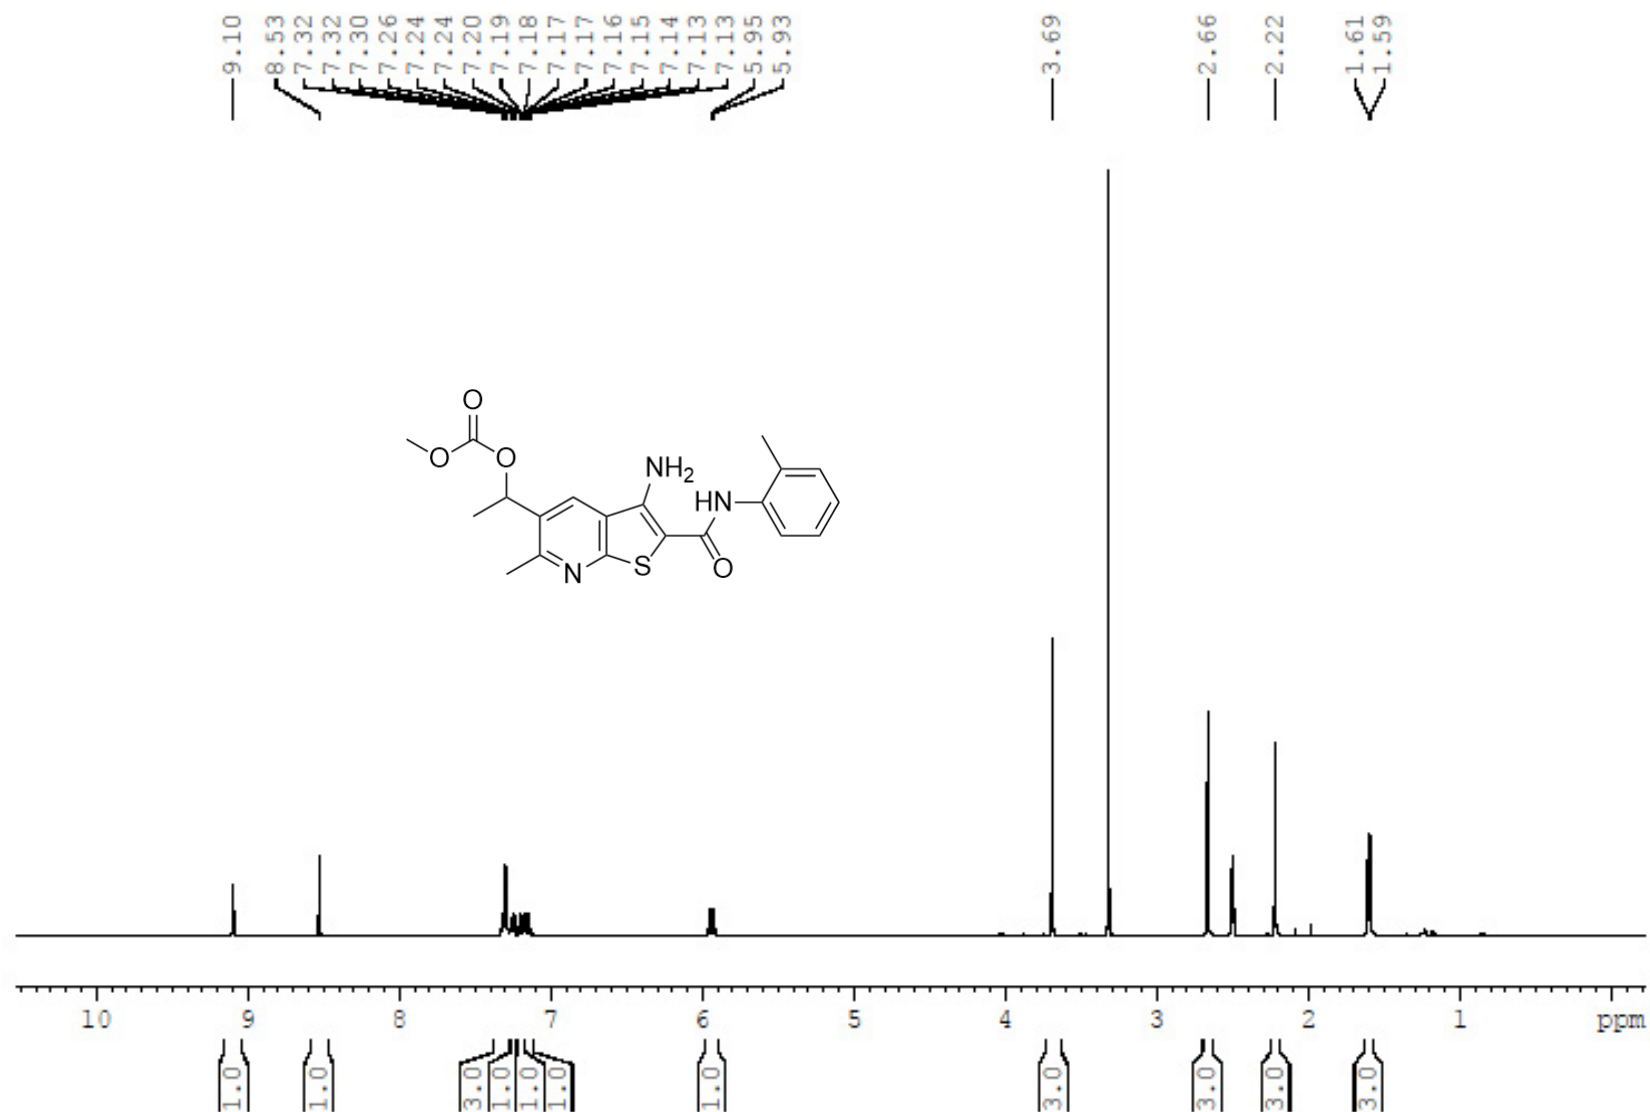

**Figure S23:** <sup>1</sup>H NMR spectrum of **8b** (400 MHz; DMSO-*d*<sub>6</sub>).

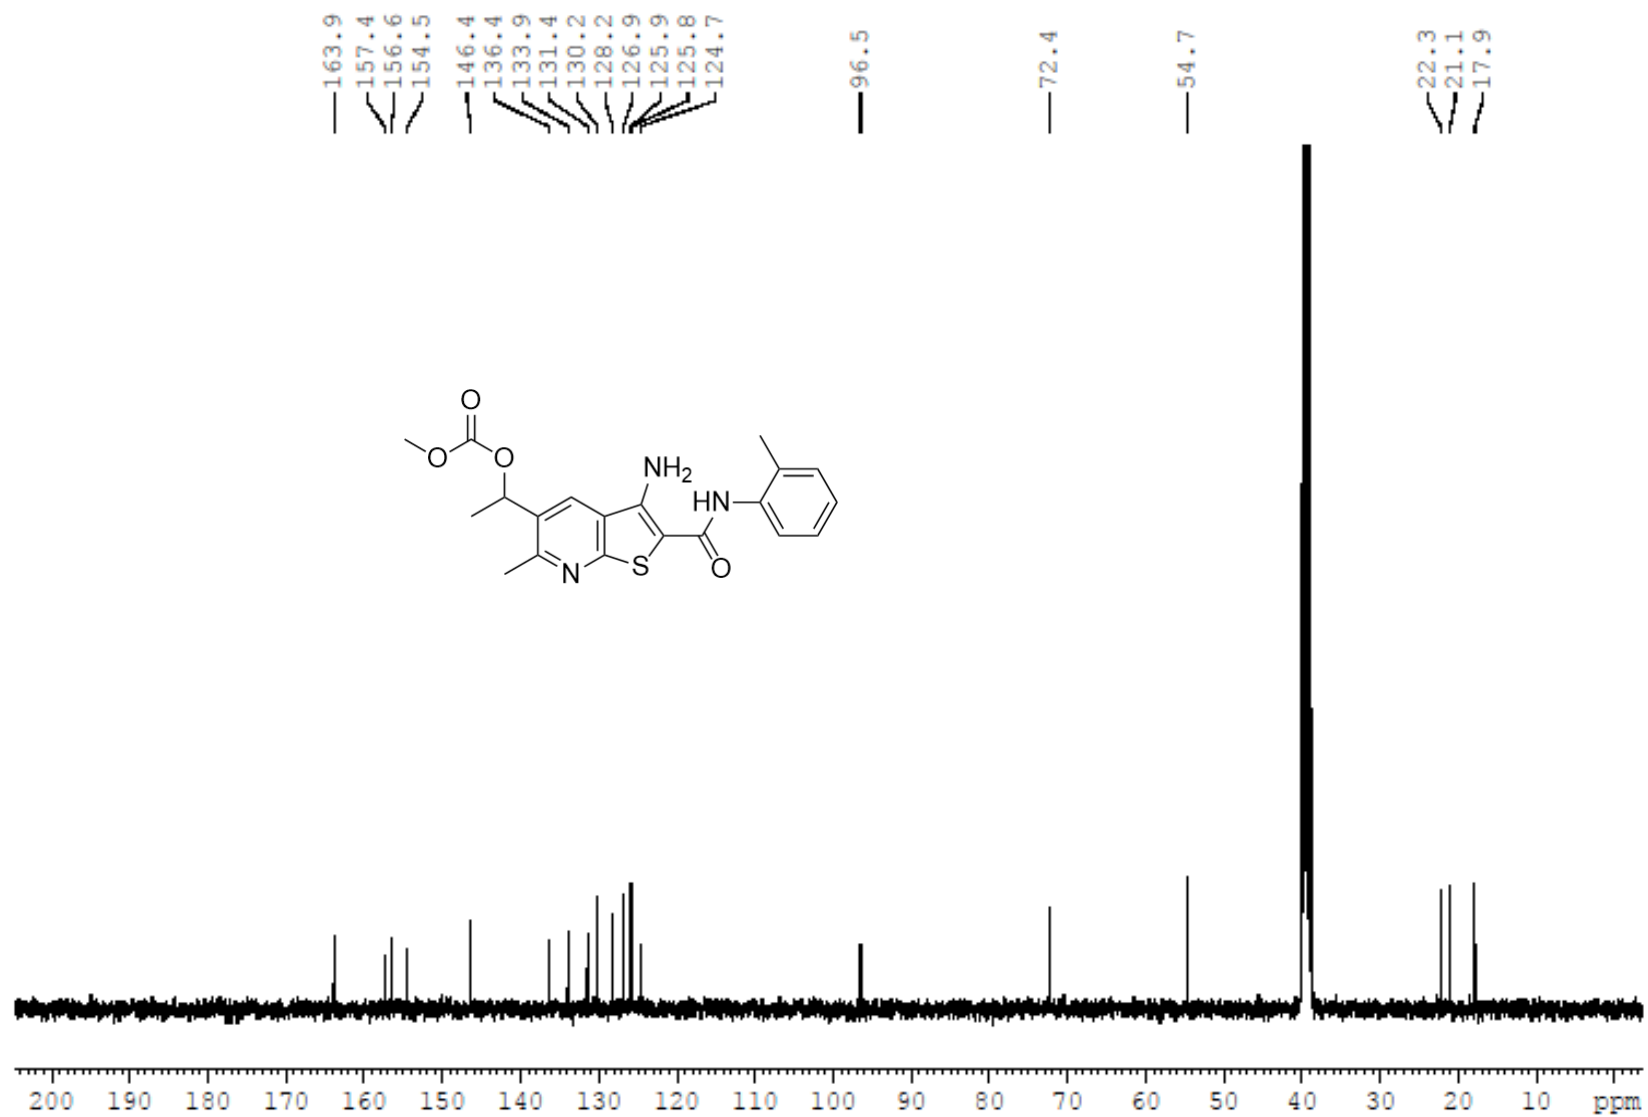

**Figure S24:** <sup>13</sup>C NMR spectrum of **8b** (100 MHz; DMSO-*d*<sub>6</sub>).

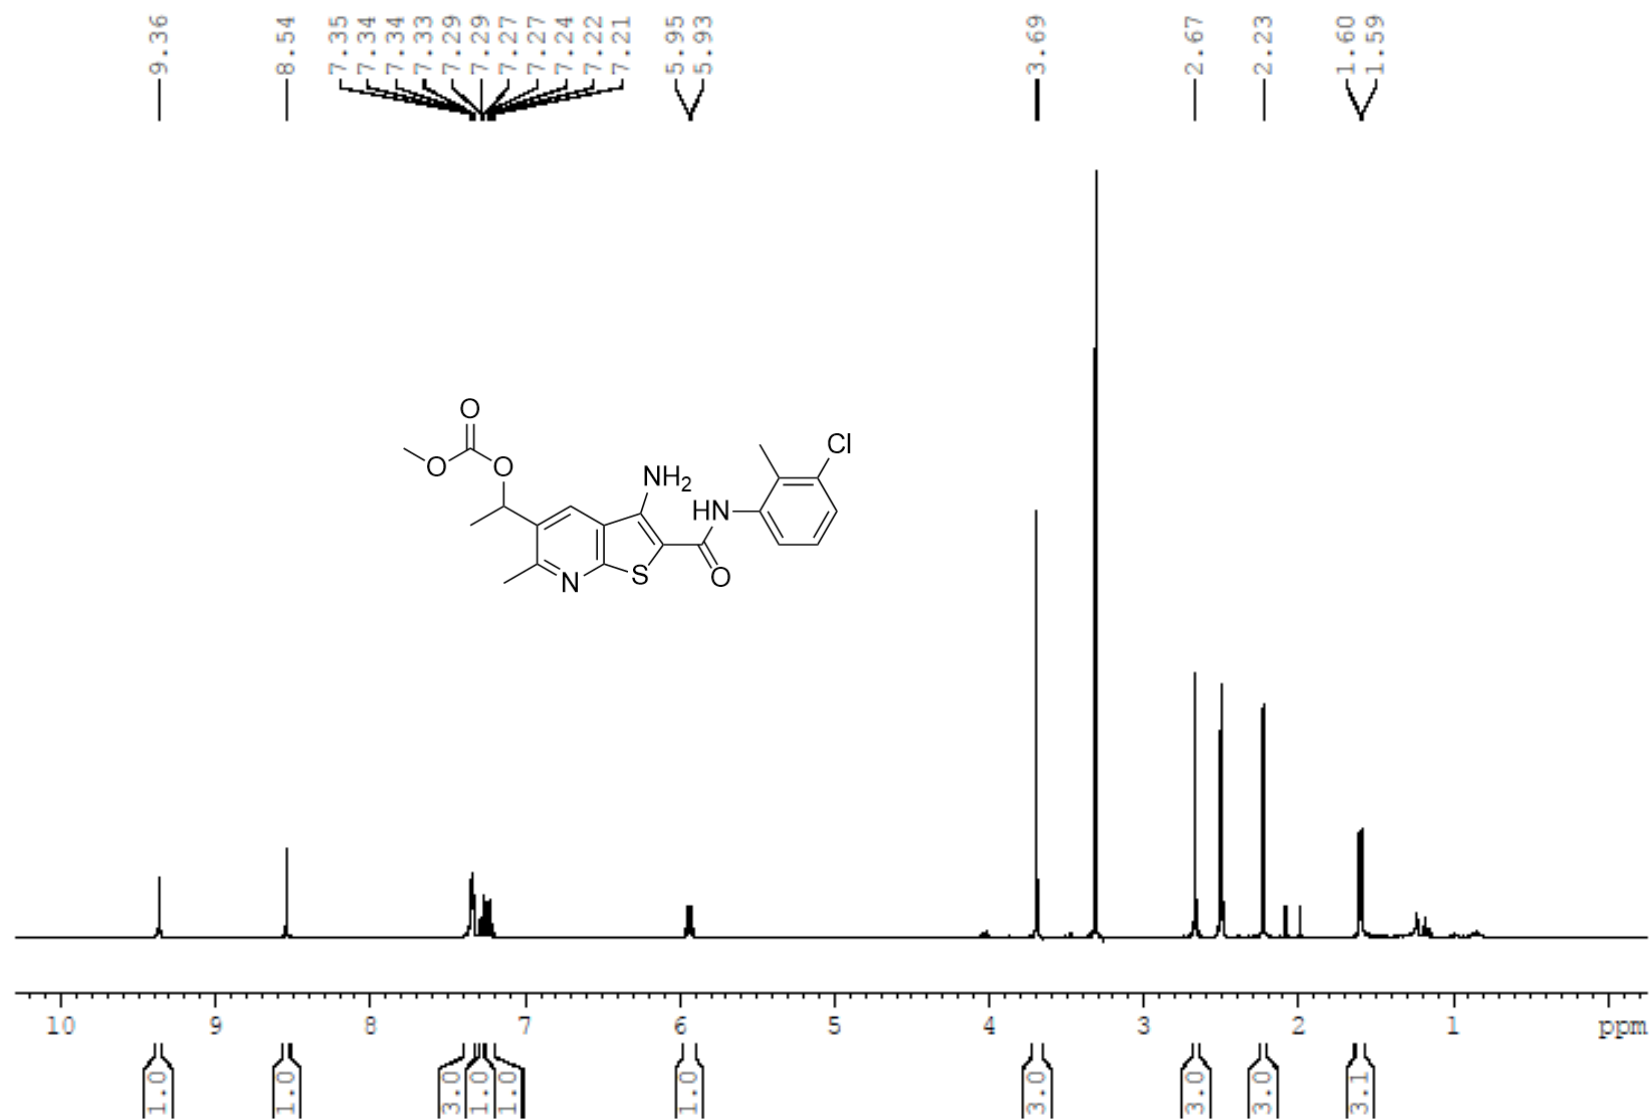

**Figure S25:**  $^1\text{H}$  NMR spectrum of **8c** (400 MHz;  $\text{DMSO-}d_6$ ).

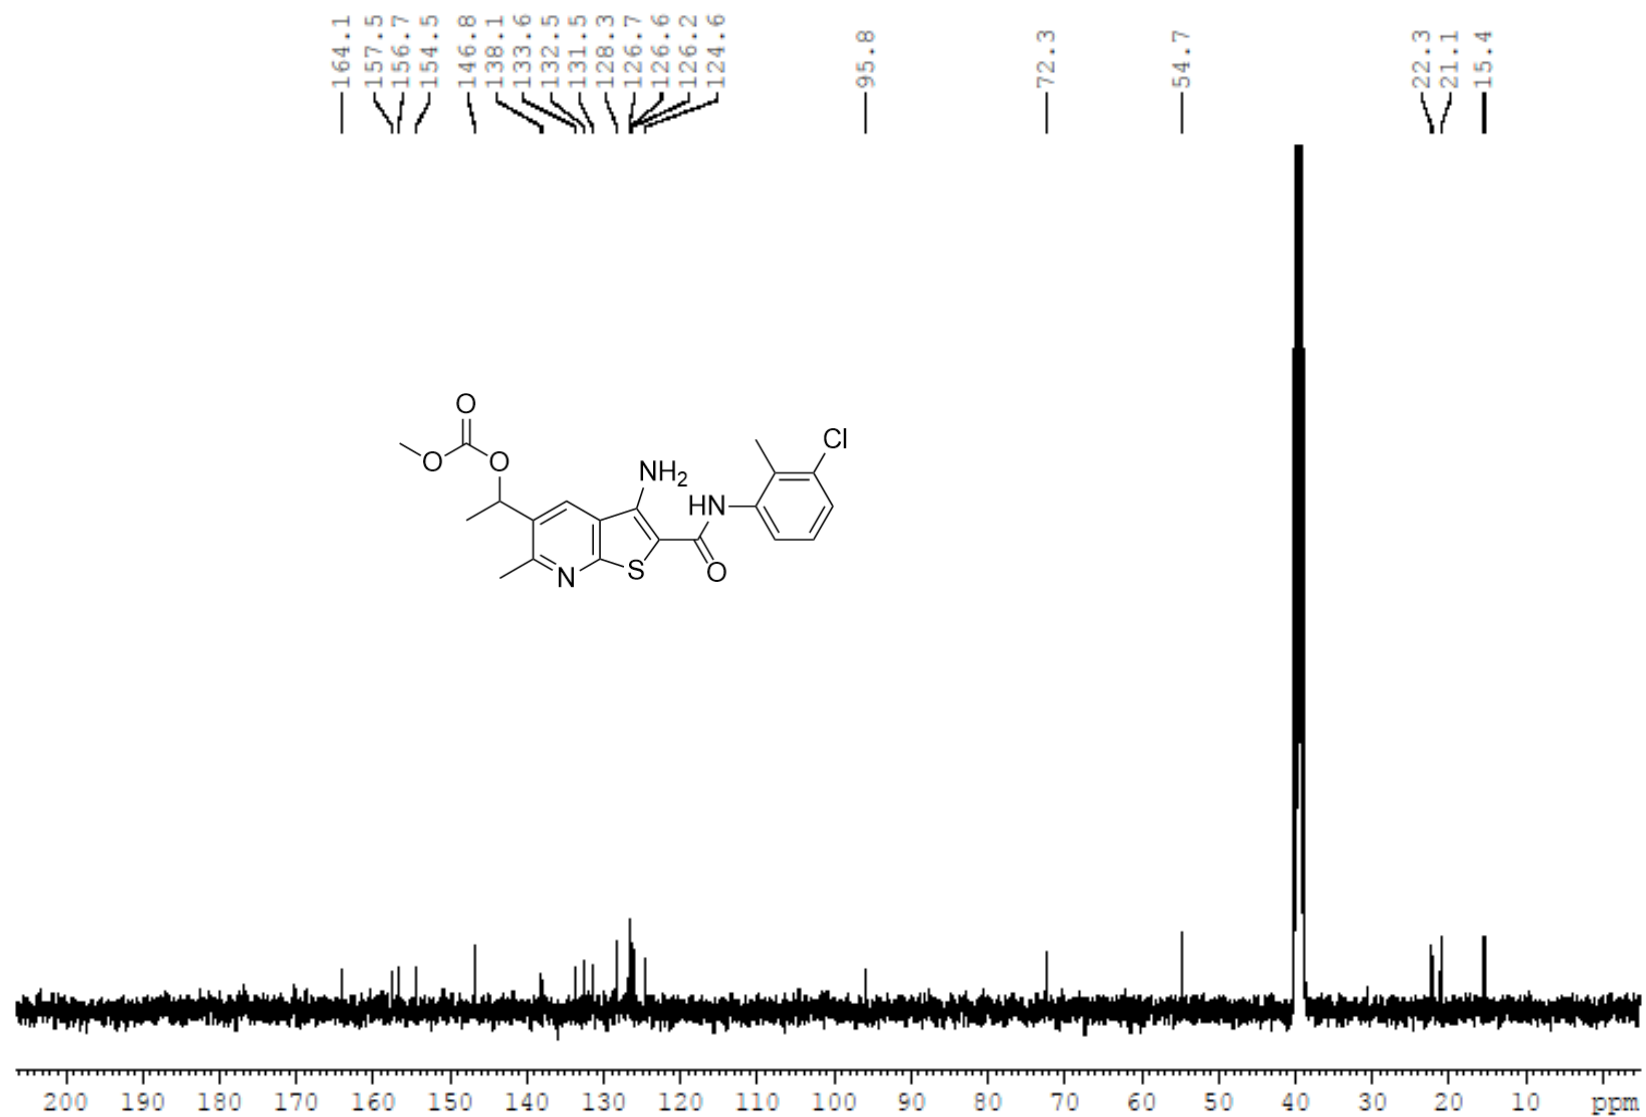

**Figure S26:** <sup>13</sup>C NMR spectrum of **8c** (100 MHz; DMSO-*d*<sub>6</sub>).

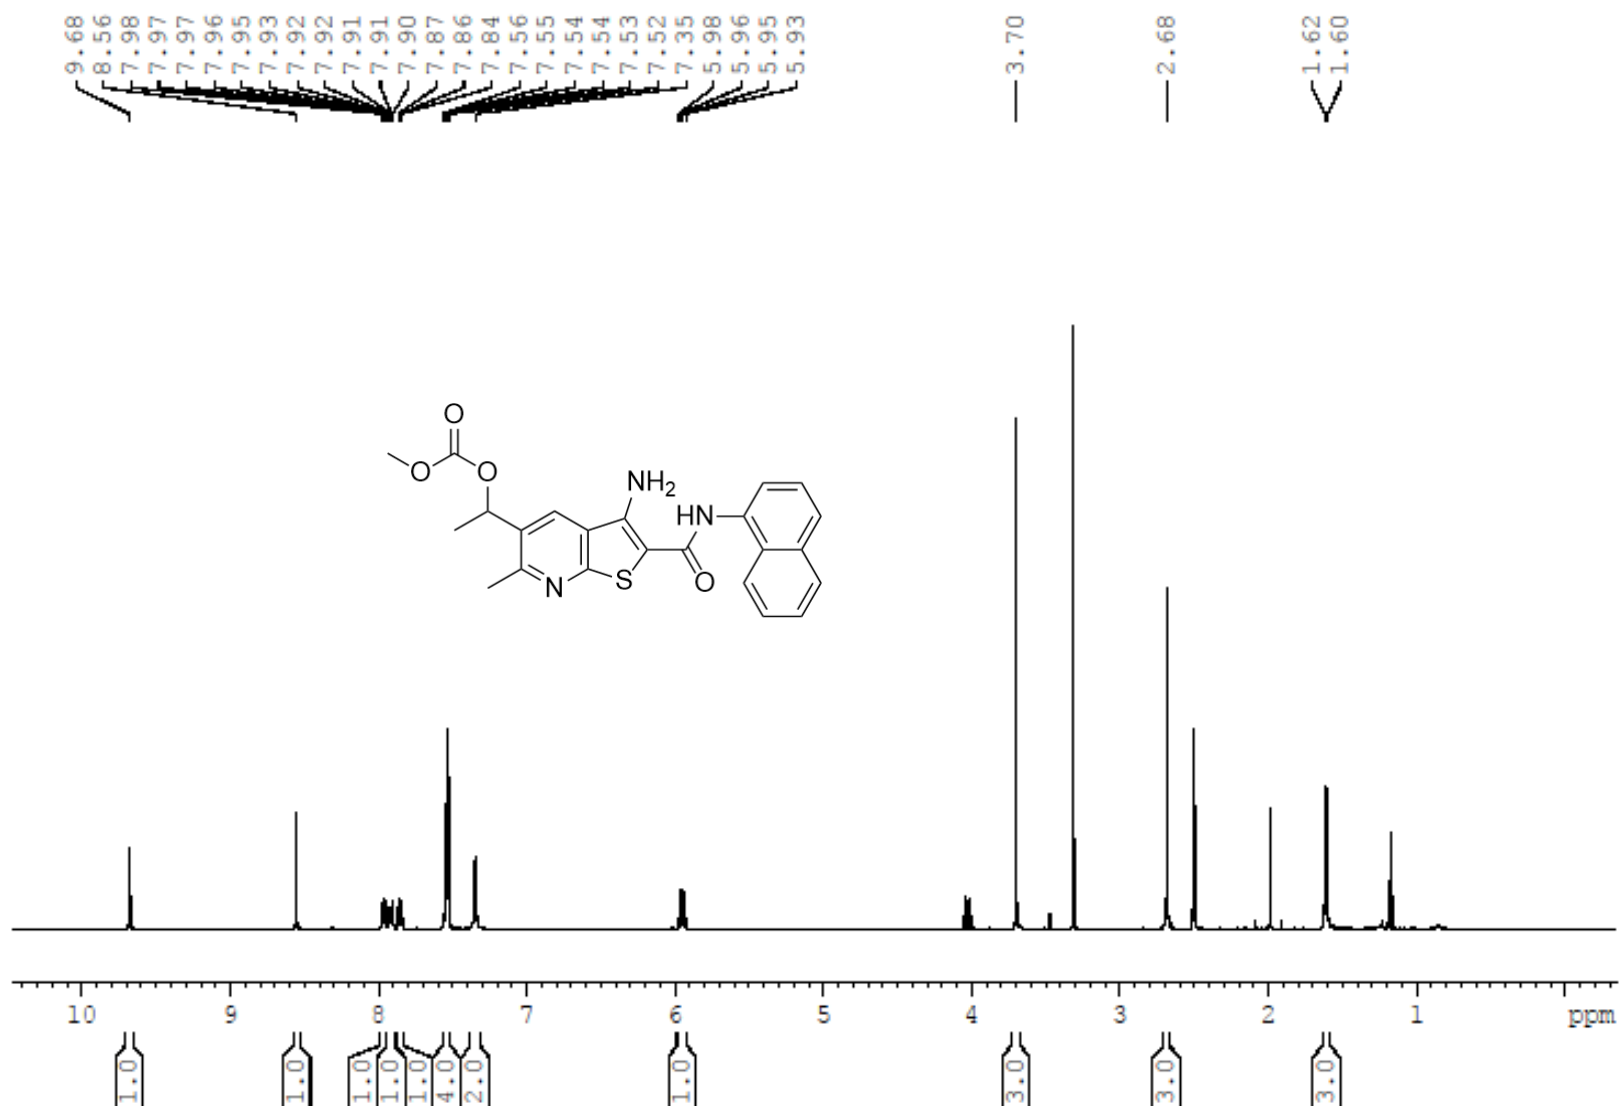

**Figure S27:** <sup>1</sup>H NMR spectrum of **8d** (400 MHz; DMSO-*d*<sub>6</sub>).

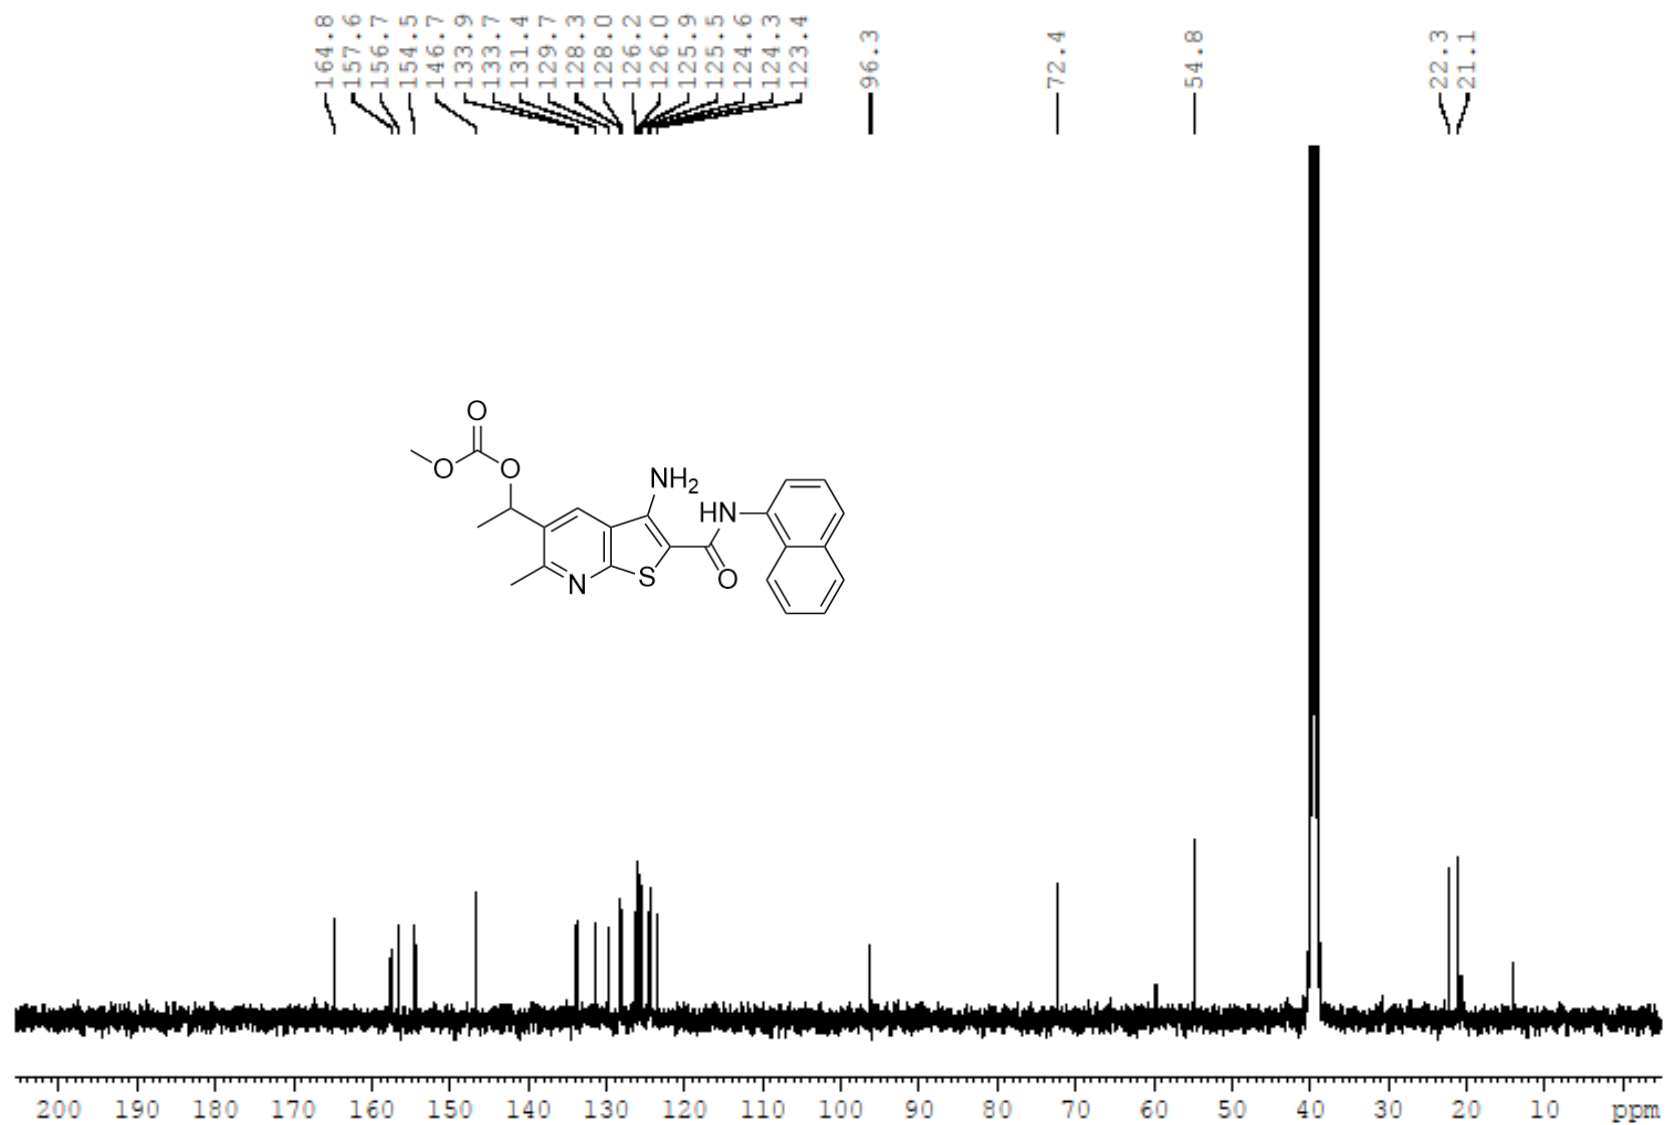

**Figure S28:** <sup>13</sup>C NMR spectrum of **8d** (100 MHz; DMSO-*d*<sub>6</sub>).

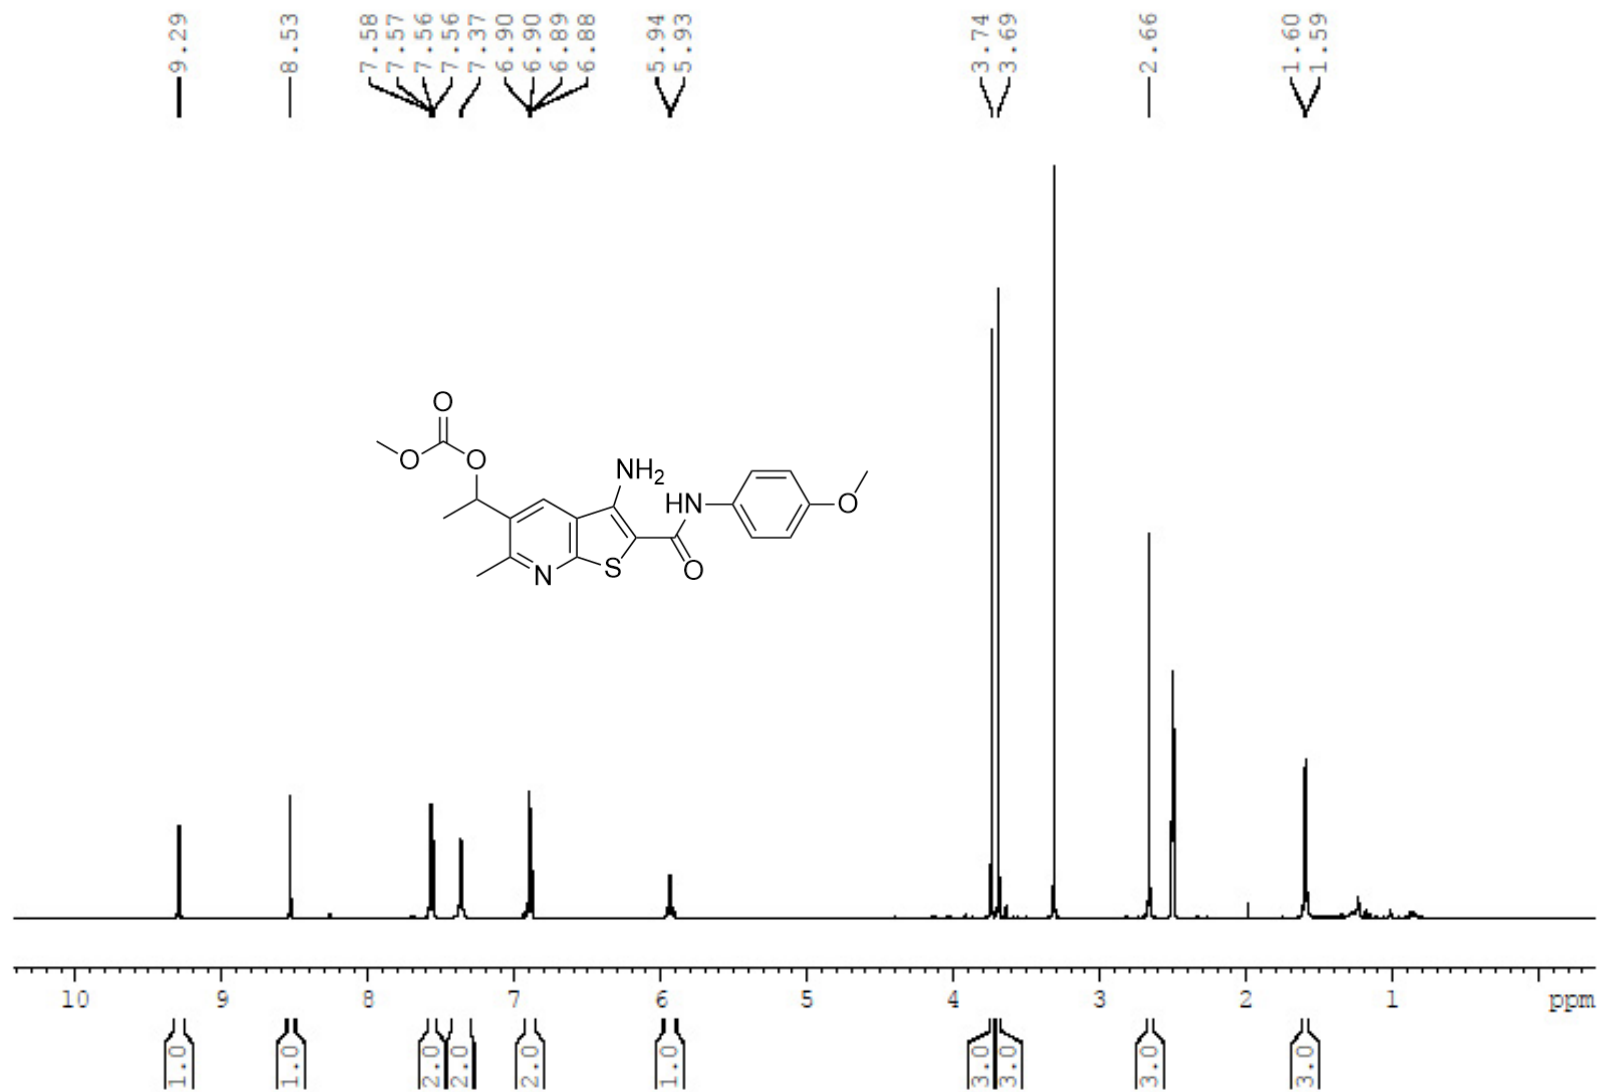

**Figure S29:**  $^1\text{H}$  NMR spectrum of **8e** (400 MHz;  $\text{DMSO-}d_6$ ).



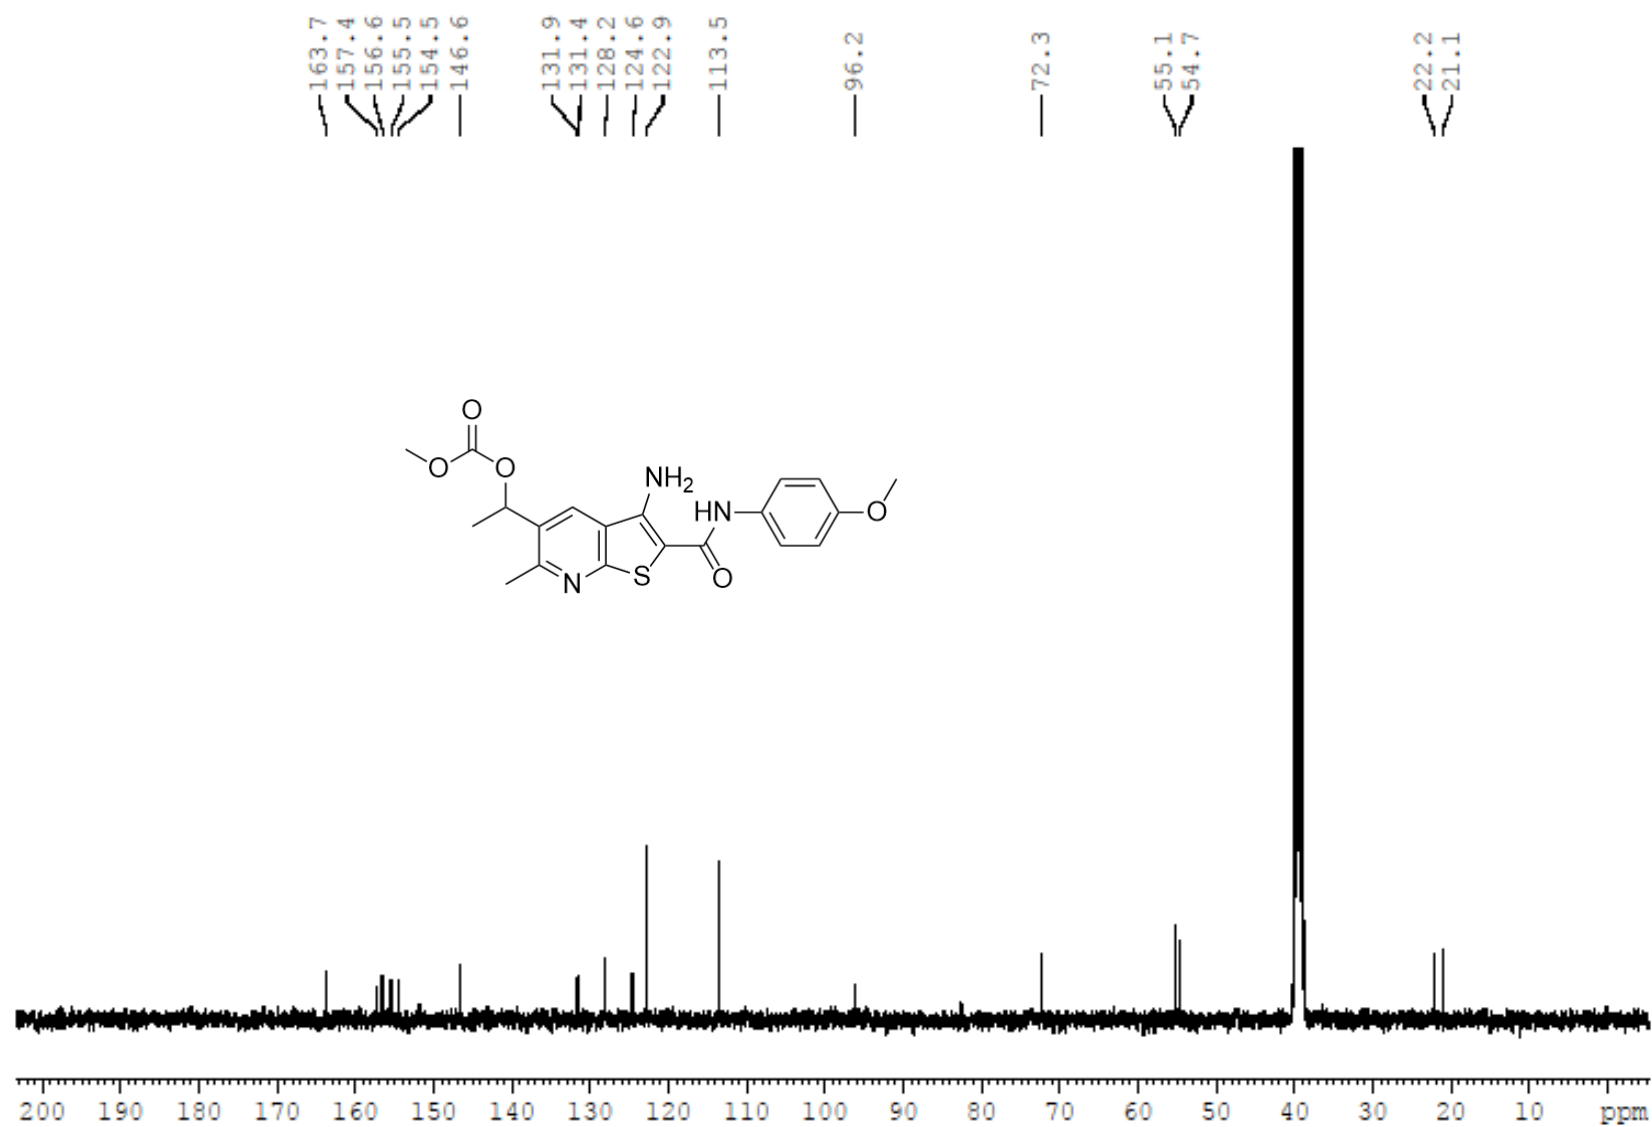

**Figure S30:** <sup>13</sup>C NMR spectrum of **8e** (100 MHz; DMSO-*d*<sub>6</sub>).

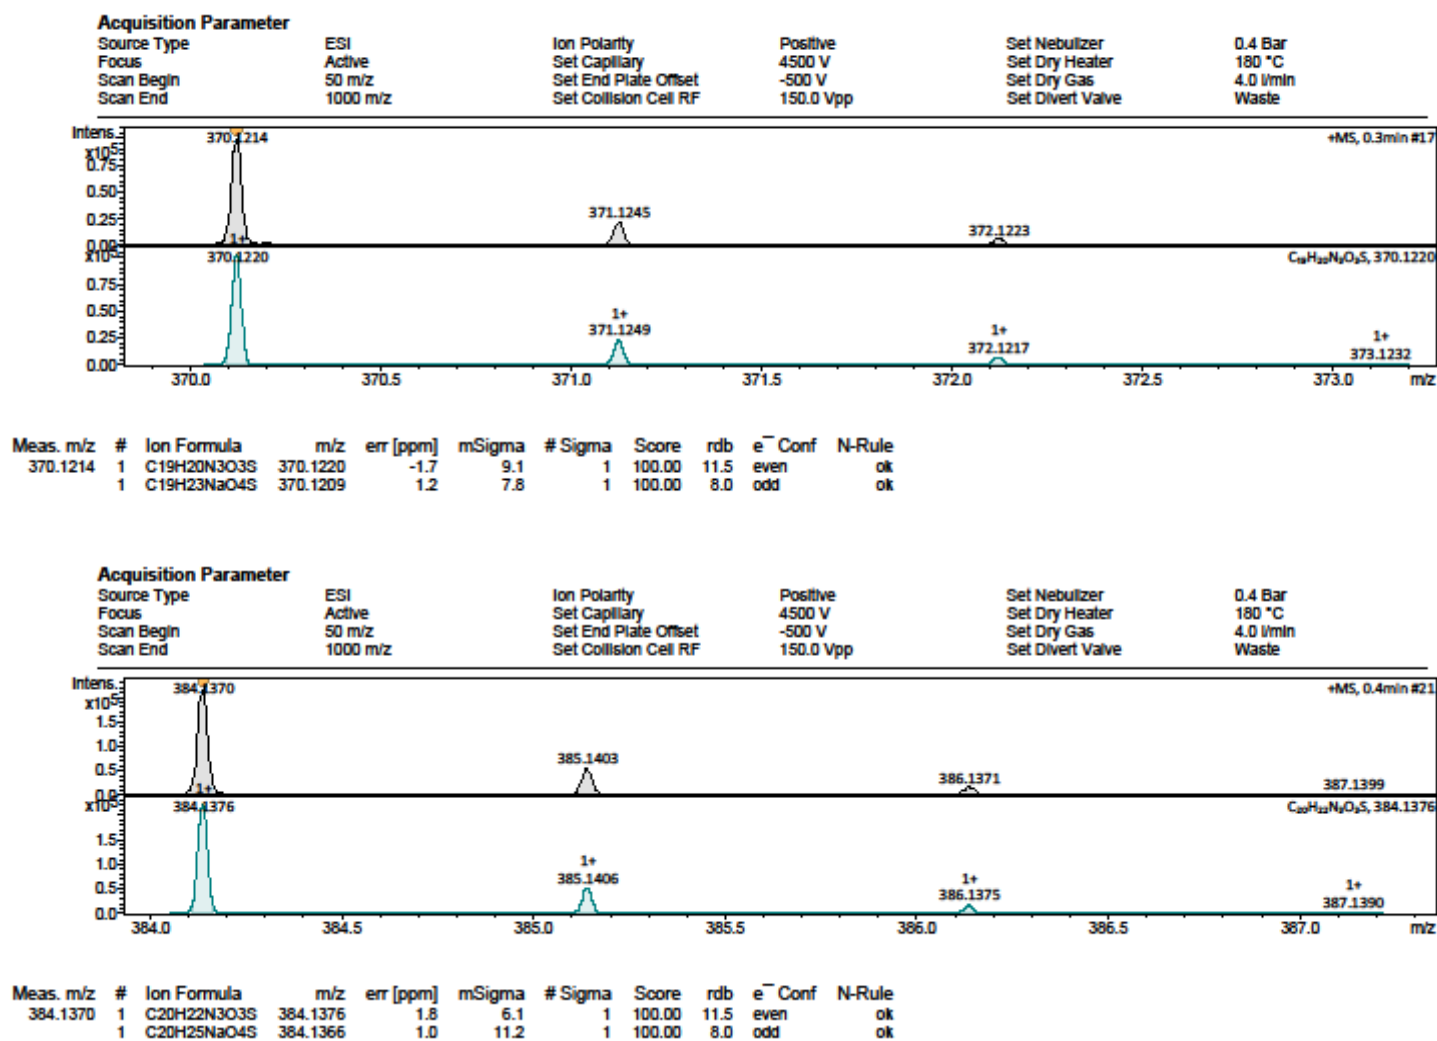

Figure S31: HRMS of **6a** (top) and **6b** (bottom).

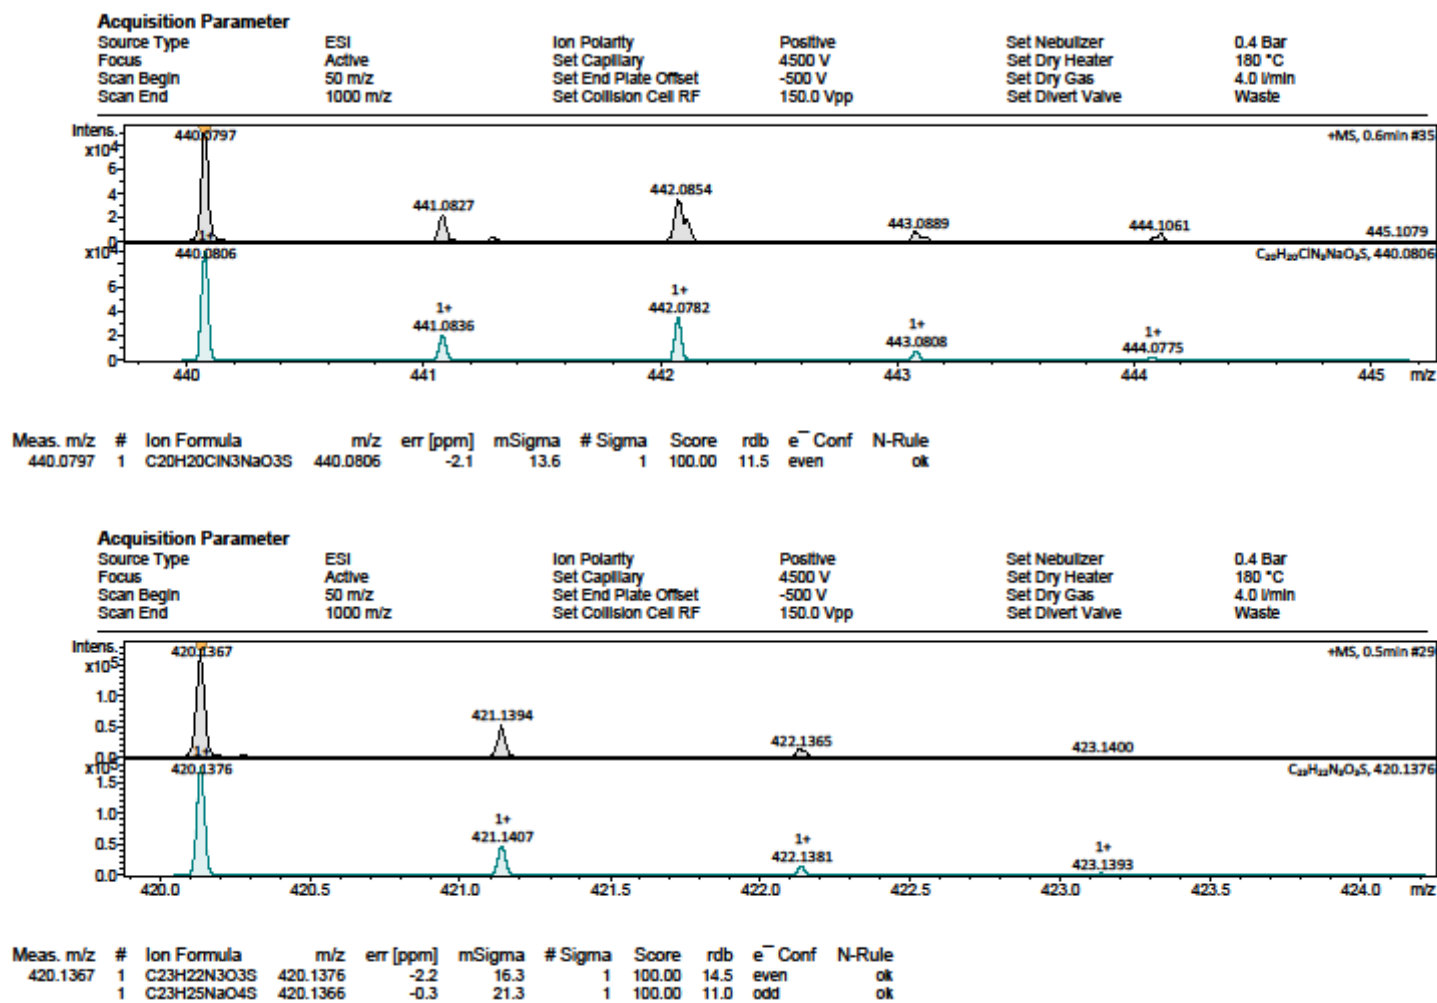

Figure S32: HRMS of **6c** (top) and **6d** (bottom).

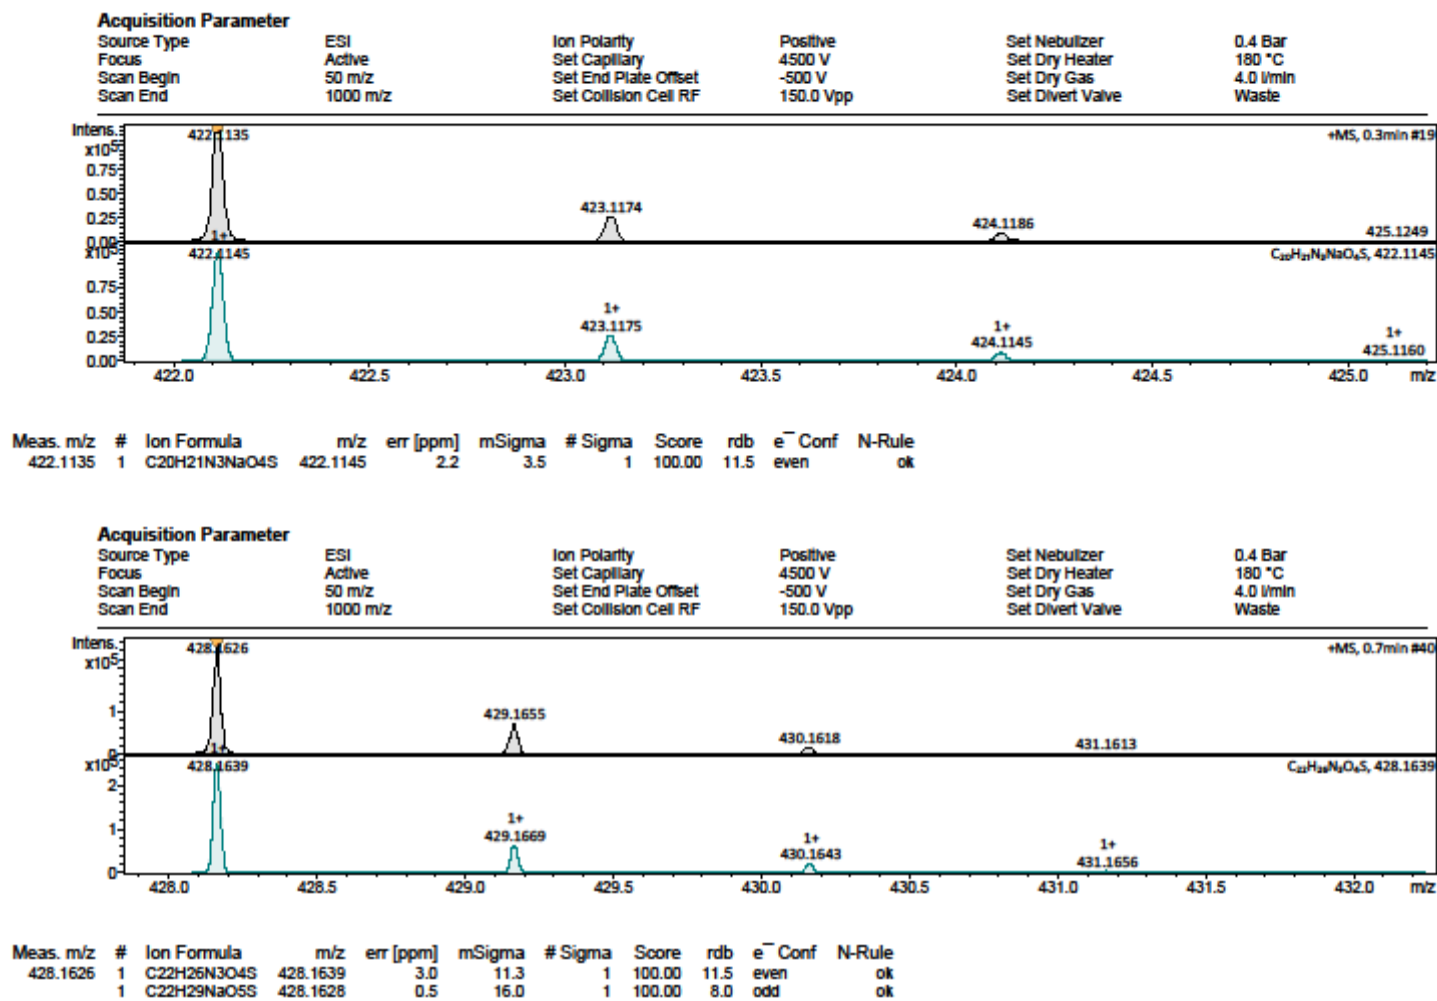

Figure S33: HRMS of **6e** (top) and **7a** (bottom).

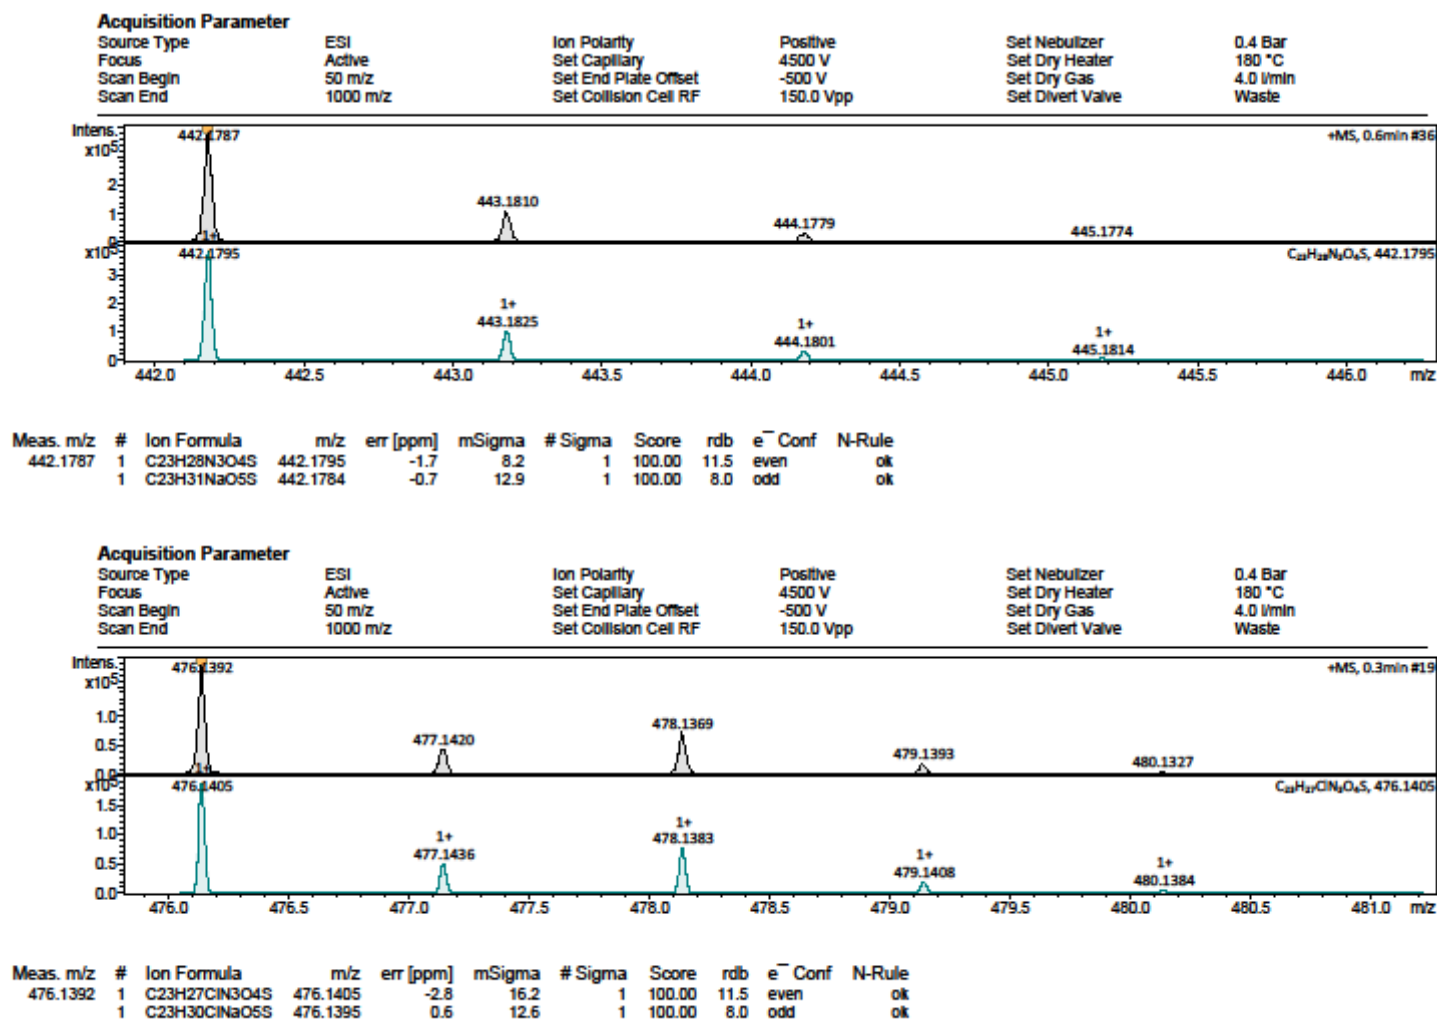

Figure S34: HRMS of 7b (top) and 7c (bottom).

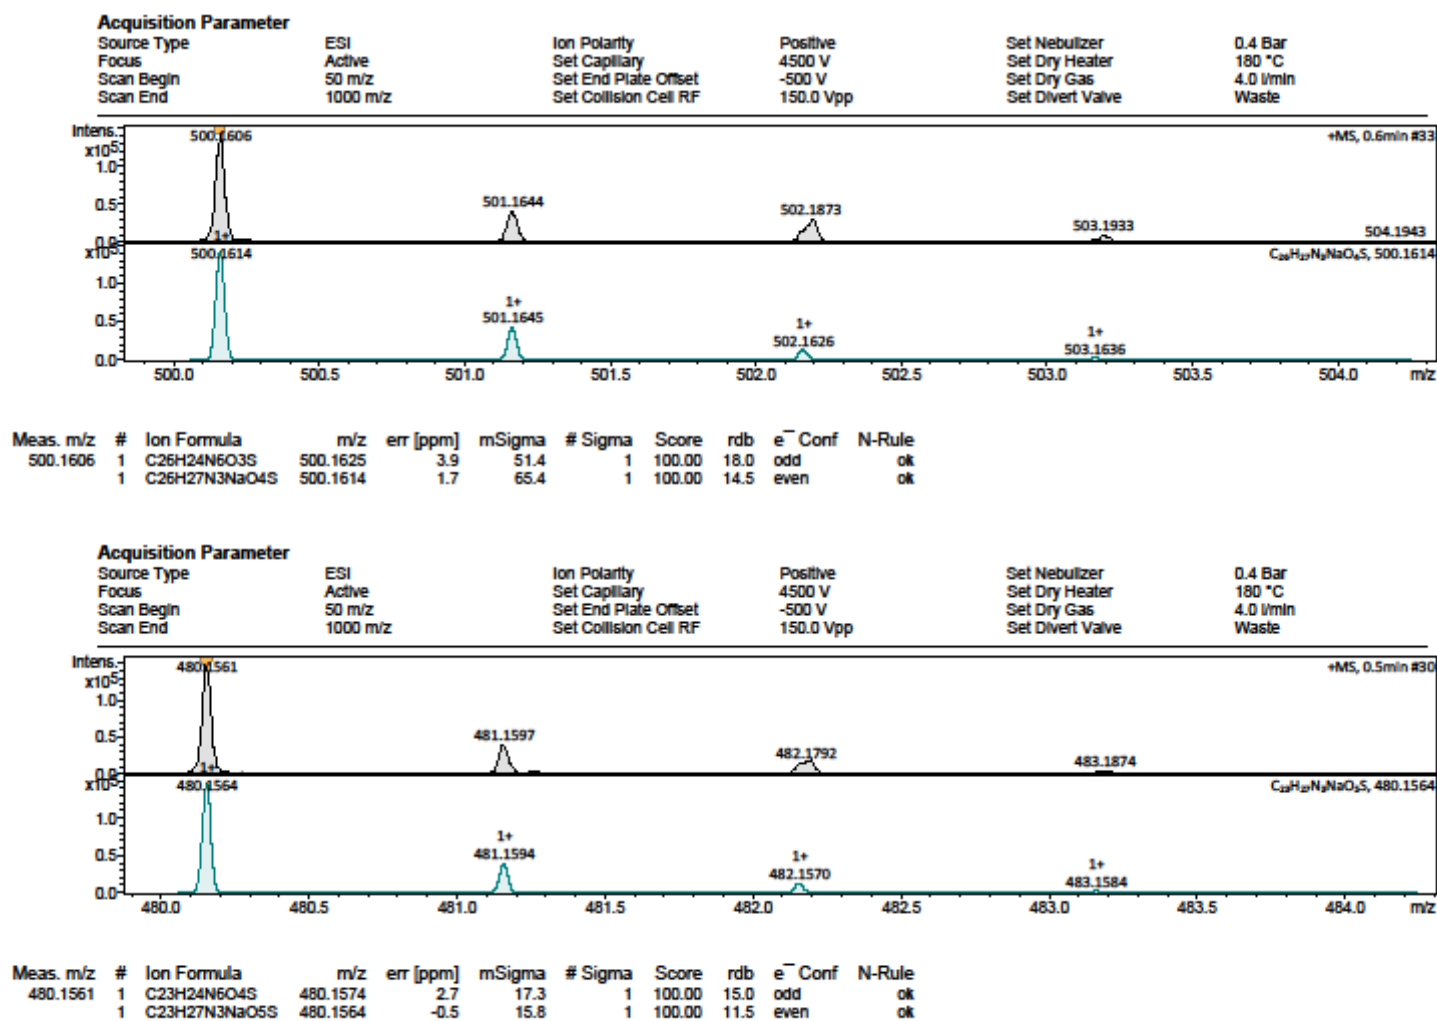

Figure S35: HRMS of 7d (top) and 7e (bottom).

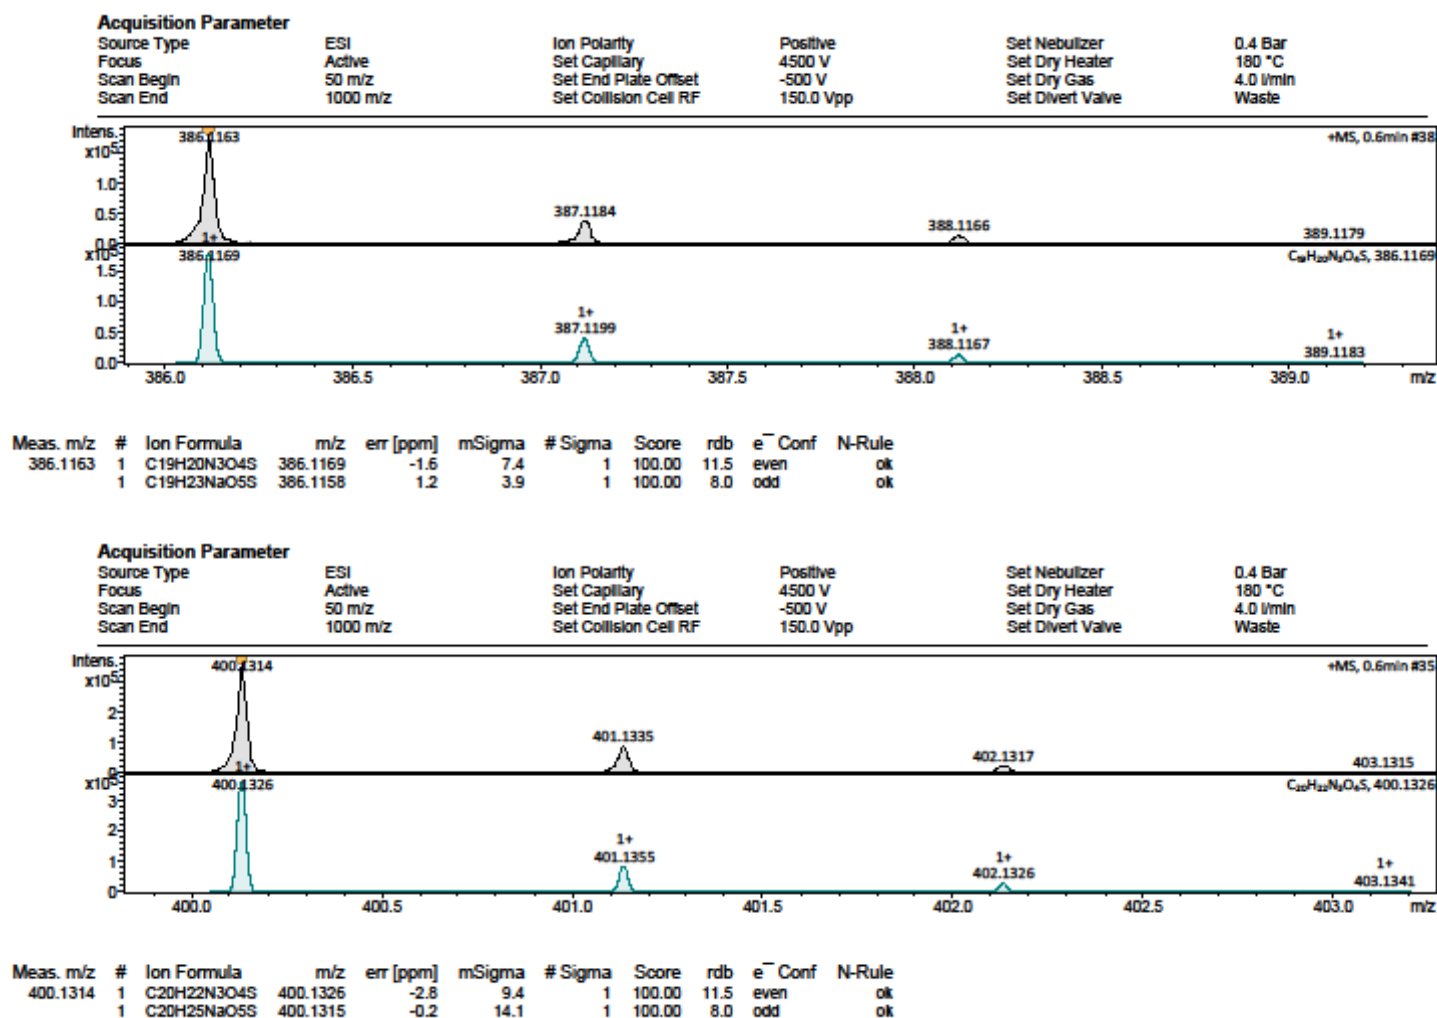

Figure S36: HRMS of **8a** (top) and **8b** (bottom).

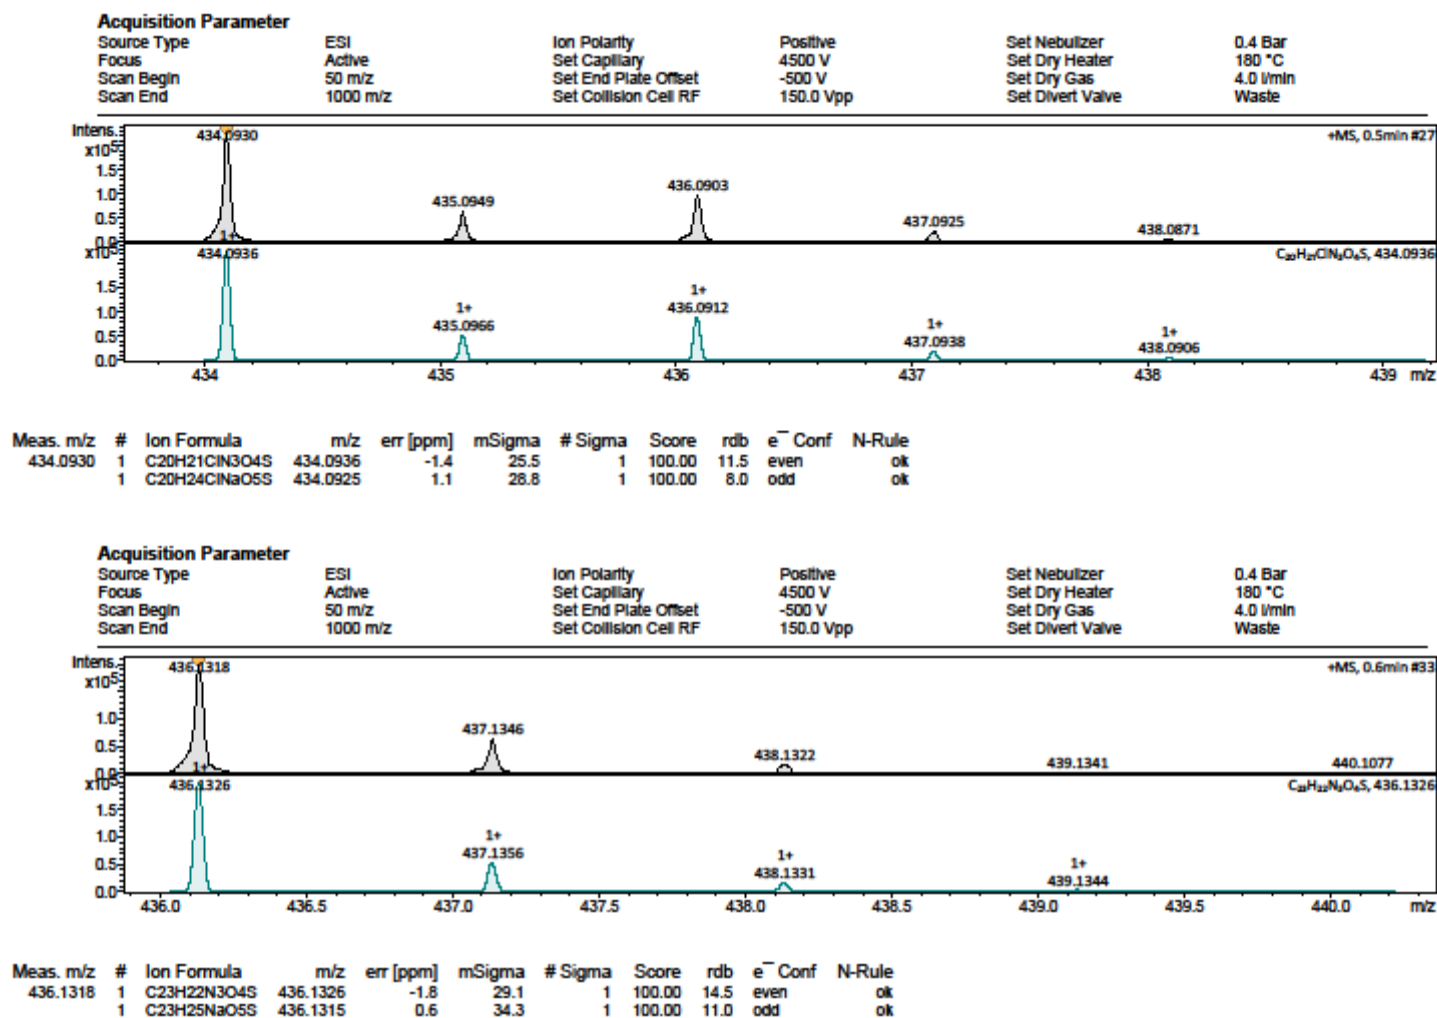

Figure S37: HRMS of **8c** (top) and **8d** (bottom).



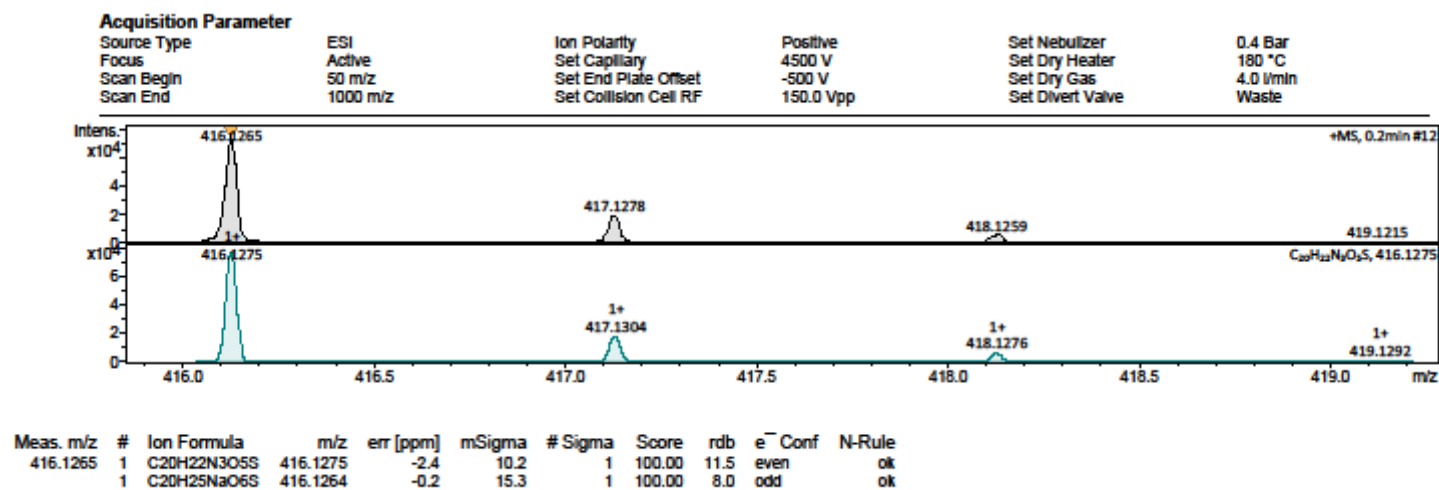

Figure S38: HRMS of **8e**.

**Table S1:** Computational logP and logS values for thieno[2,3-*b*]pyridines **5a-e**, **6a-e**, **7a-e**, and **8a-e** as calculated by ChemDraw Professional 19.1.1.21. \* denotes previously tested parent alcohol-containing thienopyridines.<sup>1</sup>

|            | LogP | LogS  |
|------------|------|-------|
| <b>5a*</b> | 2.93 | -4.02 |
| <b>5b*</b> | 3.41 | -4.22 |
| <b>5c*</b> | 3.97 | -4.92 |
| <b>5d*</b> | 3.92 | -5.92 |
| <b>5e*</b> | 2.80 | -4.07 |
| <b>6a</b>  | 3.16 | -4.79 |
| <b>6b</b>  | 3.64 | -4.99 |
| <b>6c</b>  | 4.20 | -5.68 |
| <b>6d</b>  | 4.15 | -6.19 |
| <b>6e</b>  | 3.03 | -4.84 |
| <b>7a</b>  | 4.62 | -6.05 |
| <b>7b</b>  | 5.10 | -6.25 |
| <b>7c</b>  | 5.66 | -6.95 |
| <b>7d</b>  | 5.61 | -7.46 |
| <b>7e</b>  | 4.49 | -6.10 |
| <b>8a</b>  | 3.74 | -5.00 |
| <b>8b</b>  | 4.23 | -5.20 |
| <b>8c</b>  | 4.79 | -5.90 |
| <b>8d</b>  | 4.74 | -6.41 |
| <b>8e</b>  | 3.62 | -5.05 |

**Table S2:** Melting points of compounds **5a-e**, **6a-e**, **7a-e**, and **8a-e**. \* denotes previously tested parent alcohol-containing thienopyridines.<sup>1</sup>

|            | Melting point (°C) |
|------------|--------------------|
| <b>5a*</b> | > 230              |
| <b>5b*</b> | 143-145            |
| <b>5c*</b> | > 230              |
| <b>5d*</b> | 216-218            |
| <b>5e*</b> | > 230              |
| <b>6a</b>  | 203-205            |
| <b>6b</b>  | 196-198            |
| <b>6c</b>  | 209-211            |
| <b>6d</b>  | 190-192            |
| <b>6e</b>  | > 230              |
| <b>7a</b>  | 190-192            |
| <b>7b</b>  | 187-189            |
| <b>7c</b>  | 199-201            |
| <b>7d</b>  | 202-204            |
| <b>7e</b>  | 196-198            |
| <b>8a</b>  | 194-196            |
| <b>8b</b>  | 213-215            |
| <b>8c</b>  | 202-204            |
| <b>8d</b>  | 188-190            |
| <b>8e</b>  | > 230              |

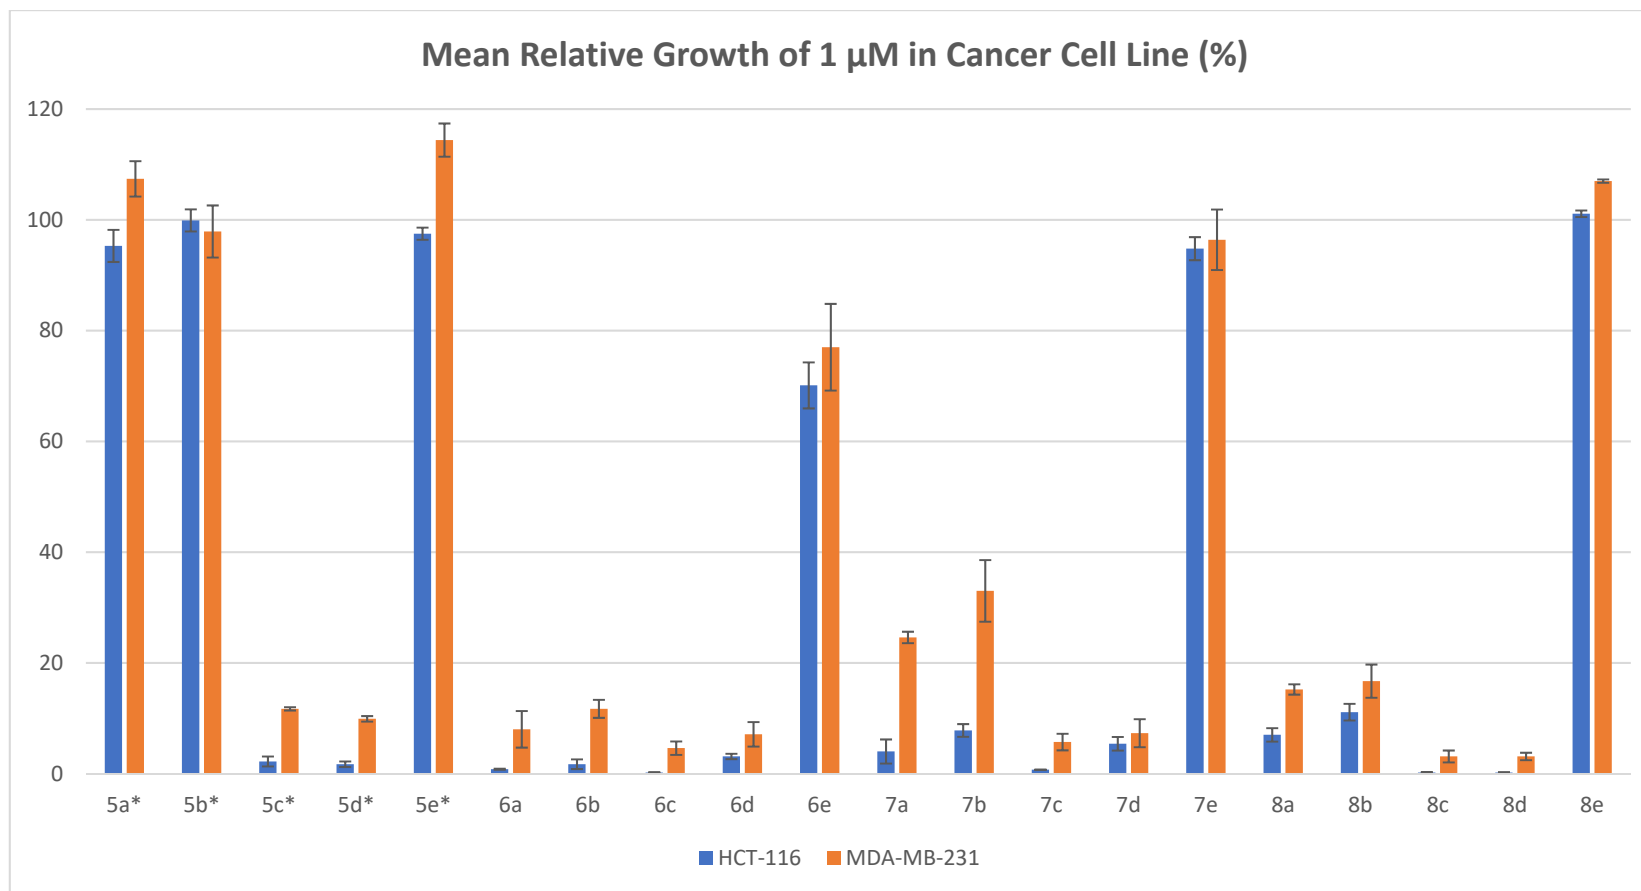

**Figure S39:** Antiproliferative results of compounds **5a-e**, **6a-e**, **7a-e**, and **8a-e**. \* denotes previously tested parent alcohol-containing thienopyridines.<sup>1</sup>
